1 **Epidemic doubling time of the COVID-19 epidemic by Chinese province**

2 Kamalich Muniz-Rodriguez, MPH<sup>1</sup>; Gerardo Chowell, PhD<sup>1</sup>; Chi-Hin Cheung, MS; Dongyu Jia, PhD;  
3 Po-Ying Lai, MS; Yiseul Lee, MPH, Manyun Liu, MS; Sylvia K. Ofori, MPH; Kimberlyn M. Roosa,  
4 MPH; Lone Simonsen, PhD; Cecile Viboud, PhD; Isaac Chun-Hai Fung, PhD

5 <sup>1</sup> These authors contribute equally as co-first authors

6 Author affiliations: Georgia Southern University (K. Muniz-Rodriguez, D. Jia, M. Liu, S. K. Ofori, I. C.-  
7 H. Fung); Georgia State University (G. Chowell, Y. Lee, K. M. Roosa); Independent researcher (C.-H.  
8 Cheung); Boston University (P.-Y. Lai), Roskilde University (L. Simonsen), The National Institutes of  
9 Health (G. Chowell, C. Viboud)

10 Email addresses: [kml1200@georgiasouthern.edu](mailto:kml1200@georgiasouthern.edu) (K. Muniz-Rodriguez); [gchowell@gsu.edu](mailto:gchowell@gsu.edu) (G.  
11 Chowell) [westerpants@gmail.com](mailto:westerpants@gmail.com) (C.-H. Cheung); [djia@georgiasouthern.edu](mailto:djia@georgiasouthern.edu) (D. Jia); [pylai@bu.edu](mailto:pylai@bu.edu)  
12 (P.-Y. Lai); [ylee97@student.gsu.edu](mailto:ylee97@student.gsu.edu) (Y. Lee); [ml16842@georgiasouthern.edu](mailto:ml16842@georgiasouthern.edu) (M. Liu);  
13 [so01935@georgiasouthern.edu](mailto:so01935@georgiasouthern.edu) (S. K. Ofori); [kroosa1@student.gsu.edu](mailto:kroosa1@student.gsu.edu) (K. M. Roosa);  
14 [lsimonsen2@gmail.com](mailto:lsimonsen2@gmail.com) (L. Simonsen); [viboudc@mail.nih.gov](mailto:viboudc@mail.nih.gov) (C. Viboud); [cfung@georgiasouthern.edu](mailto:cfung@georgiasouthern.edu)  
15 (I. C.-H. Fung)

16 Please address correspondence to Isaac Chun-Hai Fung, PhD, Department of Biostatistics, Epidemiology  
17 and Environmental Health Sciences, Jiann-Ping Hsu College of Public Health, Georgia Southern  
18 University, Statesboro, GA 30460, USA. +1 912 478 5079. Email: [cfung@georgiasouthern.edu](mailto:cfung@georgiasouthern.edu)

19 Genre: Research Letter (Max. 800 words)

20 Current word count: 911.

21

22 **Abstract: n=50; Word limit = 50**

23 COVID-19 epidemic doubling time by Chinese province was increasing from January 20 through  
24 February 9, 2020. Yet, the harmonic mean doubling time was relatively short, ranging from 1.4 (Hunan,  
25 95% CI, 1.2-2.0) to 3.0 (Xinjiang, 95% CI, 2.0-4.9) days, with an estimate of 2.5 days (95% CI, 2.4-2.7)  
26 for Hubei.

27 **To the editor:**

28 Our ability to estimate the basic reproduction number of emerging infectious diseases is often  
29 hindered by the paucity of information about the epidemiological characteristics and transmission  
30 mechanisms of new pathogens (1). Alternative metrics could synthesize real-time information about the  
31 extent to which the epidemic is expanding over time. Such metrics would be particularly useful if they  
32 rely on minimal and routinely collected data that capture the trajectory of an outbreak (2).

33 Epidemic doubling times characterize the sequence of intervals at which the cumulative incidence  
34 doubles (3). Here we analyze the number of times the cumulative incidence doubles and the evolution of  
35 the doubling times of the COVID-19 epidemic in mainland China (4). We use province-level data from  
36 January 20 (when nationwide reporting began) through February 9, 2020. See Technical Appendix 1 for a  
37 sensitivity analysis based on a longer time period. If an epidemic is growing exponentially with a constant  
38 growth rate  $r$ , the doubling time remains constant and equals to  $(\ln 2)/r$ . An increase in the epidemic  
39 doubling time indicates a slowdown in transmission if the underlying reporting rate remains unchanged  
40 (Technical Appendix 2).

41 Daily cumulative incidence data were retrieved from provincial health commissions' websites  
42 (Technical Appendix 3). Data were double-checked against the cumulative national total published by the  
43 National Health Commission (5), data compiled by the Centre for Health Protection, Hong Kong, when  
44 available (6) and by John Hopkins University (7). Whenever discrepancies arose, provincial government  
45 sources were deemed authoritative. Tibet was excluded from further analysis because there had only been  
46 one case reported during the study period. See Technical Appendix 1 for data.

47 From January 20 through February 9, the harmonic mean doubling time estimated from  
48 cumulative incidence ranged from 1.4 (95% CI, 1.2, 2.0) days (Hunan) to 3.0 (95% CI, 2.0, 4.9) days  
49 (Xinjiang). In Hubei, it was estimated as 2.5 (95% CI, 2.4, 2.7) days. For illustrative purpose only, this  
50 estimate corresponds to an estimated effective reproductive number in a range of 2.1 to 4.2 in scenarios

51 based on different assumptions and data sources. See Technical Appendix 2 for scenario analysis of  
52 various parameter values. The cumulative incidence doubled 6 times in Hubei. The harmonic mean  
53 doubling time in mainland China except Hubei was 1.8 (95% CI, 1.5-2.2) days. Provinces with a  
54 harmonic mean doubling time <2d included Fujian, Guangxi, Hebei, Heilongjiang, Henan, Hubei, Hunan,  
55 Jiangxi, Shandong, Sichuan, and Zhejiang (Figures 1 and S1).

56 As the epidemic progressed, it took longer for the cumulative incidence in mainland China  
57 (except Hubei) to double itself, which indicated an overall sub-exponential growth pattern outside Hubei  
58 (Figure S1A). In Hubei, the doubling time decreased and then increased. A gradual increase in the  
59 doubling time coincide with the social distancing measures and intra-and-inter-provincial travel  
60 restrictions imposed across China since the implementation of quarantine of Wuhan on January 23 (8).

61 Our estimates of doubling times are shorter than recent estimates of 7.4 days (95% CI, 4.2-14)  
62 (4), 6.4 days (95% CrI, 5.8-7.1) (9), and 7.1 days (95% CI, 3.0-20.5) (10) respectively. Li et al. covered  
63 cases reported by January 22 (4). Wu et al. statistically inferred case counts in Wuhan by internationally  
64 exported cases as of January 25 (9). Volz et al. identified a common viral ancestor on December 8, 2019  
65 using Bayesian phylogenetic analysis and fitted an exponential growth model to provide the epidemic  
66 growth rate (10). Our estimates are based on cumulative reported numbers of confirmed cases by date of  
67 reports by province from January 20 through February 9. Our study is also congruent with Maier and  
68 Brockmann (11) who also identified sub-exponential growth of the outbreak across provinces, as mass  
69 quarantine and restriction of travels across mainland China began since January 23, 2020.

70 Our study is subject to limitations, including the underreporting of confirmed cases as reported by  
71 Chinese media (12). One reason for underreporting is underdiagnosis, due to lack of diagnostic tests,  
72 healthcare workers, and other resources. Further, underreporting is likely heterogeneous across provinces.  
73 As long as reporting remains invariant over time within the same province, the calculation of doubling  
74 times remains reliable; however, this is a strong assumption. Growing awareness of the epidemic and  
75 increasing availability of diagnostic tests might have strengthened reporting over time, which could have

76 artificially shortened the doubling time. Nevertheless, apart from Hubei and Guangdong (first case  
77 reported on January 19), nationwide reporting only began on January 20, and at this point, Chinese  
78 authorities had openly acknowledged the magnitude and severity of the epidemic. Due to a lack of  
79 detailed case data describing incidence trends for imported and local cases, we focused our analysis on  
80 the overall trajectory of the epidemic without adjusting for the role of imported cases on the local  
81 transmission dynamics. Indeed, it is likely that the proportion of imported cases was significant for  
82 provinces that only reported a few cases; their short doubling times in the study period could simply  
83 reflect rapid detection of imported cases. However, with the data until February 9, only two provinces had  
84 a cumulative case count of <40 (Table S1). It would be interesting to investigate the evolution of the  
85 doubling time after accounting for case importations if more detailed data becomes available.

86 To conclude, we observed an increasing trend in the epidemic doubling time of COVID-19 by  
87 Chinese province from January 20 through February 9, 2020. The harmonic mean doubling time of  
88 cumulative incidence in Hubei during the study period was short and estimated at 2.5 (95% CI, 2.4-2.7)  
89 days.

#### 90 **First author(s) biography**

91 Kamalich Muniz-Rodriguez, MPH, is a doctoral student at the Jiann-Ping Hsu College of Public Health,  
92 Georgia Southern University. Her research interests include infectious disease epidemiology, digital  
93 epidemiology and disaster epidemiology.

94 Gerardo Chowell, PhD, is Professor of Epidemiology and Biostatistics, and Chair of the Department of  
95 Population Health Sciences at Georgia State University School of Public Health. As a mathematical  
96 epidemiologist, Prof Chowell studies the transmission dynamics of emerging infectious diseases, such as  
97 Ebola, MERS and SARS.

#### 98 **Acknowledgement**

99 GC acknowledges support from NSF grant 1414374 as part of the joint NSF-NIH-USDA Ecology and  
100 Evolution of Infectious Diseases program. ICHF acknowledges salary support from the National Center  
101 for Emerging and Zoonotic Infectious Diseases, Centers for Disease Control and Prevention  
102 (19IPA1908208). This article is not part of ICHF's CDC-sponsored projects.

103 **Disclaimer**

104 This article does not represent the official positions of the Centers for Disease Control and Prevention, the  
105 National Institutes of Health, or the United States Government.

106 **References**

- 107 1. Anderson RM, May RM. Infectious diseases of humans. Oxford: Oxford University  
108 Press; 1991.
- 109 2. Drake JM, Bakach I, Just MR, O'Regan SM, Gambhir M, Fung IC-H. Transmission  
110 Models of Historical Ebola Outbreaks. Emerging Infectious Disease journal.  
111 2015;21(8):1447.
- 112 3. Vynnycky E, White RG. An Introduction to Infectious Disease Modelling. Oxford:  
113 Oxford University Press; 2010.
- 114 4. Li Q, Guan X, Wu P, Wang X, Zhou L, Tong Y, et al. Early Transmission Dynamics in  
115 Wuhan, China, of Novel Coronavirus-Infected Pneumonia. N Engl J Med. 2020 Jan 29.
- 116 5. National Health Commission of the People's Republic of China. 2020 [cited Feb 2,  
117 2020]; Available from: <http://www.nhc.gov.cn/>
- 118 6. Centre for Health Protection, Department of Health, The Government for the Hong  
119 Kong Special Administrative Region. 2020 [cited Feb 2, 2020]; Available from:  
120 <https://www.chp.gov.hk/en/index.html>
- 121 7. John Hopkins University Center for Systems Science and Engineering. 2019 Novel  
122 Coronavirus COVID-19 (2019-nCoV) Data Repository by Johns Hopkins CSSE. 2020 [cited  
123 Feb 13, 2020]; Available from: <https://github.com/CSSEGISandData/COVID-19>
- 124 8. Du Z, Wang L, Cauchemez S, Xu X, Wang X, Cowling BJ, et al. Risk for transportation  
125 of 2019 novel coronavirus disease from Wuhan to other cities in China. Emerging  
126 Infectious Disease journal. 2020;26(5):in press.
- 127 9. Wu JT, Leung K, Leung GM. Nowcasting and forecasting the potential domestic and  
128 international spread of the 2019-nCoV outbreak originating in Wuhan, China: a modelling  
129 study. Lancet. 2020 Jan 31.
- 130 10. Volz E, Baguelin M, Bhatia S, Boonyasiri A, Cori A, Cucunubá Z, et al. Report 5:  
131 Phylogenetic analysis of SARS-CoV-2. 2020 [cited Feb 15, 2020]; Available from:  
132 [https://www.imperial.ac.uk/media/imperial-college/medicine/sph/ide/gida-  
133 fellowships/Imperial-College---COVID-19---genetic-analysis-FINAL.pdf](https://www.imperial.ac.uk/media/imperial-college/medicine/sph/ide/gida-fellowships/Imperial-College---COVID-19---genetic-analysis-FINAL.pdf)
- 134 11. Maier BF, Brockmann D. Effective containment explains sub-exponential growth in  
135 confirmed cases of recent COVID-19 outbreak in Mainland China. arXiv. 2020:2002.07572.
- 136 12. Fang G, Li S, Liu Y, Xin N, Ma K. People beyond the statistics: Died of "normal  
137 pneumonia"? [统计数字之外的人：他们死于“普通肺炎”？]. Caijing Zachi [财经杂志]  
138 (Finance and Economics Magazine) 2020 [cited Feb 13, 2020]; Available from:  
139 [https://web.archive.org/web/20200213190623/http://www.sohu.com/a/370032279\\_12  
140 0094087](https://web.archive.org/web/20200213190623/http://www.sohu.com/a/370032279_120094087)

141

142

143 **Figure legend**

144 **Figure 1.** The harmonic mean doubling time (Panel A) and the number of times the COVID-19 epidemic  
145 cumulative incidence has doubled (Panel B) by province in mainland China, from January 20 through  
146 February 9, 2020.

147



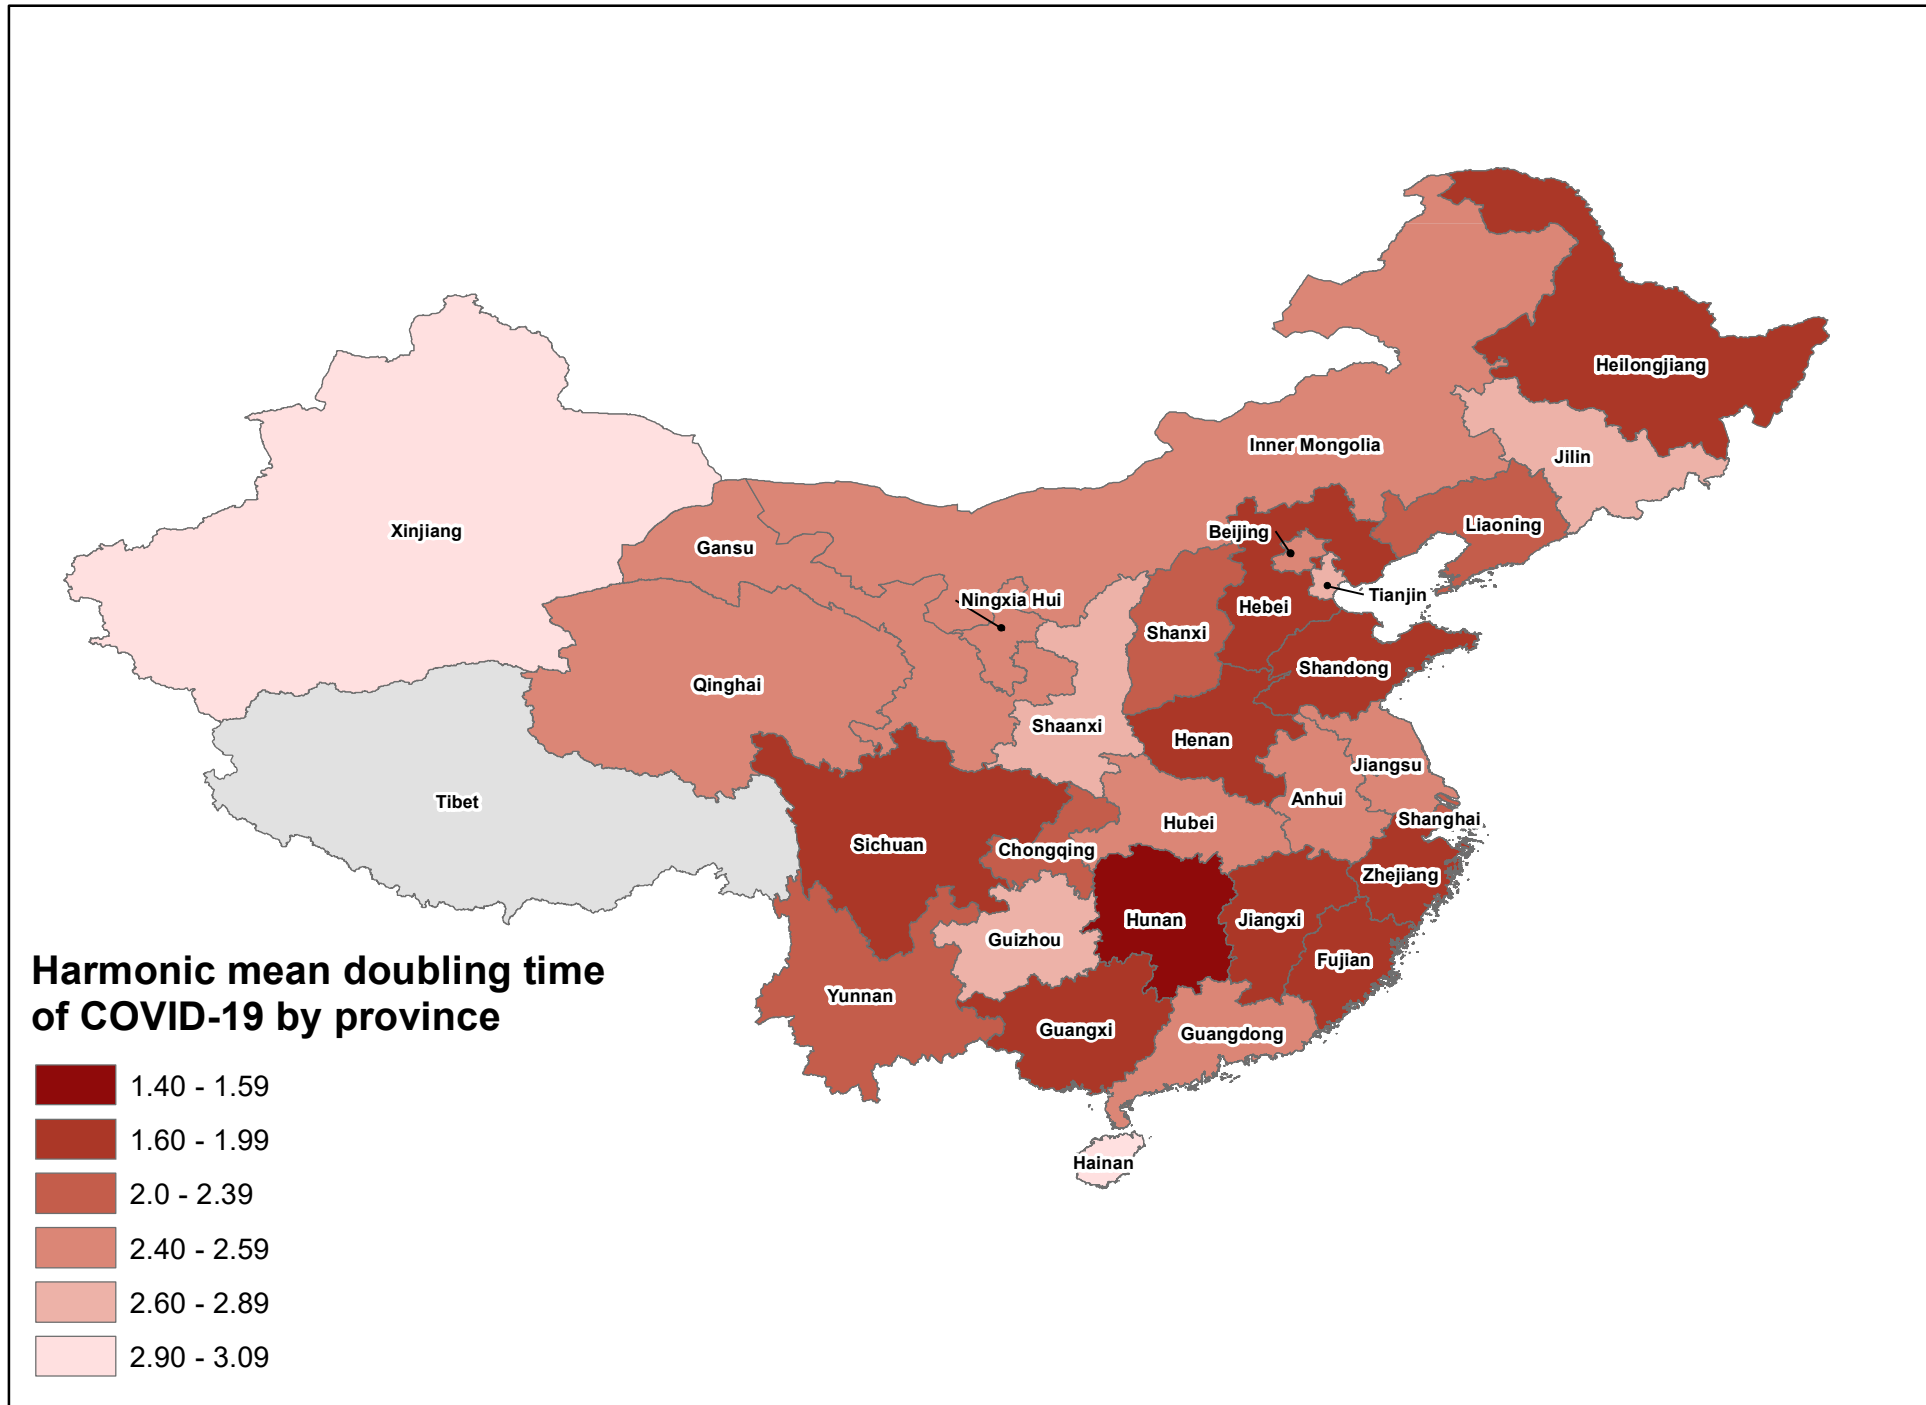

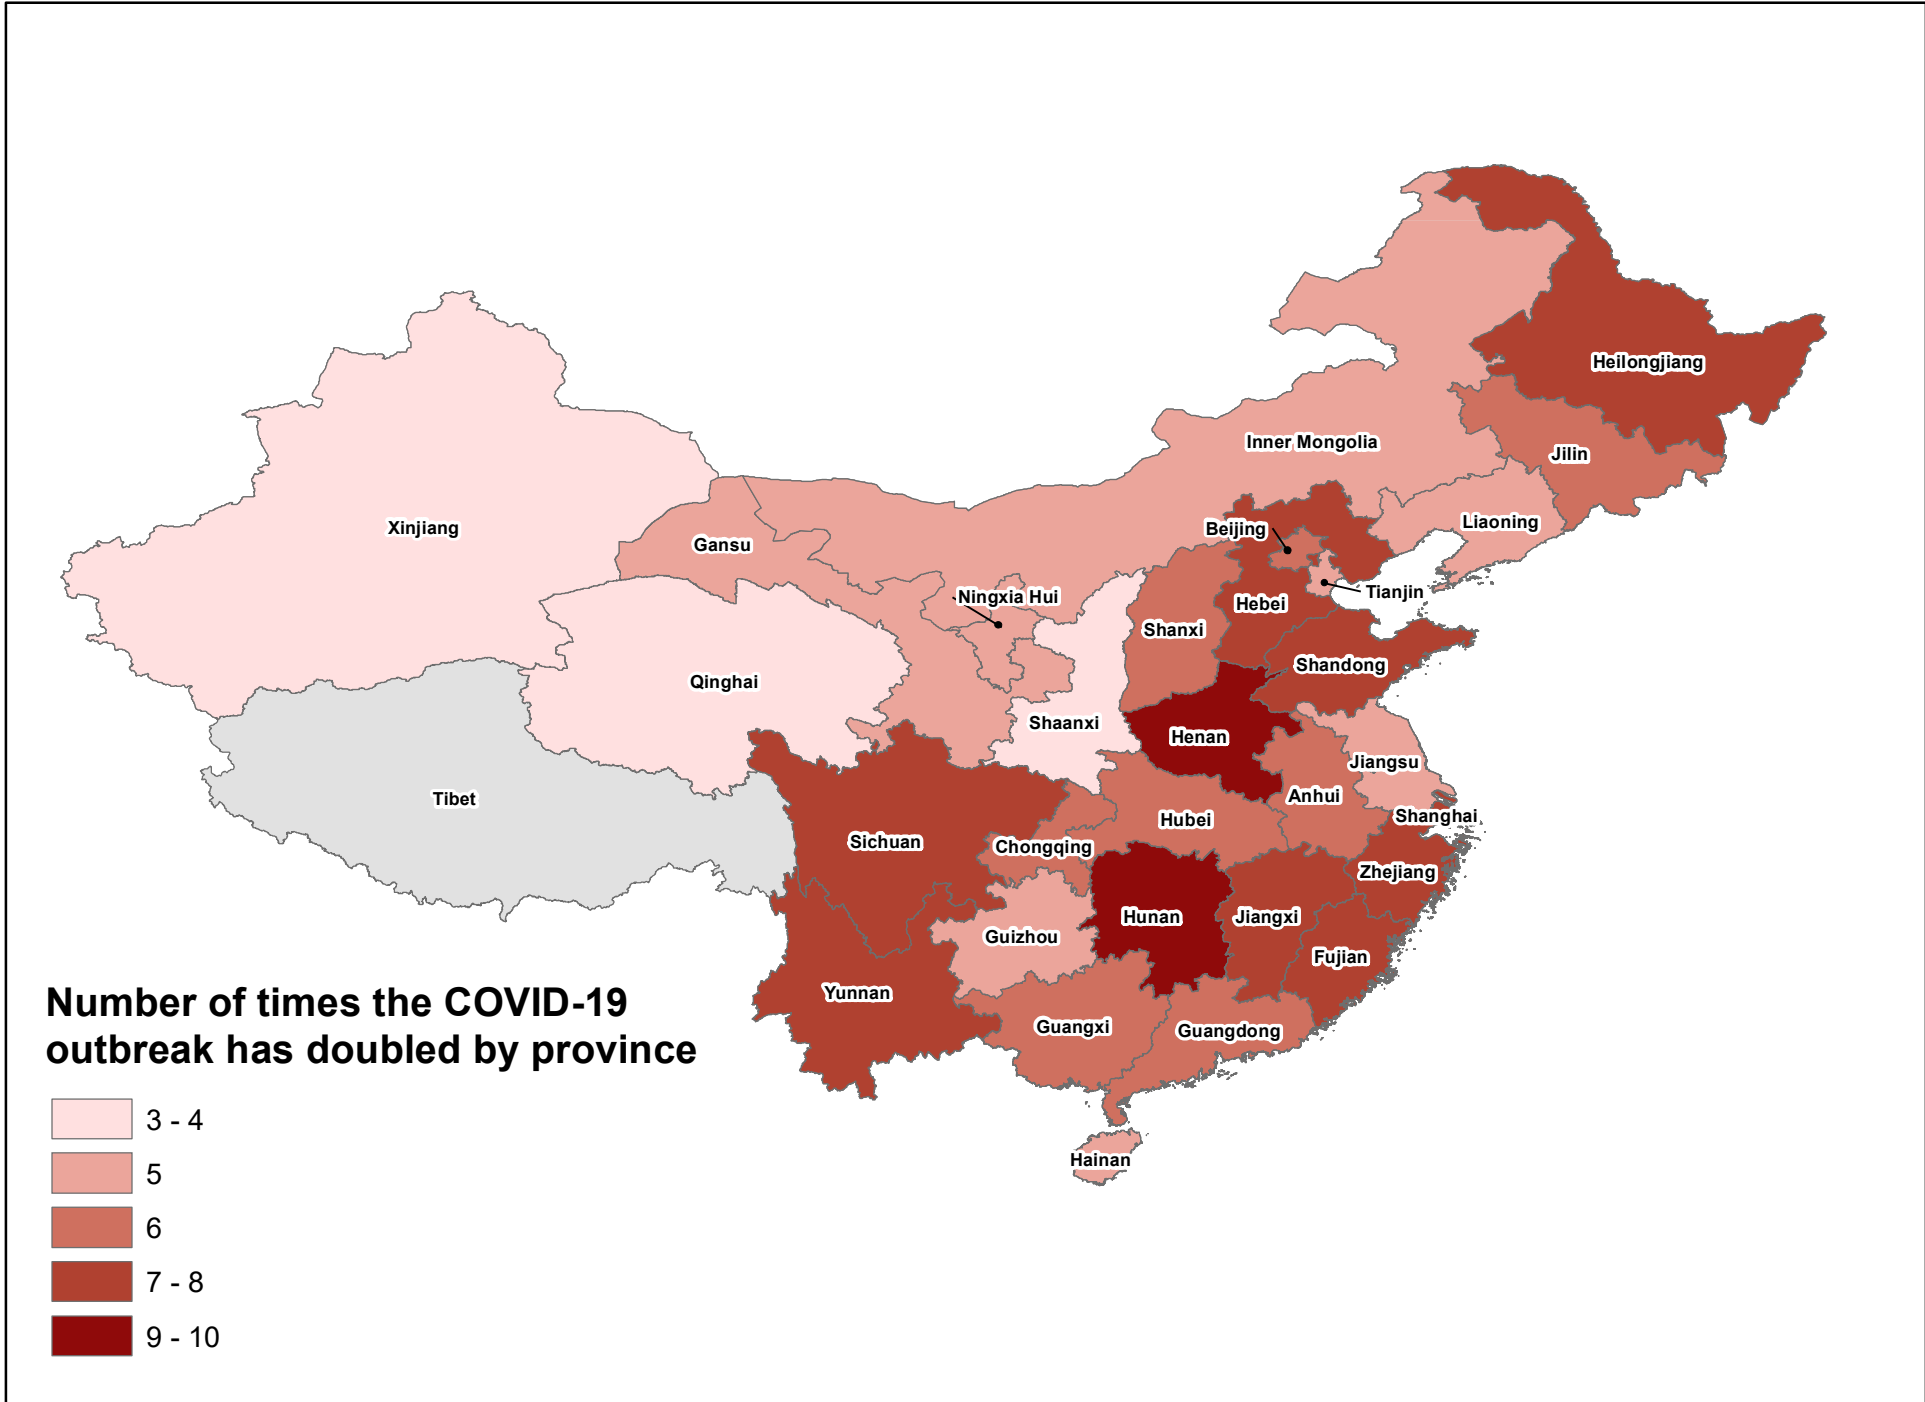

## **Epidemic doubling time of the COVID-19 outbreak by Chinese province**

### **Technical Appendix 1**

Kamalich Muniz-Rodriguez, MPH<sup>1</sup>; Gerardo Chowell, PhD<sup>1</sup>; Chi-Hin Cheung, MS; Dongyu Jia, PhD; Po-Ying Lai, MS; Yiseul Lee, MPH, Manyun Liu, MS; Sylvia K. Ofori, MPH; Kimberlyn M. Roosa, MPH; Lone Simonsen, PhD; Cecile Viboud, PhD; Isaac Chun-Hai Fung, PhD

<sup>1</sup> These authors contribute equally as co-first authors

Author affiliations: Georgia Southern University (K. Muniz-Rodriguez, D. Jia, M. Liu, S. K. Ofori, I. C.-H. Fung); Georgia State University (G. Chowell, Y. Lee, K. M. Roosa); Independent researcher (C.-H. Cheung); Boston University (P.-Y. Lai), Roskilde University (L. Simonsen), The National Institutes of Health (G. Chowell, C. Viboud)

Please address correspondence to Isaac Chun-Hai Fung, PhD, Department of Biostatistics, Epidemiology and Environmental Health Sciences, Jiann-Ping Hsu College of Public Health, Georgia Southern University, Statesboro, GA 30460, USA. +1 912 478 5079. Email: [cfung@georgiasouthern.edu](mailto:cfung@georgiasouthern.edu)

## Technical appendix 1

### Additional information on our motivation, scope and methods

*Motivation.*  $R_0$  is a widely used indicator of transmission potential in a totally susceptible population and is driven by the average contact rate and the mean infectious period of the disease (1). Yet, it only characterizes transmission potential at the onset of the epidemic and varies geographically for a given infectious disease according to local healthcare provision, outbreak response, as well as socioeconomic and cultural factors. Furthermore, estimating  $R_0$  requires information about the natural history of the infectious disease. Thus, our ability to estimate reproduction numbers for novel infectious diseases is hindered by the paucity of information about their epidemiological characteristics and transmission mechanisms. More informative metrics could synthesize real-time information about the extent to which the epidemic is expanding over time. Such metrics would be particularly useful if they rely on minimal data on the outbreak's trajectory (2).

*Scope and definition.* We restricted our analysis to mainland China in this paper. A 'province' herein encompasses three different types of political sub-divisions of mainland China, namely, a province, a directly administered municipality (Beijing, Chongqing, Shanghai, and Tianjin) and an autonomous region (Guangxi, Inner Mongolia, Ningxia, Tibet, and Xinjiang). Our analysis does not include the Hong Kong Special Administrative Region and the Macau Special Administrative Region, which are under the effective rule of the People's Republic of China through the so-called 'One Country, Two Systems' political arrangements. Likewise, our analysis does not include Taiwan, which is *de facto* governed by a different government (the Republic of China).

*Methods.* Figures 1A, 1B, 2A, 2C and all figures in Technical Appendix 4 were created using R version 3.6.2 (R Core Team). Significance level in this manuscript was a priori decided to be  $\alpha = 0.05$ .

## **Additional information on our results and discussion**

*Cumulative incidence over time.* In Technical Appendix 4, we provided a total of 31 plots of cumulative incidence over time (left panel) and  $\log_{10}$  (cumulative incidence) over  $\log_{10}$  (time) (right panel), for Hubei province, mainland China (except Hubei), and then each of the provinces except Tibet (as there was only one case). Thus, we linearized an exponential curve. If social distancing would have an impact, the slope of the log-log plot would decrease, indicating a decreasing epidemic growth rate.

## **Sensitivity analysis**

We performed a sensitivity analysis by expanding our data analysis to the data since December 31, 2019, when Hubei first reported a cluster of pneumonia cases with unexplained etiology that turned out to be COVID-19. The only difference between the sensitivity analysis and the main analysis is the inclusion of Hubei and Guangdong data from December 31, 2019, through January 19, 2020, because nationwide reporting started on January 20, 2020. The only differences in results were found for Hubei and Guangdong. The harmonic mean doubling time for Hubei was 4.06 (95% CI. 3.86, 4.33), and the cumulative incidence in Hubei doubled nine times from December 31, 2019, through February 9, 2020 (Table S3, Figures S2, S3, S4). The first doubling time of Hubei (Figure S2) was high, reflecting that real-time data was unavailable before mid-January. It was only by January 17, 2020, onwards when data reporting become increasingly transparent and timely.

**Table S1A.** Confirmed cases of COVID-19 (December 31, 2019 to January 19, 2020) by province in mainland China extracted from official government sources used for the sensitivity analysis.

| Locations <sup>1</sup>                                       | Dec | January |    |    |    |    |    |    |    |    |    |    |    |    |    |    |    |    |     |     |    |
|--------------------------------------------------------------|-----|---------|----|----|----|----|----|----|----|----|----|----|----|----|----|----|----|----|-----|-----|----|
|                                                              | 31  | 1       | 2  | 3  | 4  | 5  | 6  | 7  | 8  | 9  | 10 | 11 | 12 | 13 | 14 | 15 | 16 | 17 | 18  | 19  |    |
| Mainland China (Excluding Hubei) (Sum of provincial reports) | NR  | NR      | NR | NR | NR | NR | NR | NR | NR | NR | NR | NR | NR | NR | NR | NR | NR | NR | NR  | NR  | 1  |
| Mainland China (Including Hubei) (Sum of provincial reports) | 27  | NR      | NR | 44 | NR | 59 | NR | NR | NR | NR | 41 | 41 | 41 | 41 | 41 | 41 | 45 | 62 | 121 | 199 |    |
| Mainland China (Including Hubei) (Sum by NCH) <sup>2</sup>   | NA  | NA      | NA | NA | NA | NA | NA | NA | NA | NA | NA | NA | NA | NA | NA | NA | NA | NA | NA  | NA  | NA |
| Hubei                                                        | 27  | NR      | NR | 44 | NR | 59 | NR | NR | NR | NR | 41 | 41 | 41 | 41 | 41 | 41 | 45 | 62 | 121 | 198 |    |
| Guangdong                                                    | NR  | NR      | NR | NR | NR | NR | NR | NR | NR | NR | NR | NR | NR | NR | NR | NR | NR | NR | NR  | NR  | 1  |

*Note.* NA, not applicable. NR, not reported. <sup>1</sup>Observations were collected directly from government official sites from each province in mainland China. If a press release included data reported at midnight and early morning, they were considered to belong to the previous day the data was reported. <sup>2</sup>Official national tally of cumulative case count of confirmed cases was first published by the National Health Commission of China on January 21, 2020 for January 20, 2020 (3).

**Table S1B.** Confirmed cases of COVID-19 (January 20 to 31, 2020) by province in mainland China extracted from official government sources used for the main analysis and sensitivity analysis.

| Locations <sup>1</sup>                                       | January |     |     |     |      |      |      |      |      |      |      |       |
|--------------------------------------------------------------|---------|-----|-----|-----|------|------|------|------|------|------|------|-------|
|                                                              | 20      | 21  | 22  | 23  | 24   | 25   | 26   | 27   | 28   | 29   | 30   | 31    |
| Mainland China (Excluding Hubei) (Sum of provincial reports) | 26      | 71  | 145 | 291 | 585  | 923  | 1321 | 1802 | 2386 | 3126 | 3885 | 4637  |
| Mainland China (Including Hubei) (Sum of provincial reports) | 296     | 446 | 589 | 840 | 1314 | 1975 | 2744 | 4516 | 5940 | 7712 | 9691 | 11790 |
| Mainland China (Including Hubei) (Sum by NCH) <sup>2</sup>   | 291     | 440 | 571 | 830 | 1287 | 1975 | 2744 | 4515 | 5974 | 7711 | 9692 | 11791 |
| Hubei                                                        | 270     | 375 | 444 | 549 | 729  | 1052 | 1423 | 2714 | 3554 | 4586 | 5806 | 7153  |
| Anhui                                                        | 0       | 1   | 9   | 15  | 39   | 60   | 70   | 106  | 152  | 200  | 237  | 297   |
| Beijing                                                      | 5       | 10  | 14  | 26  | 36   | 49   | 68   | 80   | 91   | 111  | 132  | 156   |
| Chongqing                                                    | 0       | 5   | 9   | 27  | 57   | 75   | 110  | 132  | 147  | 165  | 206  | 238   |
| Fujian                                                       | 0       | 0   | 1   | 5   | 10   | 18   | 35   | 59   | 82   | 101  | 120  | 144   |
| Gansu                                                        | 0       | 0   | 0   | 2   | 4    | 7    | 14   | 19   | 24   | 26   | 29   | 35    |
| Guangdong                                                    | 14      | 26  | 32  | 53  | 78   | 98   | 146  | 188  | 241  | 311  | 393  | 520   |
| Guangxi                                                      | 0       | 0   | 2   | 13  | 23   | 33   | 46   | 51   | 58   | 78   | 87   | 100   |
| Guizhou                                                      | 0       | 0   | 0   | 3   | 5    | 5    | 7    | 9    | 9    | 12   | 15   | 29    |
| Hainan                                                       | 0       | 0   | 4   | 8   | 11   | 20   | 27   | 33   | 40   | 46   | 49   | 57    |
| Hebei                                                        | 0       | 0   | 1   | 2   | 8    | 13   | 18   | 33   | 48   | 65   | 82   | 96    |
| Heilongjiang                                                 | 0       | 0   | 1   | 4   | 9    | 15   | 21   | 30   | 37   | 43   | 59   | 80    |
| Henan                                                        | 0       | 1   | 5   | 9   | 32   | 83   | 128  | 168  | 206  | 278  | 352  | 422   |
| Hunan                                                        | 0       | 1   | 4   | 9   | 43   | 69   | 100  | 143  | 221  | 277  | 332  | 389   |
| Inner Mongolia                                               | 0       | 0   | 0   | 1   | 2    | 7    | 11   | 13   | 16   | 18   | 20   | 23    |
| Jiangsu                                                      | 0       | 0   | 1   | 9   | 18   | 31   | 47   | 70   | 99   | 129  | 168  | 202   |
| Jiangxi                                                      | 0       | 2   | 3   | 7   | 18   | 36   | 48   | 72   | 109  | 162  | 240  | 286   |
| Jilin                                                        | 0       | 0   | 1   | 3   | 4    | 4    | 6    | 8    | 9    | 14   | 14   | 17    |
| Liaoning                                                     | 0       | 0   | 2   | 4   | 12   | 19   | 22   | 30   | 36   | 41   | 45   | 60    |
| Ningxia                                                      | 0       | 0   | 1   | 2   | 3    | 4    | 7    | 11   | 12   | 17   | 21   | 26    |
| Qinghai                                                      | 0       | 0   | 0   | 0   | 0    | 1    | 4    | 6    | 6    | 6    | 8    | 9     |
| Shaanxi                                                      | 0       | 0   | 0   | 0   | 7    | 15   | 22   | 46   | 56   | 63   | 87   | 101   |
| Shandong                                                     | 0       | 1   | 1   | 1   | 21   | 39   | 63   | 87   | 87   | 145  | 178  | 202   |
| Shanghai                                                     | 2       | 9   | 16  | 20  | 33   | 40   | 53   | 66   | 80   | 101  | 128  | 153   |
| Shanxi                                                       | 0       | 0   | 1   | 1   | 6    | 9    | 13   | 20   | 27   | 35   | 39   | 47    |
| Sichuan                                                      | 0       | 2   | 5   | 15  | 28   | 44   | 69   | 90   | 108  | 142  | 177  | 207   |
| Tianjin                                                      | 0       | 2   | 4   | 5   | 8    | 10   | 14   | 23   | 25   | 27   | 32   | 32    |
| Tibet                                                        | 0       | 0   | 0   | 0   | 0    | 0    | 0    | 0    | 0    | 1    | 1    | 1     |
| Xinjiang                                                     | 0       | 0   | 0   | 2   | 3    | 4    | 5    | 10   | 13   | 14   | 17   | 18    |
| Yunnan                                                       | 0       | 1   | 1   | 2   | 5    | 11   | 19   | 26   | 51   | 70   | 80   | 91    |
| Zhejiang                                                     | 5       | 10  | 27  | 43  | 62   | 104  | 128  | 173  | 296  | 428  | 537  | 599   |

*Note.* <sup>1</sup>Observations were collected directly from government official sites from each province in mainland China. If a press release included data reported at midnight and early morning, they were considered to belong to the previous day the data was reported. <sup>2</sup>Data was collected of press releases of the National Health Commission of China (3).

**Table S1C.** Confirmed cases of COVID-19 (February 1 to 9, 2020) by province in mainland China extracted from official government sources used for the main analysis and sensitivity analysis.

| Locations <sup>1</sup>                                       | February |       |       |       |       |       |       |       |       |
|--------------------------------------------------------------|----------|-------|-------|-------|-------|-------|-------|-------|-------|
|                                                              | 1        | 2     | 3     | 4     | 5     | 6     | 7     | 8     | 9     |
| Mainland China (Excluding Hubei) (Sum of provincial reports) | 5396     | 6031  | 6910  | 7646  | 8352  | 9049  | 9614  | 10098 | 10507 |
| Mainland China (Including Hubei) (Sum of provincial reports) | 14381    | 17208 | 20432 | 24324 | 28017 | 31161 | 34567 | 37198 | 40138 |
| Mainland China (Including Hubei) (Sum by NCH) <sup>2</sup>   | 14380    | 17205 | 20438 | 24324 | 28018 | 31161 | 34546 | 37198 | 40171 |
| Hubei                                                        | 9074     | 11177 | 13522 | 16678 | 19665 | 22112 | 24953 | 27100 | 29631 |
| Anhui                                                        | 340      | 408   | 480   | 530   | 591   | 665   | 733   | 779   | 830   |
| Beijing                                                      | 183      | 212   | 228   | 253   | 274   | 297   | 315   | 326   | 337   |
| Chongqing                                                    | 262      | 300   | 337   | 366   | 389   | 411   | 426   | 446   | 468   |
| Fujian                                                       | 159      | 179   | 194   | 205   | 215   | 224   | 239   | 250   | 261   |
| Gansu                                                        | 40       | 51    | 55    | 57    | 62    | 67    | 71    | 79    | 83    |
| Guangdong                                                    | 604      | 683   | 797   | 870   | 944   | 1018  | 1075  | 1120  | 1131  |
| Guangxi                                                      | 111      | 127   | 139   | 150   | 168   | 172   | 183   | 195   | 210   |
| Guizhou                                                      | 38       | 46    | 56    | 64    | 69    | 77    | 89    | 96    | 99    |
| Hainan                                                       | 63       | 70    | 79    | 89    | 100   | 111   | 122   | 128   | 136   |
| Hebei                                                        | 104      | 113   | 126   | 135   | 157   | 171   | 195   | 206   | 218   |
| Heilongjiang                                                 | 95       | 118   | 155   | 190   | 227   | 277   | 295   | 307   | 331   |
| Henan                                                        | 493      | 566   | 675   | 764   | 851   | 914   | 981   | 1033  | 1073  |
| Hunan                                                        | 463      | 521   | 593   | 661   | 711   | 772   | 803   | 838   | 879   |
| Inner Mongolia                                               | 27       | 34    | 35    | 42    | 46    | 50    | 52    | 54    | 58    |
| Jiangsu                                                      | 236      | 271   | 308   | 341   | 373   | 408   | 439   | 468   | 492   |
| Jiangxi                                                      | 333      | 391   | 476   | 548   | 600   | 661   | 698   | 740   | 771   |
| Jilin                                                        | 23       | 31    | 42    | 54    | 59    | 65    | 69    | 78    | 80    |
| Liaoning                                                     | 64       | 73    | 74    | 81    | 89    | 94    | 99    | 105   | 108   |
| Ningxia                                                      | 28       | 31    | 34    | 34    | 40    | 43    | 45    | 45    | 49    |
| Qinghai                                                      | 9        | 13    | 15    | 17    | 18    | 18    | 18    | 18    | 18    |
| Shaanxi                                                      | 116      | 128   | 142   | 165   | 173   | 184   | 195   | 208   | 213   |
| Shandong                                                     | 225      | 246   | 270   | 298   | 343   | 379   | 407   | 435   | 466   |
| Shanghai                                                     | 177      | 193   | 208   | 233   | 254   | 269   | 281   | 292   | 295   |
| Shanxi                                                       | 56       | 66    | 74    | 81    | 90    | 96    | 104   | 115   | 119   |
| Sichuan                                                      | 231      | 254   | 282   | 301   | 321   | 344   | 363   | 386   | 405   |
| Tianjin                                                      | 45       | 48    | 60    | 67    | 69    | 81    | 88    | 90    | 94    |
| Tibet                                                        | 1        | 1     | 1     | 1     | 1     | 1     | 1     | 1     | 1     |
| Xinjiang                                                     | 21       | 24    | 29    | 32    | 36    | 39    | 42    | 45    | 49    |
| Yunnan                                                       | 99       | 109   | 117   | 122   | 128   | 135   | 138   | 140   | 141   |
| Zhejiang                                                     | 661      | 724   | 829   | 895   | 954   | 1006  | 1048  | 1075  | 1092  |

*Note.* <sup>1</sup>Observations were collected directly from government official sites from each province in mainland China. If a press release included data reported at midnight and early morning, they were considered to belong to the previous day the data was reported. <sup>2</sup>Data was collected of press releases of the National Health Commission of China (3).



**Table S2.** Doubling times of COVID-19 cumulative incidence and their harmonic mean (95% Confidence interval) by province in mainland China for the main analysis (January 20 to February 9, 2020).

|                             |    | Mainland China (Except Hubei) | Hubei               | Anhui               | Beijing             | Chongqing           | Fujian              | Gansu               | Guangdong           | Guangxi             | Guizhou             | Hainan              |
|-----------------------------|----|-------------------------------|---------------------|---------------------|---------------------|---------------------|---------------------|---------------------|---------------------|---------------------|---------------------|---------------------|
| Harmonic mean doubling time |    | 1.77<br>(1.53-2.15)           | 2.54<br>(2.42-2.66) | 2.55<br>(2.06-3.08) | 2.49<br>(1.92-3.43) | 2.22<br>(1.58-3.20) | 1.78<br>(1.16-2.52) | 2.55<br>(1.88-3.97) | 2.47<br>(1.96-3.10) | 1.92<br>(1.46-2.96) | 2.72<br>(1.92-3.79) | 2.93<br>(2.08-4.04) |
| Times doubled               | 1  | 0.59                          | 2.91                | 2.12                | 1                   | 2.05                | 0.25                | 1                   | 1.33                | 0.18                | 2.5                 | 1                   |
|                             | 2  | 0.86                          | 2.16                | 0.75                | 1.5                 | 0.56                | 0.5                 | 1.14                | 1.79                | 0.36                | 3.5                 | 1.55                |
|                             | 3  | 0.98                          | 1.5                 | 2.18                | 1.8                 | 0.82                | 0.85                | 1.26                | 2.17                | 0.76                | 1.64                | 2.28                |
|                             | 4  | 1                             | 2.17                | 1.77                | 2.7                 | 1.71                | 1.15                | 4.1                 | 2.38                | 1.6                 | 2.56                | 5.31                |
|                             | 5  | 1.3                           | 3.03                | 4.03                | 4.14                | 3.58                | 1.07                | 5.9                 | 2.76                | 3.4                 | 5.8                 | 6.86                |
|                             | 6  | 1.98                          | 3.43                | 4.9                 | 7.31                | 4.82                | 1.39                |                     | 4.92                | 4.78                |                     |                     |
|                             | 7  | 2.55                          |                     |                     |                     |                     | 3.12                |                     |                     |                     |                     |                     |
|                             | 8  | 4.53                          |                     |                     |                     |                     | 9.21                |                     |                     |                     |                     |                     |
| Harmonic mean doubling time |    | 1.87<br>(1.58-2.65)           | 1.94<br>(1.76-2.35) | 1.81<br>(1.35-2.11) | 1.41<br>(1.24-2.02) | 2.42<br>(1.75-3.86) | 2.43<br>(1.72-3.28) | 1.73<br>(1.46-2.34) | 2.66<br>(2.22-3.40) | 2.13<br>(1.50-3.46) | 2.53<br>(1.71-4.25) | 2.52<br>(1.67-4.50) |
| Times doubled               | 1  | 1                             | 0.33                | 0.25                | 0.33                | 1                   | 2                   | 1.25                | 0.5                 | 1                   | 1                   | 0.33                |
|                             | 2  | 0.33                          | 0.67                | 0.5                 | 0.67                | 0.4                 | 1.31                | 0.84                | 2.5                 | 0.5                 | 2                   | 0.67                |
|                             | 3  | 0.67                          | 0.8                 | 1                   | 0.8                 | 0.85                | 1.75                | 0.72                | 2                   | 1.07                | 1.25                | 4                   |
|                             | 4  | 1.6                           | 1.36                | 0.55                | 0.4                 | 2.75                | 2.32                | 0.96                | 3.66                | 2.76                | 2.55                | 4.5                 |
|                             | 5  | 1.33                          | 2.12                | 0.7                 | 0.47                | 4.71                | 4.07                | 1.89                | 2.43                | 4.67                | 4.53                |                     |
|                             | 6  | 2.01                          | 2.95                | 0.62                | 1.13                |                     |                     | 1.69                | 3.74                |                     |                     |                     |
|                             | 7  | 5.28                          | 3.04                | 1.38                | 1.85                |                     |                     | 1.99                |                     |                     |                     |                     |
|                             | 8  |                               | 3.31                | 2.69                | 1.97                |                     |                     | 4.16                |                     |                     |                     |                     |
|                             | 9  |                               |                     | 3.57                | 4.22                |                     |                     |                     |                     |                     |                     |                     |
|                             | 10 |                               |                     | 6.56                |                     |                     |                     |                     |                     |                     |                     |                     |
| Harmonic mean doubling time |    | 2.72<br>(1.98-3.71)           | 1.68<br>(1.42-2.35) | 2.21<br>(1.85-2.81) | 2.08<br>(1.63-3.10) | 1.76<br>(1.37-2.61) | 2.67<br>(2.10-3.96) | 0                   | 3.01<br>(2.03-4.93) | 2.06<br>(1.33-2.78) | 1.94<br>(1.63-2.56) |                     |
| Times doubled               | 1  | 1.33                          | 2.05                | 0.28                | 1.2                 | 0.66                | 1                   | 0                   | 2                   | 2                   | 1                   |                     |
|                             | 2  | 2.24                          | 0.1                 | 0.57                | 0.4                 | 0.64                | 2                   |                     | 1.6                 | 0.66                | 0.58                |                     |
|                             | 3  | 3.76                          | 0.19                | 1.15                | 1.06                | 0.77                | 2.22                |                     | 3.06                | 0.84                | 1.23                |                     |
|                             | 4  |                               | 0.41                | 1.92                | 1.76                | 1.18                | 4.78                |                     | 5.34                | 1.12                | 1.61                |                     |
|                             | 5  |                               | 0.86                | 2.92                | 2.2                 | 1.55                | 3.57                |                     |                     | 1.61                | 2.29                |                     |
|                             | 6  |                               | 1.43                | 3.16                | 4.18                | 2.78                |                     |                     |                     | 1.45                | 1.47                |                     |
|                             | 7  |                               | 2.66                | 6.13                |                     | 4.49                |                     |                     |                     | 7.32                | 3.48                |                     |
|                             | 8  |                               | 4.71                |                     |                     |                     |                     |                     |                     |                     |                     |                     |

**Table S3. Sensitivity analysis:** Doubling times of COVID-19 cumulative incidence and their harmonic mean (95% Confidence interval) by province in mainland China for the sensitivity analysis (December 31, 2019 to February 9, 2020).

|                             |    | Mainland China (Except Hubei) | Hubei               | Anhui               | Beijing             | Chongqing           | Fujian              | Gansu               | Guangdong           | Guangxi             | Guizhou             | Hainan              |
|-----------------------------|----|-------------------------------|---------------------|---------------------|---------------------|---------------------|---------------------|---------------------|---------------------|---------------------|---------------------|---------------------|
| Harmonic mean doubling time |    | 1.32<br>(1.28-1.42)           | 4.06<br>(3.86-4.33) | 2.53<br>(2.06-3.07) | 2.54<br>(1.95-3.34) | 2.16<br>(1.46-3.14) | 1.79<br>(1.18-2.54) | 2.60<br>(1.93-3.83) | 1.88<br>(1.74-2.21) | 1.92<br>(1.50-2.94) | 2.70<br>(1.87-3.92) | 2.89<br>(1.94-3.87) |
| Times doubled               | 1  | 0.04                          | 17.33               | 2.12                | 1                   | 2.05                | 0.25                | 1                   | 0.07                | 0.18                | 2.5                 | 1                   |
|                             | 2  | 0.08                          | 1.22                | 0.75                | 1.5                 | 0.56                | 0.5                 | 1.14                | 0.16                | 0.36                | 3.5                 | 1.55                |
|                             | 3  | 0.15                          | 2                   | 2.18                | 1.8                 | 0.82                | 0.85                | 1.26                | 0.3                 | 0.76                | 1.64                | 2.28                |
|                             | 4  | 0.33                          | 3.04                | 1.77                | 2.7                 | 1.71                | 1.15                | 4.1                 | 0.63                | 1.6                 | 2.56                | 5.31                |
|                             | 5  | 0.53                          | 2.11                | 4.03                | 4.14                | 3.58                | 1.07                | 5.9                 | 1.84                | 3.4                 | 5.8                 | 6.86                |
|                             | 6  | 0.73                          | 1.23                | 4.9                 | 7.31                | 4.82                | 1.39                |                     | 1.44                | 4.78                |                     |                     |
|                             | 7  | 0.92                          | 2.61                |                     |                     |                     | 3.12                |                     | 2.18                |                     |                     |                     |
|                             | 8  | 0.98                          | 3.13                |                     |                     |                     | 9.21                |                     | 2.59                |                     |                     |                     |
|                             | 9  | 1.01                          | 3.87                |                     |                     |                     |                     |                     | 2.72                |                     |                     |                     |
|                             | 10 | 1.48                          |                     |                     |                     |                     |                     |                     | 6.17                |                     |                     |                     |
|                             | 11 | 2.17                          |                     |                     |                     |                     |                     |                     |                     |                     |                     |                     |
|                             | 12 | 2.88                          |                     |                     |                     |                     |                     |                     |                     |                     |                     |                     |
|                             | 13 | 5.55                          |                     |                     |                     |                     |                     |                     |                     |                     |                     |                     |
| Harmonic mean doubling time |    | 1.92<br>(1.58-2.67)           | 1.93<br>(1.76-2.40) | 1.78<br>(1.29-2.11) | 1.42<br>(1.24-2.05) | 2.41<br>(1.78-3.51) | 2.47<br>(2.00-3.39) | 1.77<br>(1.46-2.38) | 2.72<br>(2.20-3.37) | 2.13<br>(1.46-3.45) | 2.57<br>(1.70-4.42) | 2.46<br>(1.55-5.00) |
| Times doubled               | 1  | 1                             | 0.33                | 0.25                | 0.33                | 1                   | 2                   | 1.25                | 0.5                 | 1                   | 1                   | 0.33                |
|                             | 2  | 0.33                          | 0.67                | 0.5                 | 0.67                | 0.4                 | 1.31                | 0.84                | 2.5                 | 0.5                 | 2                   | 0.67                |
|                             | 3  | 0.67                          | 0.8                 | 1                   | 0.8                 | 0.85                | 1.75                | 0.72                | 2                   | 1.07                | 1.25                | 4                   |
|                             | 4  | 1.6                           | 1.36                | 0.55                | 0.4                 | 2.75                | 2.32                | 0.96                | 3.66                | 2.76                | 2.55                | 4.5                 |
|                             | 5  | 1.33                          | 2.12                | 0.7                 | 0.47                | 4.71                | 4.07                | 1.89                | 2.43                | 4.67                | 4.53                |                     |
|                             | 6  | 2.01                          | 2.95                | 0.62                | 1.13                |                     |                     | 1.69                | 3.74                |                     |                     |                     |
|                             | 7  | 5.28                          | 3.04                | 1.38                | 1.85                |                     |                     | 1.99                |                     |                     |                     |                     |
|                             | 8  |                               | 3.31                | 2.69                | 1.97                |                     |                     | 4.16                |                     |                     |                     |                     |
|                             | 9  |                               |                     | 3.57                | 4.22                |                     |                     |                     |                     |                     |                     |                     |
|                             | 10 |                               |                     | 6.56                |                     |                     |                     |                     |                     |                     |                     |                     |
| Harmonic mean doubling time |    | 2.72<br>(1.92-3.75)           | 1.68<br>(1.43-2.37) | 2.20<br>(1.86-2.86) | 2.11<br>(1.70-3.10) | 1.84<br>(1.39-2.66) | 2.75<br>(2.09-3.82) | 0                   | 2.98<br>(2.08-5.00) | 2.03<br>(1.38-2.89) | 1.89<br>(1.60-2.52) |                     |
| Times doubled               | 1  | 1.33                          | 2.05                | 0.28                | 1.2                 | 0.66                | 1                   | 0                   | 2                   | 2                   | 1                   |                     |
|                             | 2  | 2.24                          | 0.1                 | 0.57                | 0.4                 | 0.64                | 2                   |                     | 1.6                 | 0.66                | 0.58                |                     |
|                             | 3  | 3.76                          | 0.19                | 1.15                | 1.06                | 0.77                | 2.22                |                     | 3.06                | 0.84                | 1.23                |                     |
|                             | 4  |                               | 0.41                | 1.92                | 1.76                | 1.18                | 4.78                |                     | 5.34                | 1.12                | 1.61                |                     |
|                             | 5  |                               | 0.86                | 2.92                | 2.2                 | 1.55                | 3.57                |                     |                     | 1.61                | 2.29                |                     |
|                             | 6  |                               | 1.43                | 3.16                | 4.18                | 2.78                |                     |                     |                     | 1.45                | 1.47                |                     |
|                             | 7  |                               | 2.66                | 6.13                |                     | 4.49                |                     |                     |                     | 7.32                | 3.48                |                     |
|                             | 8  |                               | 4.71                |                     |                     |                     |                     |                     |                     |                     |                     |                     |

**Figure S1A.** The harmonic mean (red circle) with 95% confidence interval (red bar) of the doubling times (days), and their values (black square) by the number of times the reported cumulative incidence doubles by province within mainland China (A to I) from January 20, 2020 through February 9, 2020. Each panel represents a province except the panel representing “Mainland China (except Hubei)” that is the aggregate of all other provinces in mainland China, except Hubei.

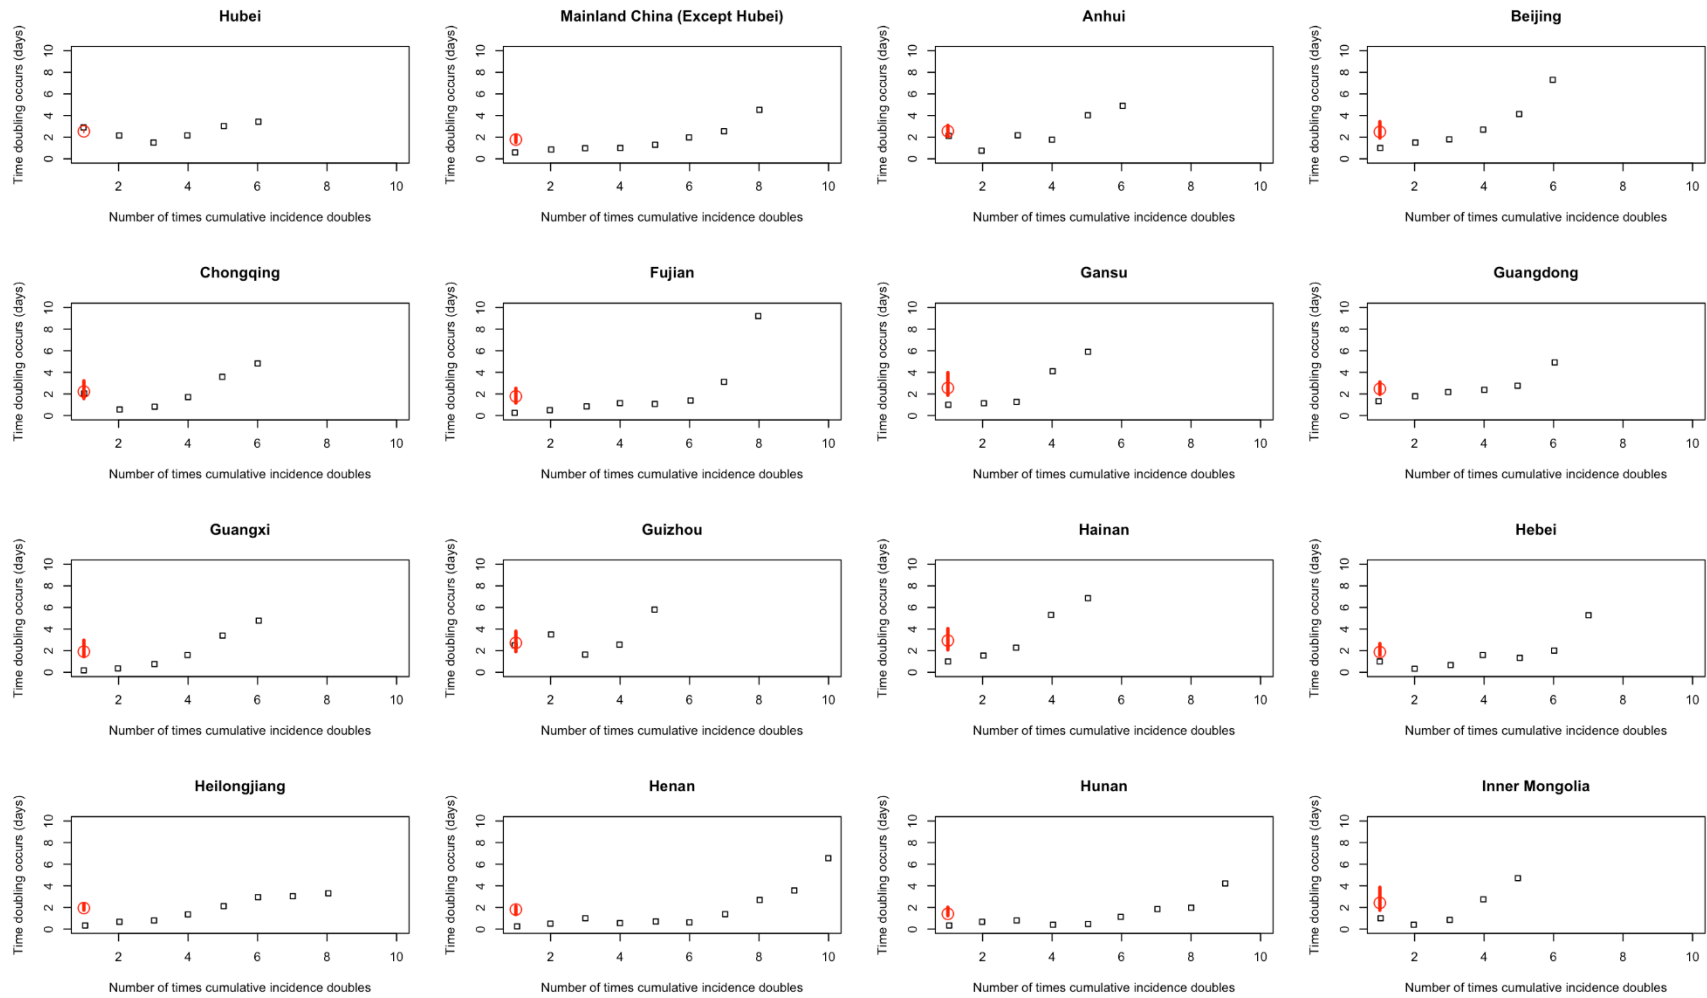

**Figure S1B.** The harmonic mean (red circle) with 95% confidence interval (red bar) of the doubling times (days), and their values (black square) by the number of times the reported cumulative incidence doubles by province within mainland China (J to Z) from January 20, 2020 through February 9, 2020. Each panel represents a province. Doubling time for Tibet is not available, because there had only been 1 confirmed case in Tibet as of February 9, 2020.

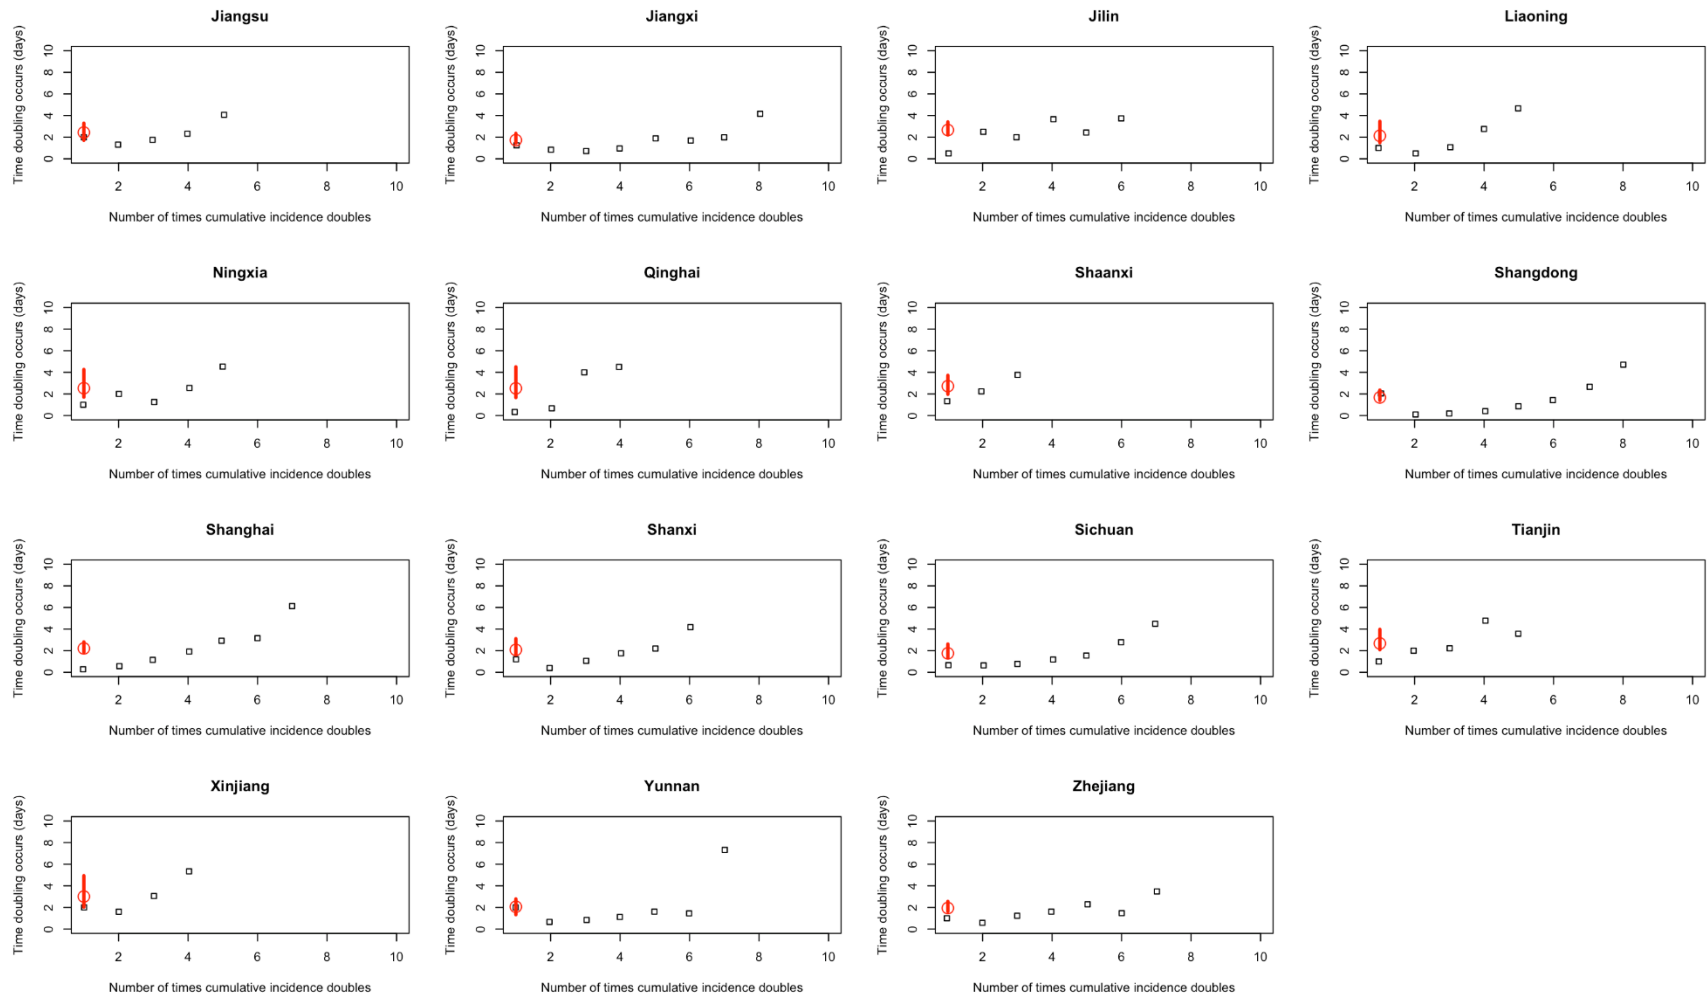

**Figure S2. Sensitivity analysis:** The harmonic mean (circle) with 95% confidence interval (bar) (main analysis: red; sensitivity analysis: blue) of the doubling times (days), and their values (black square) by the number of times the reported cumulative incidence doubles in Hubei (upper panels), aggregate of mainland China (except Hubei) (middle panels), and Guangdong (lower panels), from December 31, 2019 through February 9, 2020.

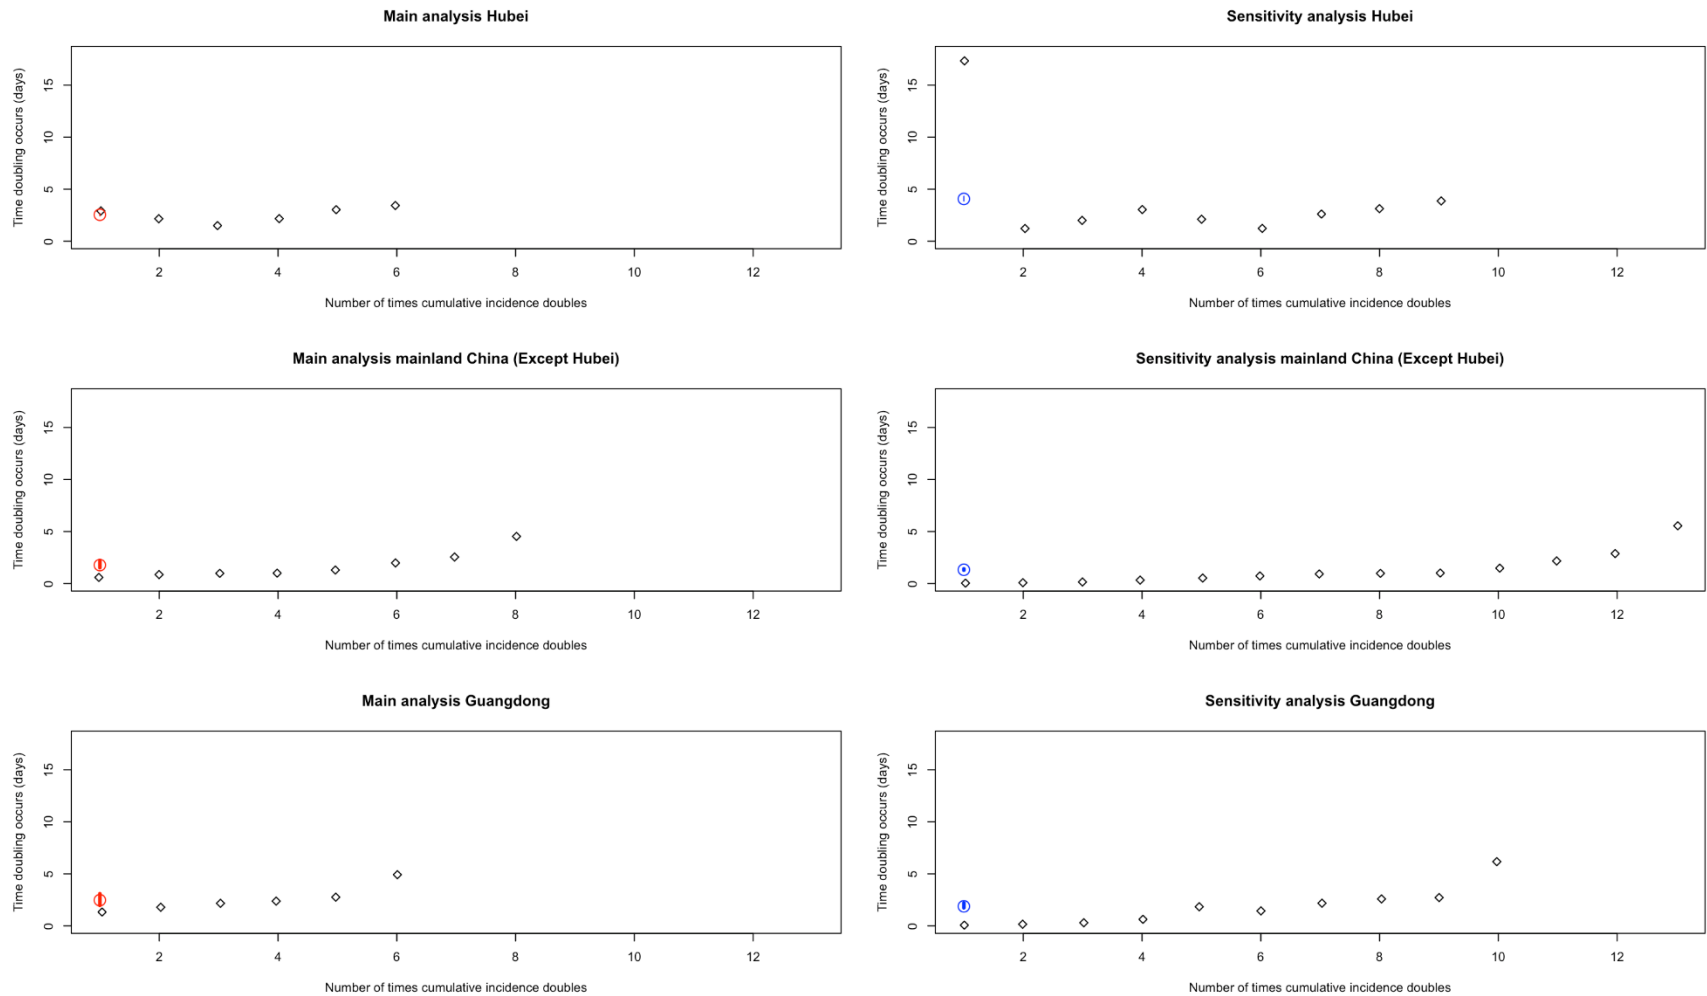

**Figure S3.** Sensitivity analysis: The harmonic mean doubling time of COVID-19 by province in mainland China, from December 31, 2019 through February 9, 2020.

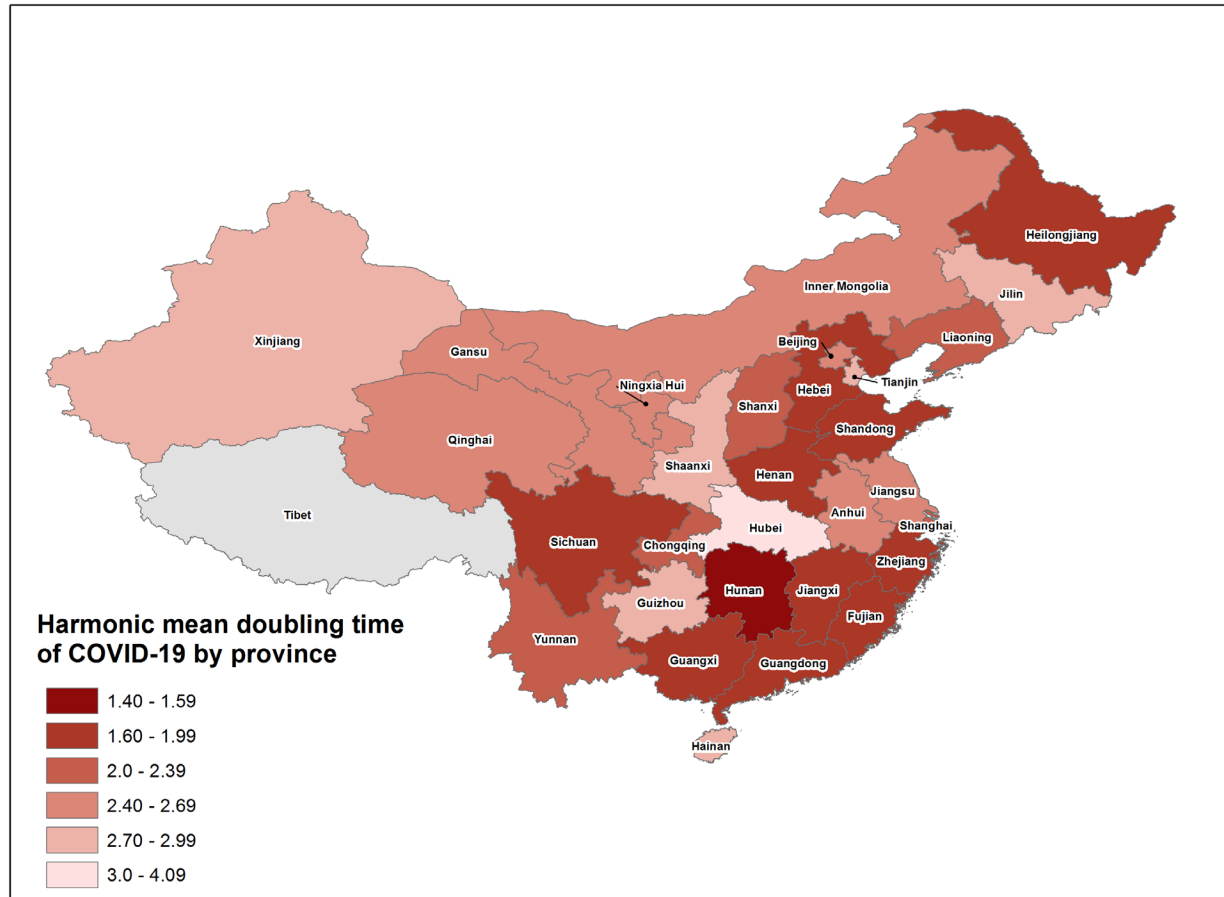

**Figure S4.** Sensitivity analysis: The number of times the COVID-19 outbreak has doubled by province in mainland China, from December 31, 2019 through February 9, 2020.

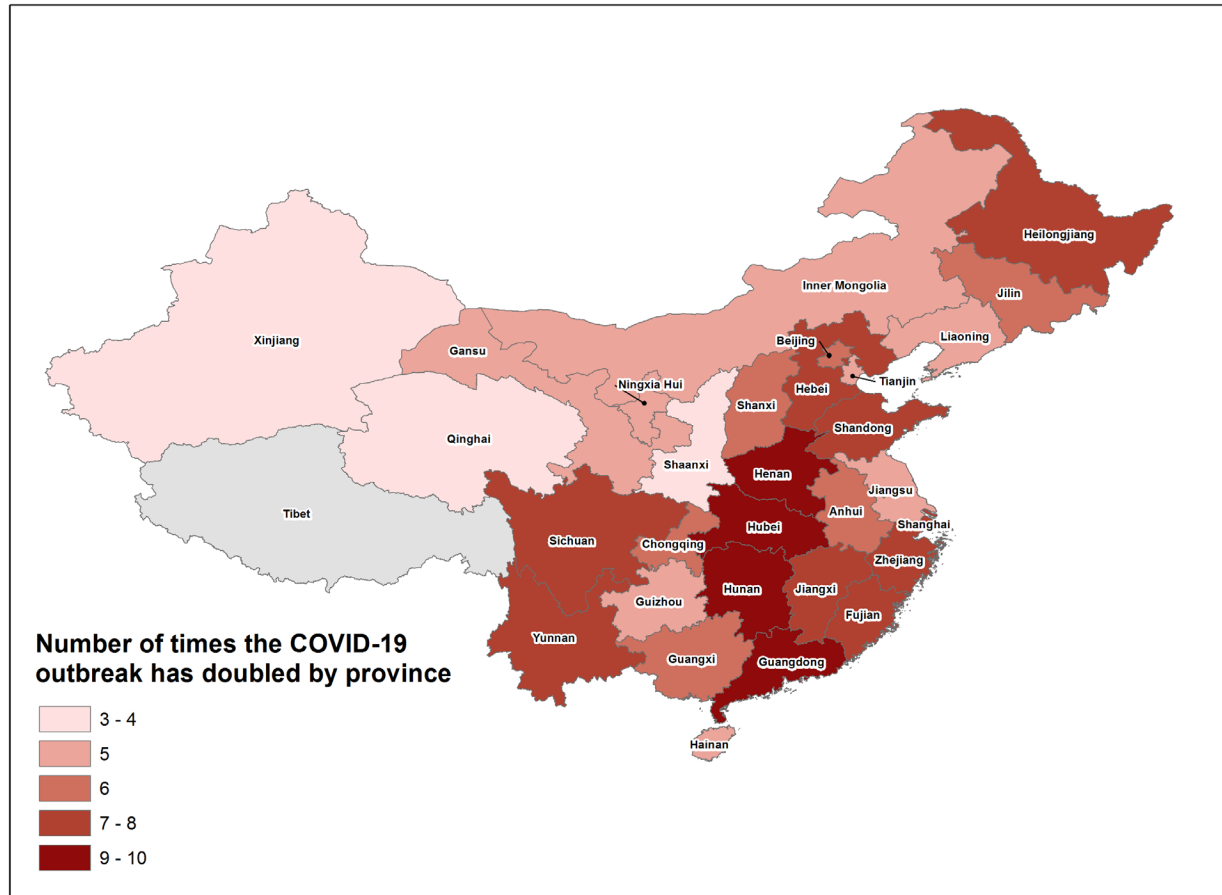

## **Authors' contributions**

Project management: Dr. Gerardo Chowell, Dr. Isaac Chun-Hai Fung and Ms. Kamalich Muniz-Rodriguez

Manuscript writing: Dr. Isaac Chun-Hai Fung and Dr. Gerardo Chowell

Manuscript editing and data interpretation: Ms. Kamalich Muniz-Rodriguez, Dr. Gerardo Chowell, Dr. Isaac Chun-Hai Fung, Dr. Lone Simonsen, and Dr. Cecile Viboud

MATLAB code: Dr. Gerardo Chowell

Doubling time calculation using MATLAB and presentation of results: Ms. Kamalich Muniz-Rodriguez, Dr. Gerardo Chowell and Dr. Isaac Chun-Hai Fung

Statistical analysis in R: Dr. Isaac Chun-Hai Fung, Ms. Kamalich Muniz-Rodriguez

Data management and quality check of epidemic data entry: Ms. Kamalich Muniz-Rodriguez, Dr. Isaac Chun-Hai Fung

Curation of epidemic data for countries and territories outside mainland China (including Hong Kong, Macao and Taiwan): Ms. Kamalich Muniz-Rodriguez and Ms. Sylvia K. Ofori

Curation of epidemic data for provinces in mainland China: Ms. Manyun Liu (from the early reports, up to Jan 24, 2020 data), Ms. Po-Ying Lai (since Jan 25, 2020 data to today), Mr. Chi-Hin Cheung (since Jan 27, 2020 data to today), and Ms. Kamalich Muniz-Rodriguez and Dr. Isaac Chun-Hai Fung (whenever there is a back-log).

Retrieval of epidemic data from official websites (downloading and archiving of China's national and provincial authorities' press releases): Ms. Manyun Liu and Dr. Dongyu Jia (at the very beginning of our project)

Retrieval of statistical data from the official website of National Bureau of Statistics of the People's Republic of China: Mr. Chi-Hin Cheung

Retrieval of publicly available statistical data from various sources: Ms. Yiseul Lee, Dr. Isaac Chun-Hai Fung

Map creation: Ms. Kimberlyn M. Roosa

Literature review assistance: Ms. Sylvia K. Ofori

Plots of log cumulative incidence versus time: Ms. Sylvia K. Ofori

Technical Appendix 2: Dr. Isaac Chun-Hai Fung, Dr. Gerardo Chowell

Technical Appendix 3: Ms. Manyun Liu, Dr. Isaac Chun-Hai Fung



## References

1. Anderson RM, May RM. Infectious diseases of humans. Oxford: Oxford University Press; 1991.
2. Drake JM, Bakach I, Just MR, O'Regan SM, Gambhir M, Fung IC-H. Transmission Models of Historical Ebola Outbreaks. *Emerging Infectious Disease journal*. 2015;21(8):1447.
3. National Health Commission of the People's Republic of China. 2020 [cited Feb 2, 2020]; Available from: <http://www.nhc.gov.cn/>

## **Epidemic doubling time of the COVID-19 outbreak by Chinese province**

### **Technical Appendix 2**

Kamalich Muniz-Rodriguez, MPH<sup>1</sup>; Gerardo Chowell, PhD<sup>1</sup>; Chi-Hin Cheung, MS; Dongyu Jia, PhD; Po-Ying Lai, MS; Yiseul Lee, MPH, Manyun Liu, MS; Sylvia K. Ofori, MPH; Kimberlyn M. Roosa, MPH; Lone Simonsen, PhD; Cecile Viboud, PhD; Isaac Chun-Hai Fung, PhD

<sup>1</sup> These authors contribute equally as co-first authors

Author affiliations: Georgia Southern University (K. Muniz-Rodriguez, D. Jia, M. Liu, S. K. Ofori, I. C.-H. Fung); Georgia State University (G. Chowell, Y. Lee, K. M. Roosa); Independent researcher (C.-H. Cheung); Boston University (P.-Y. Lai), Roskilde University (L. Simonsen), The National Institutes of Health (G. Chowell, C. Viboud)

Please address correspondence to Isaac Chun-Hai Fung, PhD, Department of Biostatistics, Epidemiology and Environmental Health Sciences, Jiann-Ping Hsu College of Public Health, Georgia Southern University, Statesboro, GA 30460, USA. +1 912 478 5079. Email: [cfung@georgiasouthern.edu](mailto:cfung@georgiasouthern.edu)

## Technical Appendix 2: Harmonic mean doubling time and effective reproductive number

### Doubling time calculation and its relationship with growth rate of an epidemic

As the epidemic grows, the times at which cumulative incidence doubles are given by  $t_{d_i}$  such that

$2C(t_{d_i}) = C(t_{d_{i+1}})$  where  $t_{d_0} = 0$ ,  $C(t_{d_0}) = C_0$ , and  $i = 0, 1, 2, 3, \dots, n_d$  where  $n_d$  is the total number of

times cumulative incidence doubles. The actual sequence of “doubling times” are defined as follows:

$$d_j = \Delta t_{d_j} = t_{d_j} - t_{d_{j-1}} \text{ where } j = 1, 2, 3, \dots, n_d.$$

To quantify parameter uncertainty, we used parametric bootstrapping with a Poisson error structure around the harmonic mean of doubling times  $d_j$  to obtain the 95% confidence interval. See references (1-3) for further details.

Doubling time calculation was conducted using MATLAB R2019b (Mathworks, Natick, MA).

If we assume homogeneous mixing (equal probability of acquiring infection through contacts) and exponential growth, then,  $C(t_2) = C(t_1)\exp(rt)$ , and therefore,  $\ln(C(t_2)/C(t_1)) = rt$ . When  $C(t_2)/C(t_1) = 2$  and thus  $t$  is the doubling time, i.e.  $t = t_d$ ,  $\ln 2 = rt_d$ . Therefore, the doubling time,  $t_d$ , equals to  $(\ln 2)/r$ . See Vynnycky and White (4), panel 4.1, p.74 for further explanation.

### Connecting the harmonic mean doubling time and effective reproductive number

We explored a number of scenarios using parameter values extracted from recent literature, to calculate the effective reproductive number,  $R$ , based on our study’s estimated harmonic mean doubling time from January 20 through February 9, 2020. Instead of basic reproductive number  $R_0$ ,  $R$  was estimated because social distancing measures have been introduced to many parts of China, since the quarantine of Wuhan on January 23, 2020. Our goal is to provide some indications of the uncertainty around the effective reproductive number  $R$  based on the epidemic doubling time that we estimated.

We reviewed parameter values from selected epidemiological literature on COVID-19, listed in Table S4. We chose the harmonic mean doubling time of Hubei (the epicenter), and those of Hunan (lowest), and Xinjiang (highest) for our scenario analysis. We rounded our R estimates to 1 decimal place.

**Part 1.** We made the assumption that the incubation period could be taken as a proxy for pre-infectious period (also known as latent period). We explored *Scenario 1* in which a mean incubation period ( $D_1$ ) of 6.4 days estimated by Backer, Klinkenberg and Wallinga (5) based on 88 cases with known travel history to or from Wuhan, and a mean duration from onset of symptoms to isolation ( $D_2$ ) of 0.7 day estimated by authors from Guangdong Provincial CDC using data of cases after January 19, 2020, in a study using 153 cases confirmed by January 23, 2020. We explored *Scenario 2* using the Guangdong CDC's data with  $D_1 = 4.8$  and  $D_2 = 0.7$ .

Assuming that the pre-infectious period and the infectious period follow the exponential distribution, we used the following equation for  $R_0$  in Vynnycky and White (4), Table 4.1, Equation 4.13, to calculate R:

$$R_0 = (1 + \text{growth rate} \times \text{duration of pre-infectious period}) \\ \times (1 + \text{growth rate} \times \text{duration of infectious period})$$

In mathematical notation,  $R_0 = (1+rD_1)(1+rD_2)$

*Scenario 1.* If  $D_1 = 6.4$  and  $D_2 = 0.7$ , the effective reproductive number, R, in Hubei was 3.3, corresponding to a harmonic mean doubling time of 2.5 days from January 20 through February 9, 2020. In Hunan, with a harmonic mean doubling time of 1.4, the R was 5.6, while in Xinjiang, with a harmonic mean doubling time of 3.0, the R was 2.9 (Table S5).

*Scenario 2.* If  $D_1 = 4.8$  and  $D_2 = 0.7$ , the R in Hubei was 2.8. In Hunan, the R was 4.5, while in Xinjiang, the R was 2.5 (Table S5).

**Part 2.** We used the serial interval ( $T_s$ ) of 7.5 days from Li et al. (6) and 3.96 days from Du et al. (7) explored the scenarios where the ratio between the infectious period and the serial interval,  $f_r$ , is 0.5, 0.75 and 1.

We used the following  $R_0$  equation in Vynnycky and White (4) (Table 4.1 Equation 4.16) to calculate  $R$ :

$R_0 = 1 + \text{growth rate} \times \text{serial interval} + \text{ratio between the infectious period and the serial interval} \times (1 - \text{ratio between the infectious period and the serial interval}) \times (\text{growth rate} \times \text{serial interval})^2$

In mathematical notation,  $R_0 = 1 + rT_s + f_r(1-f_r)(rT_s)^2$

*Scenario 3.* If half of the serial interval of 7.5 days is infectious,  $f_r = 0.5$ , the effective reproductive number,  $R$ , in Hubei was 4.2, corresponding to a harmonic mean doubling time of 2.5 days from January 20 through February 9, 2020. In Hunan, with a harmonic mean doubling time of 1.4 days, the  $R$  was 8.2, while in Xinjiang, with a mean doubling time of 3.0 days, the  $R$  was 3.5 (Table S5).

*Scenario 4.* If three-quarters of the serial interval of 7.5 days is infectious,  $f_r = 0.75$ , the  $R$  in Hubei was 3.9. In Hunan, the  $R$  was 7.3, while in Xinjiang, the  $R$  was 3.3 (Table S5).

*Scenario 5.* If the entire serial interval of 7.5 days is infectious,  $f_r = 1$ , the  $R$  in Hubei was 3.1. In Hunan, the  $R$  was 4.7, while in Xinjiang, the  $R$  was 2.7 (Table S5).

*Scenario 6.* If half of the serial interval of 3.96 days is infectious,  $f_r = 0.5$ , the  $R$  in Hubei was 2.4. In Hunan, the  $R$  was 3.9, while in Xinjiang, the  $R$  was 2.1 (Table S5).

*Scenario 7.* If three-quarters of the serial interval of 3.96 days is infectious,  $f_r = 0.75$ , the  $R$  in Hubei was 2.3. In Hunan, the  $R$  was 3.7, while in Xinjiang, the  $R$  was 2.1 (Table S5).

*Scenario 8.* If the entire serial interval of 3.96 days is infectious,  $f_r = 1$ , the  $R$  in Hubei was 2.1. In Hunan, the  $R$  was 3.0, while in Xinjiang, the  $R$  was 1.9 (Table S5).

**Conclusions.** The effective reproductive number,  $R$ , of COVID-19 in Hubei was in a range of 2.1 to 4.2 in scenarios based on different assumptions and data sources. For provinces with a short mean doubling time, such as Hunan,  $R$  could be in the range of 3.0 to 8.2, while in provinces with a long mean doubling time, such as Xinjiang,  $R$  could be in the range of 1.9 to 3.5. These estimates are meant to illustrate the range of possibilities, as they are critically dependent on the estimates of the other epidemiologic parameters, such as serial intervals.

**Table S4.** Epidemiological parameters of COVID-19 from selected publications.

| Authors and affiliations                                                                                                           | Case data and time range                                                                                                                                                                                                                                                                                                                   | Mean incubation period (days) and data source                                                                                                                                                                                                                                                                  | Mean duration from onset of symptoms to hospitalization and/or isolation (days) and data source                                                                                                                             | Mean serial interval (days) and data source                                          | Basic or effective reproductive number and estimation method                                                                                                                                                              |
|------------------------------------------------------------------------------------------------------------------------------------|--------------------------------------------------------------------------------------------------------------------------------------------------------------------------------------------------------------------------------------------------------------------------------------------------------------------------------------------|----------------------------------------------------------------------------------------------------------------------------------------------------------------------------------------------------------------------------------------------------------------------------------------------------------------|-----------------------------------------------------------------------------------------------------------------------------------------------------------------------------------------------------------------------------|--------------------------------------------------------------------------------------|---------------------------------------------------------------------------------------------------------------------------------------------------------------------------------------------------------------------------|
| <b>Backer, Klinkenberg and Wallinga, 2020(5), National Institute for Public Health and the Environment (RIVM), the Netherlands</b> | Data of 88 cases reported between January 20 and 28 by provincial health commissions with known travel history to and/or from Wuhan, of whom 63 were Wuhan residents traveling elsewhere and 25 were visitors staying in Wuhan for limited period of time.                                                                                 | 6.4 (95% credible interval: 5.6 to 7.7) ranging from 2.1 to 11.1 (2.5 <sup>th</sup> to 97.5 <sup>th</sup> percentile) based on a Weibull distribution. Calculation based on all 88 cases.<br>4.5 (95% credible interval: 3.7 to 5.6), if restricted to the 25 visitors to Wuhan with a closed exposure window. | Not reported.                                                                                                                                                                                                               | Not reported.                                                                        | Not reported.                                                                                                                                                                                                             |
| <b>Du et al., 2020 (7), The University of Texas at Austin</b>                                                                      | Data of 468 cases in mainland China apart from Hubei province between January 21, 2020 and February 8, 2020. Only confirmed cases compiled from press releases from 18 provincial CDC of China were included.                                                                                                                              | Not reported.                                                                                                                                                                                                                                                                                                  | Not reported.                                                                                                                                                                                                               | 3.96 (95% CI 3.53 to 4.39).                                                          | Basic reproductive number: 1.33 estimated using early exponential epidemic growth rate of Jung et al. (8), and Li et al. (6).                                                                                             |
| <b>Ki and Task Force for 2019-nCoV, 2020 (9), The Korean Society for Preventive Medicine &amp; Korean Society of Epidemiology</b>  | The first 24 cases in the Republic of Korea, with date of symptom onset from January 10, 2020 to February 6, 2020. By generation of transmission, 15 were (imported) index cases, 6 were 1 <sup>st</sup> generation and 3 were 2 <sup>nd</sup> generation.                                                                                 | 3.6 (median, 4), ranging from 1 to 9. Calculation was based on 22 symptomatic cases.                                                                                                                                                                                                                           | Mean duration from onset to quarantine or isolation, 4.0, ranging from 0 to 12. Calculation was based on 22 symptomatic cases.                                                                                              | 4.6, ranging from 3 to 9. Calculation was based on all 24 cases.                     | Effective reproductive number: 0.47 (Poisson 95% CI, 0.22 to 0.90; binomial 95% CI, 0.24 to 0.71) across two generations of transmission.                                                                                 |
| <b>Li et al., 2020 (6), China CDC and the University of Hong Kong</b>                                                              | Data of the first 425 confirmed cases reported by China CDC, January 22, 2020. They analyzed epidemic growth rate using cases with illness onset between December 10, 2019 and January 4, 2020.                                                                                                                                            | 5.2 days (95% confidence interval [CI], 4.1 to 7.0). Calculation was based on data from 10 cases only.                                                                                                                                                                                                         | Mean duration from onset to hospital admission: 12.5 (95% CI, 10.3 to 14.8) among 44 cases with illness onset before January 1;<br>9.1 (95% CI, 8.6 to 9.7) among 189 patients with illness onset between January 1 and 11. | 7.5±3.4 (95% CI, 5.3 to 19). Calculation was based on data from 5 clusters of cases. | Basic reproductive number: 2.2 (95% CI, 1.4 to 3.9)<br>A transmission model with zoonotic infections were fitted to onset dates that were not linked to the Hunan Seafood Market to derive the basic reproductive number. |
| <b>Liu et al., 2020 (10), Guangdong Provincial CDC</b>                                                                             | Data of confirmed cases as of January 23, 2020, including the date of exposure, symptom onset and diagnosis. Data from Guangdong Province were extracted from medical records and epidemiological investigations. Data of cases in other locations were extracted from official websites of health authorities of different jurisdictions. | 4.8±2.6 (ranging from 2 to 11) Calculation was based on data from only 16 cases who had travelled to Wuhan and stayed for no more than three days.                                                                                                                                                             | Mean duration from symptom onset to isolation: 2.9±3.0; decrease from 6.7 among cases before January 9, 2020 to 0.7 among cases after January 19, 2020. Calculation was based on data from 153 cases.                       | Not reported                                                                         | Effective reproductive number: 2.90 (95% CI, 2.32 to 3.63) using exponential growth assumptions, and 2.92 (95% CI, 2.28 to 3.67) using maximum likelihood.                                                                |

**Table S5.** Estimates of the effective reproductive number, R, of COVID-19 from January 20 through February 9, 2020, based on the point estimate of the harmonic mean doubling time estimated for Hunan (lowest), Hubei (epicenter) and Xinjiang (highest), using parameter values from different sources.

|                                                                                                                            | Hunan | Hubei | Xinjiang |
|----------------------------------------------------------------------------------------------------------------------------|-------|-------|----------|
| Harmonic mean doubling time from Jan 20 to Feb 9, 2020 as estimated in our study                                           | 1.4   | 2.5   | 3.0      |
| Growth rate = $\ln 2$ / doubling time                                                                                      | 0.5   | 0.3   | 0.2      |
| <b>Part 1. Using equation <math>R_0 = (1+rD_1)(1+rD_2)</math></b>                                                          |       |       |          |
| Scenario 1. Mean incubation period of 6.4 days (5) and mean duration from onset of symptoms to isolation of 0.7 day (10).  |       |       |          |
| R                                                                                                                          | 5.6   | 3.3   | 2.9      |
| Scenario 2. Mean incubation period of 4.8 days (10) and mean duration from onset of symptoms to isolation of 0.7 day (10). |       |       |          |
| R                                                                                                                          | 4.5   | 2.8   | 2.5      |
| <b>Part 2. Using equation <math>R_0 = 1 + rT_s + f_r(1-f_r)(rT_s)^2</math></b>                                             |       |       |          |
| Using the serial interval of 7.5 days from Li et al. (6)                                                                   |       |       |          |
| Ratio between duration of infectious period and serial interval, $f_r$                                                     |       |       |          |
| Scenario 3. If $f_r = 0.5$ ,                                                                                               |       |       |          |
| R                                                                                                                          | 8.2   | 4.2   | 3.5      |
| Scenario 4. If $f_r = 0.75$ ,                                                                                              |       |       |          |
| R                                                                                                                          | 7.3   | 3.9   | 3.3      |
| Scenario 5. If $f_r = 1$ ,                                                                                                 |       |       |          |
| R                                                                                                                          | 4.7   | 3.1   | 2.7      |
| Using the serial interval of 3.96 days from Du et al. (7)                                                                  |       |       |          |
| Ratio between duration of infectious period and serial interval, $f_r$                                                     |       |       |          |
| Scenario 6. If $f_r = 0.5$ ,                                                                                               |       |       |          |
| R                                                                                                                          | 3.9   | 2.4   | 2.1      |
| Scenario 7. If $f_r = 0.75$ ,                                                                                              |       |       |          |
| R                                                                                                                          | 3.7   | 2.3   | 2.1      |
| Scenario 8. If $f_r = 1$ ,                                                                                                 |       |       |          |
| R                                                                                                                          | 3.0   | 2.1   | 1.9      |

All estimates are rounded to 1 decimal place.



## References

1. Banks HT, Hu S, Thompson WC. Modeling and inverse problems in the presence of uncertainty: CRC Press; 2014.
2. Chowell G, Ammon CE, Hengartner NW, Hyman JM. Transmission dynamics of the great influenza pandemic of 1918 in Geneva, Switzerland: Assessing the effects of hypothetical interventions. *J Theor Biol.* 2006 Jul 21;241(2):193-204.
3. Chowell G, Shim E, Brauer F, Diaz-Duenas P, Hyman JM, Castillo-Chavez C. Modelling the transmission dynamics of acute haemorrhagic conjunctivitis: application to the 2003 outbreak in Mexico. *Stat Med.* 2006 Jun 15;25(11):1840-57.
4. Vynnycky E, White RG. An Introduction to Infectious Disease Modelling. Oxford: Oxford University Press; 2010.
5. Backer JA, Klinkenberg D, Wallinga J. Incubation period of 2019 novel coronavirus (2019-nCoV) infections among travellers from Wuhan, China, 20-28 January 2020. *Euro Surveill.* 2020;25(5):10.2807/1560-7917.ES.2020.25.5.2000062.
6. Li Q, Guan X, Wu P, Wang X, Zhou L, Tong Y, et al. Early Transmission Dynamics in Wuhan, China, of Novel Coronavirus-Infected Pneumonia. *N Engl J Med.* 2020 Jan 29.
7. Du Z, Wang L, Xu X, Wu Y, Cowling BJ, Meyers LA. The serial interval of COVID-19 from publicly reported confirmed cases. *medRxiv.* 2020:2020.02.19.20025452.
8. Jung S-m, Akhmetzhanov AR, Hayashi K, Linton NM, Yang Y, Yuan B, et al. Real time estimation of the risk of death from novel coronavirus (2019-nCoV) infection: Inference using exported cases. *medRxiv.* 2020:2020.01.29.20019547.
9. Ki M, nCo VT. Epidemiologic characteristics of early cases with 2019 novel coronavirus (2019-nCoV) disease in Republic of Korea. *Epidemiology and health.* 2020 Feb 9:e2020007.
10. Liu T, Hu J, Kang M, Lin L, Zhong H, Xiao J, et al. Transmission dynamics of 2019 novel coronavirus (2019-nCoV). *bioRxiv.* 2020:Version 1.

## **Epidemic doubling time of the COVID-19 outbreak by Chinese province**

### **Technical Appendix 3**

Kamalich Muniz-Rodriguez, MPH<sup>1</sup>; Gerardo Chowell, PhD<sup>1</sup>; Chi-Hin Cheung, MS; Dongyu Jia, PhD; Po-Ying Lai, MS; Yiseul Lee, MPH, Manyun Liu, MS; Sylvia K. Ofori, MPH; Kimberlyn M. Roosa, MPH; Lone Simonsen, PhD; Cecile Viboud, PhD; Isaac Chun-Hai Fung, PhD

<sup>1</sup> These authors contribute equally as co-first authors

Author affiliations: Georgia Southern University (K. Muniz-Rodriguez, D. Jia, M. Liu, S. K. Ofori, I. C.-H. Fung); Georgia State University (G. Chowell, Y. Lee, K. M. Roosa); Independent researcher (C.-H. Cheung); Boston University (P.-Y. Lai), Roskilde University (L. Simonsen), The National Institutes of Health (G. Chowell, C. Viboud)

Please address correspondence to Isaac Chun-Hai Fung, PhD, Department of Biostatistics, Epidemiology and Environmental Health Sciences, Jiann-Ping Hsu College of Public Health, Georgia Southern University, Statesboro, GA 30460, USA. +1 912 478 5079. Email: [cfung@georgiasouthern.edu](mailto:cfung@georgiasouthern.edu)

**Table S6.** Websites of national and provincial health commissions in mainland China

| <b>Health commission</b>                                            | <b>URL</b>                                                                      | <b>Notes</b>                                                                  |
|---------------------------------------------------------------------|---------------------------------------------------------------------------------|-------------------------------------------------------------------------------|
| <b>National Health Commission of the People's Republic of China</b> | <a href="http://www.nhc.gov.cn">http://www.nhc.gov.cn</a>                       |                                                                               |
| <b>Provincial health commissions</b>                                |                                                                                 |                                                                               |
| Anhui                                                               | <a href="http://wjw.ah.gov.cn/">http://wjw.ah.gov.cn/</a>                       |                                                                               |
| Beijing                                                             | <a href="http://wjw.beijing.gov.cn/">http://wjw.beijing.gov.cn/</a>             |                                                                               |
| Chongqing                                                           | <a href="http://wsjkw.cq.gov.cn/">http://wsjkw.cq.gov.cn/</a>                   |                                                                               |
| Fujian                                                              | <a href="http://fjwsjk.fjsen.com/">http://fjwsjk.fjsen.com/</a>                 |                                                                               |
| Gansu                                                               | <a href="http://wsjk.gansu.gov.cn/">http://wsjk.gansu.gov.cn/</a>               |                                                                               |
| Guangdong                                                           | <a href="http://wsjkw.gd.gov.cn/">http://wsjkw.gd.gov.cn/</a>                   |                                                                               |
| Guangxi                                                             | <a href="http://wsjkw.gxzf.gov.cn/">http://wsjkw.gxzf.gov.cn/</a>               |                                                                               |
| Guizhou                                                             | <a href="http://www.gzhfpc.gov.cn/">http://www.gzhfpc.gov.cn/</a>               |                                                                               |
| Hainan                                                              | <a href="http://wst.hainan.gov.cn/">http://wst.hainan.gov.cn/</a>               |                                                                               |
| Hebei                                                               | <a href="http://www.hebwt.gov.cn/">http://www.hebwt.gov.cn/</a>                 | Our team members found it often inaccessible from Statesboro, GA, USA.        |
| Heilongjiang                                                        | <a href="http://wsjkw.hlj.gov.cn/">http://wsjkw.hlj.gov.cn/</a>                 |                                                                               |
| Henan                                                               | <a href="http://www.hnwsjsw.gov.cn/">http://www.hnwsjsw.gov.cn/</a>             |                                                                               |
| Hubei                                                               | <a href="http://wjw.hubei.gov.cn/">http://wjw.hubei.gov.cn/</a>                 |                                                                               |
| Hunan                                                               | <a href="http://wjw.hunan.gov.cn/">http://wjw.hunan.gov.cn/</a>                 |                                                                               |
| Inner Mongolia                                                      | <a href="http://wjw.nmg.gov.cn/">http://wjw.nmg.gov.cn/</a>                     |                                                                               |
| Jiangsu                                                             | <a href="http://wjw.jiangsu.gov.cn/">http://wjw.jiangsu.gov.cn/</a>             |                                                                               |
| Jiangxi                                                             | <a href="http://hc.jiangxi.gov.cn/">http://hc.jiangxi.gov.cn/</a>               |                                                                               |
| Jilin                                                               | <a href="http://www.jl.gov.cn/">http://www.jl.gov.cn/</a>                       |                                                                               |
| Liaoning                                                            | <a href="http://www.shenyang.gov.cn/">http://www.shenyang.gov.cn/</a>           |                                                                               |
| Ningxia                                                             | <a href="http://wsjkw.nx.gov.cn/index.htm">http://wsjkw.nx.gov.cn/index.htm</a> |                                                                               |
| Qinghai                                                             | <a href="https://wsjkw.qinghai.gov.cn/">https://wsjkw.qinghai.gov.cn/</a>       |                                                                               |
| Shaanxi                                                             | <a href="http://sxwjw.shaanxi.gov.cn/">http://sxwjw.shaanxi.gov.cn/</a>         |                                                                               |
| Shandong                                                            | <a href="http://wsjkw.shandong.gov.cn">http://wsjkw.shandong.gov.cn</a>         | Our team members found it persistently inaccessible from Statesboro, GA, USA. |
| Shanghai                                                            | <a href="http://www.shanghai.gov.cn/">http://www.shanghai.gov.cn/</a>           |                                                                               |
| Shanxi                                                              | <a href="http://wjw.shanxi.gov.cn/">http://wjw.shanxi.gov.cn/</a>               |                                                                               |
| Sichuan                                                             | <a href="http://wsjkw.sc.gov.cn/">http://wsjkw.sc.gov.cn/</a>                   |                                                                               |
| Tianjin                                                             | <a href="http://www.tj.gov.cn/">http://www.tj.gov.cn/</a>                       |                                                                               |
| Tibet                                                               | <a href="http://wjw.xizang.gov.cn/">http://wjw.xizang.gov.cn/</a>               |                                                                               |
| Xinjiang                                                            | <a href="http://www.xjhfp.gov.cn/">http://www.xjhfp.gov.cn/</a>                 |                                                                               |
| Yunnan                                                              | <a href="http://ynswsjkw.yn.gov.cn/">http://ynswsjkw.yn.gov.cn/</a>             |                                                                               |
| Zhejiang                                                            | <a href="https://www.zjwjw.gov.cn">https://www.zjwjw.gov.cn</a>                 |                                                                               |

Notes: If our team was unable to directly retrieve the press release from a provincial health commissions, we will use mainland Chinese media reports that directly reported on the provincial health commissions' announcements. Please note that mainland Chinese media are controlled by the Chinese Communist Party and they could not deviate from the government's announcements.

# Hubei

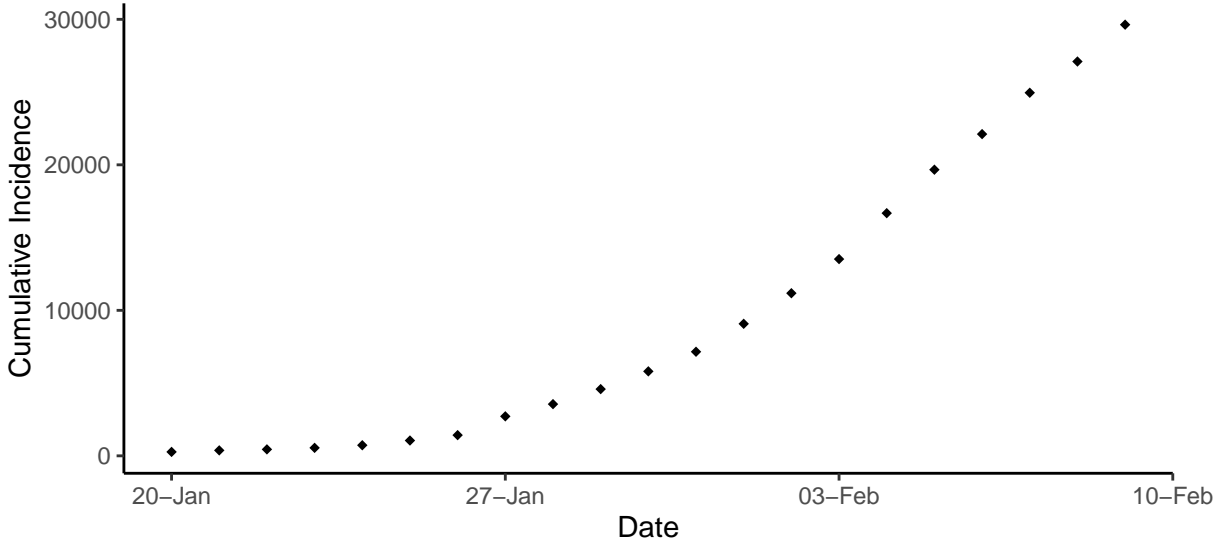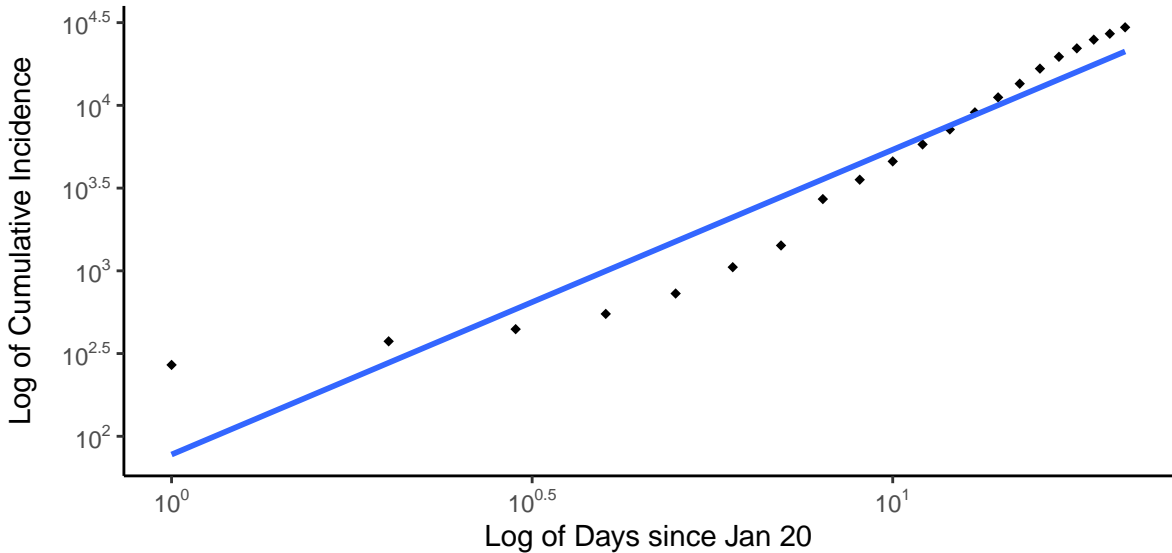

# 'Mainland China (Except Hubei)'

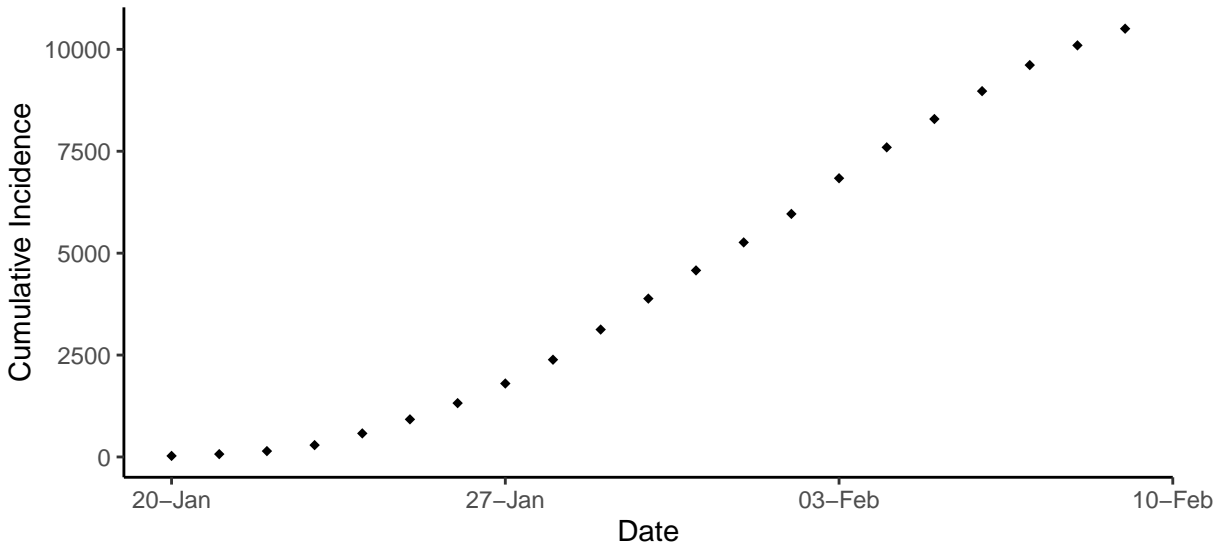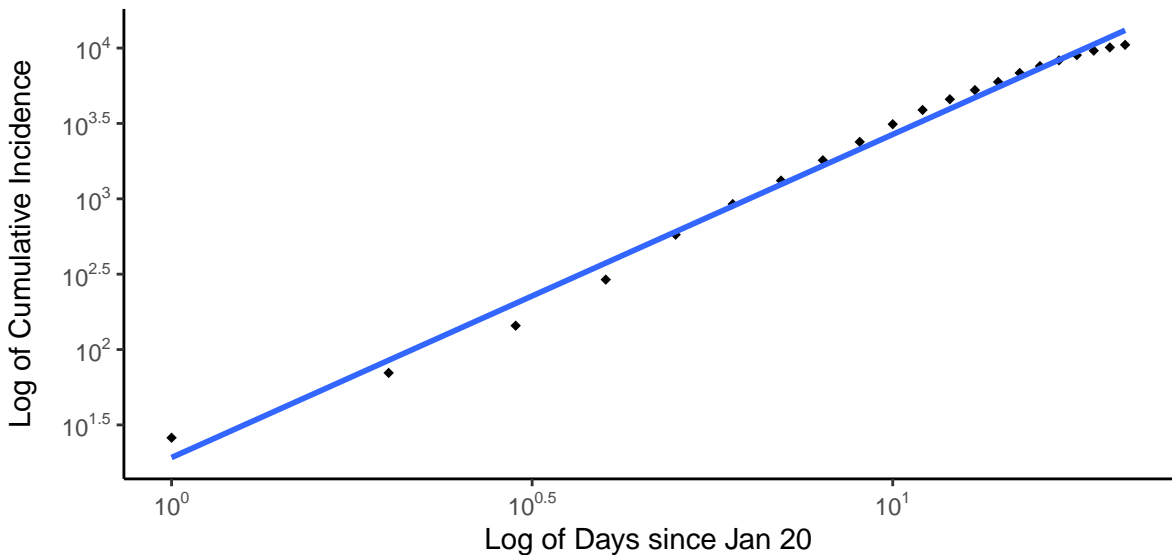

# Anhui

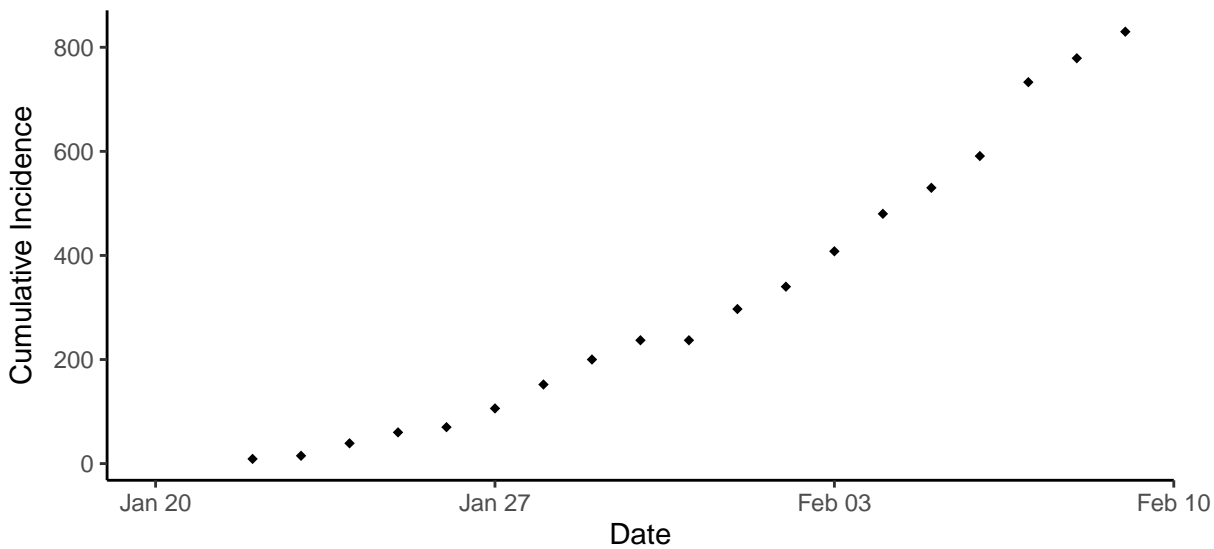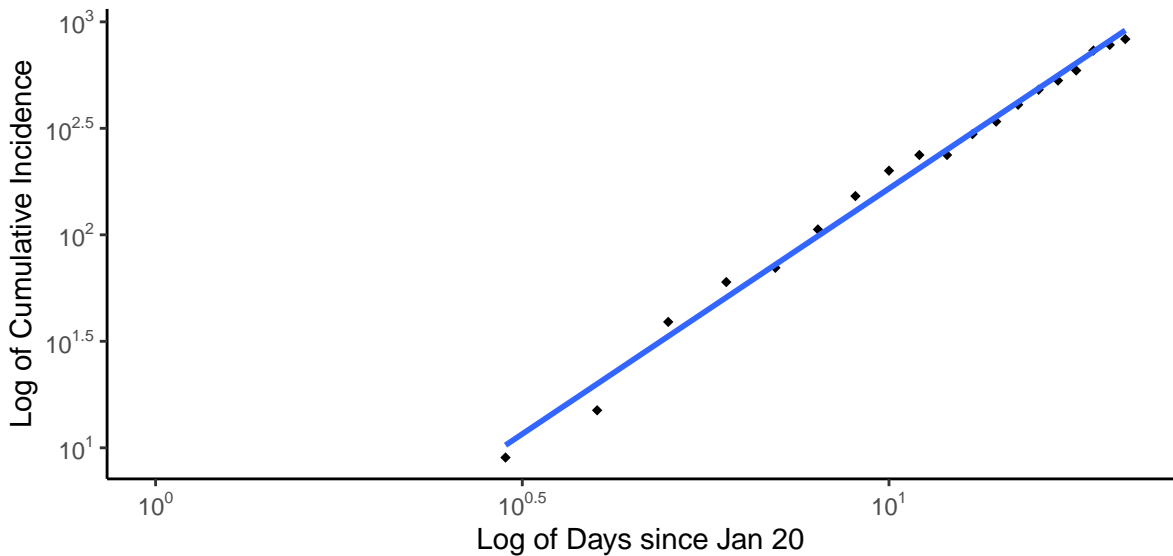

# Beijing

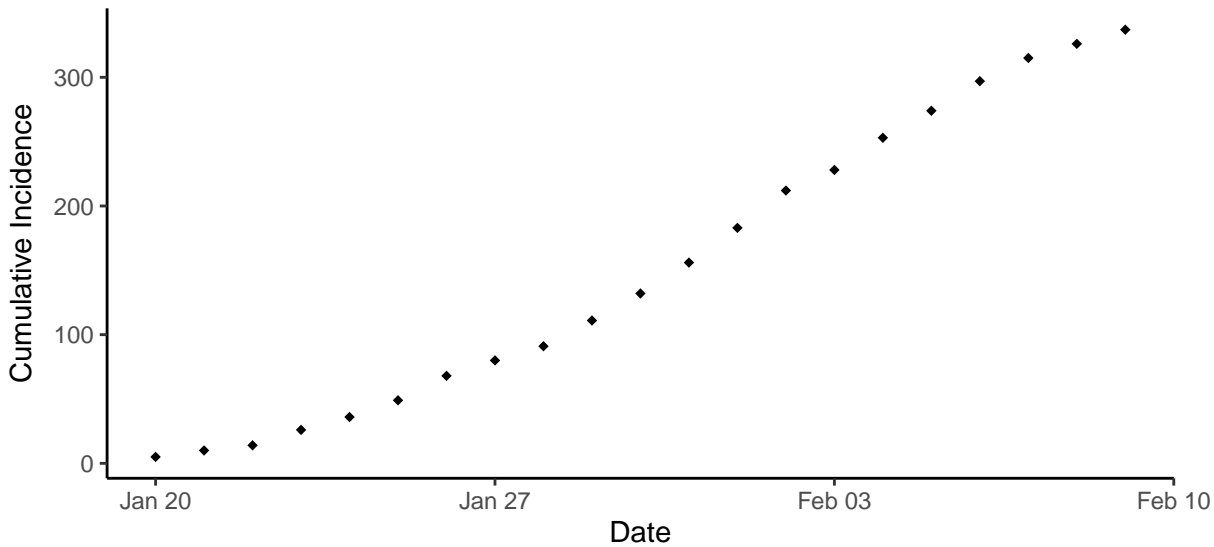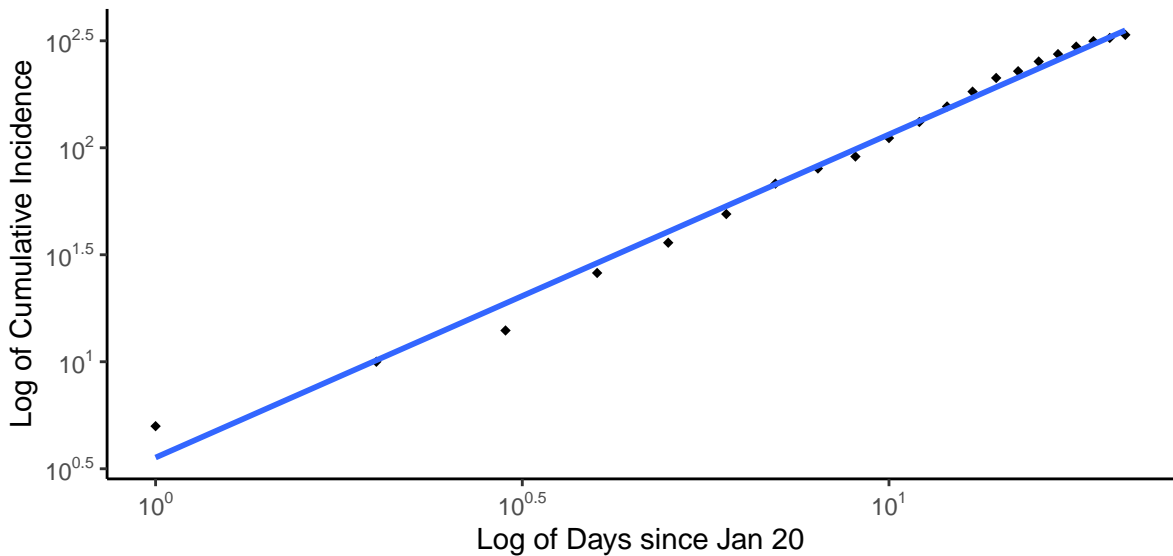

# Chongqing

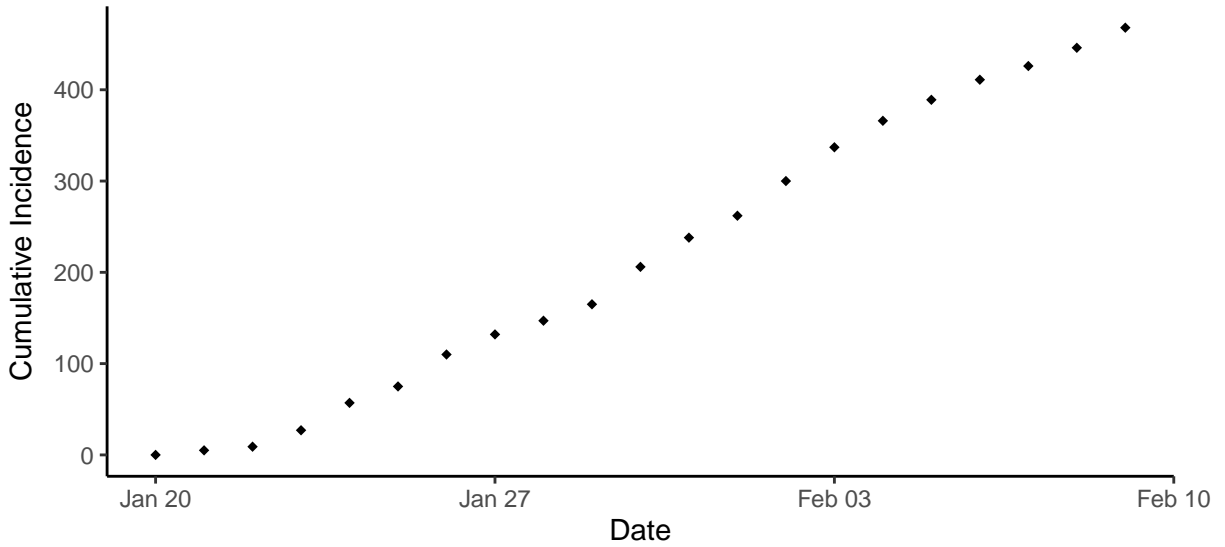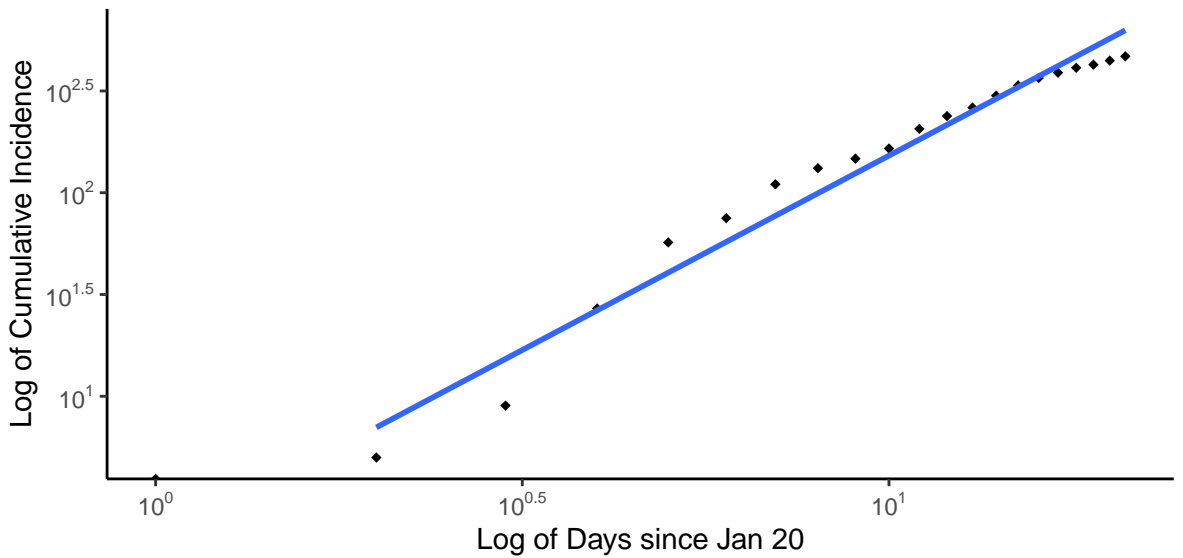



# Fujian

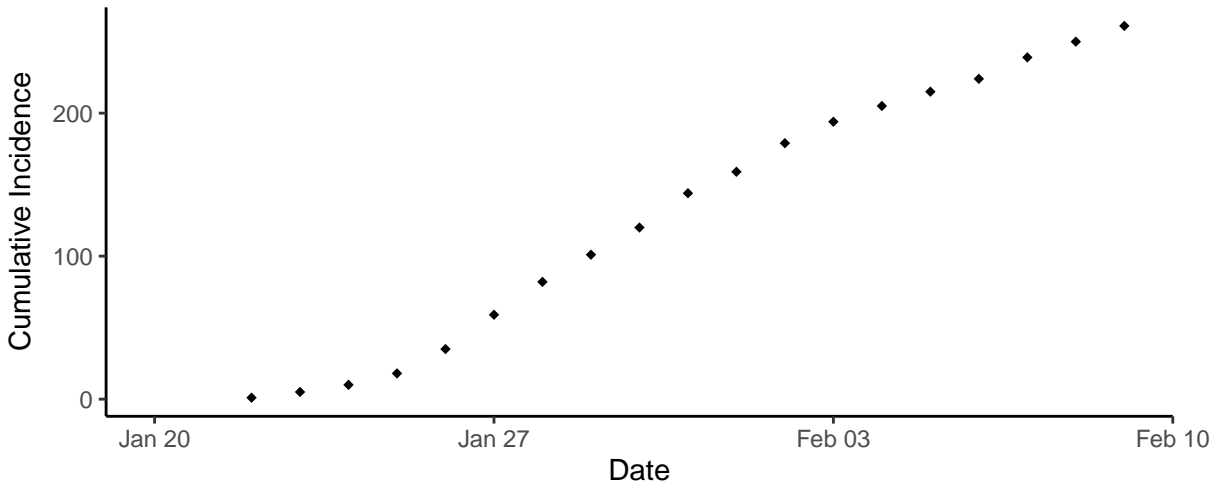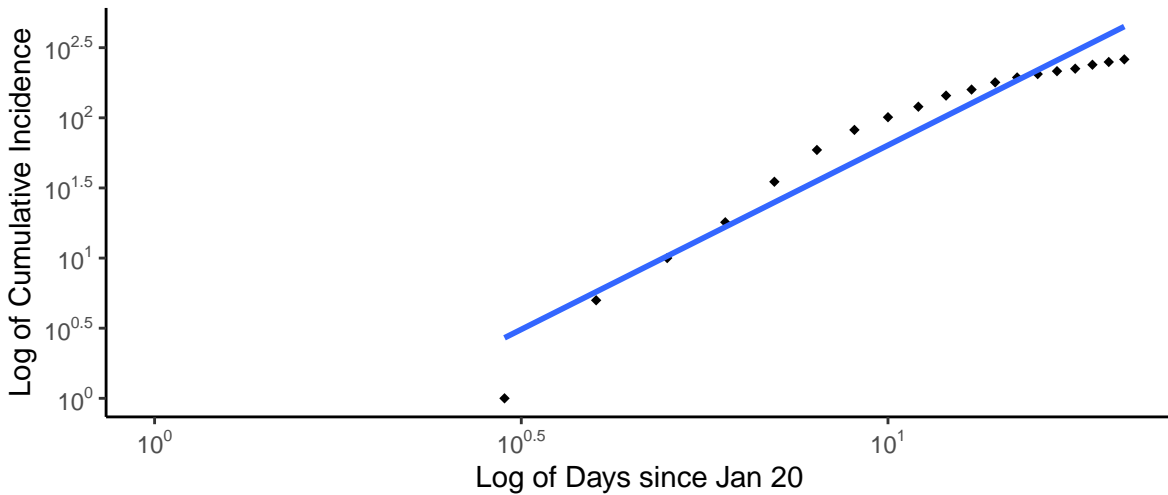

# Gansu

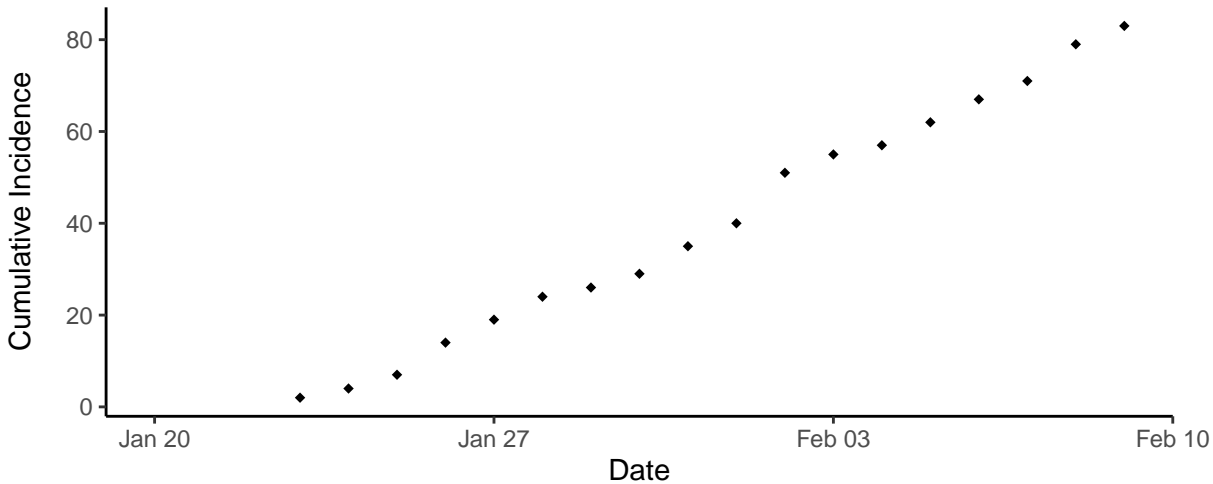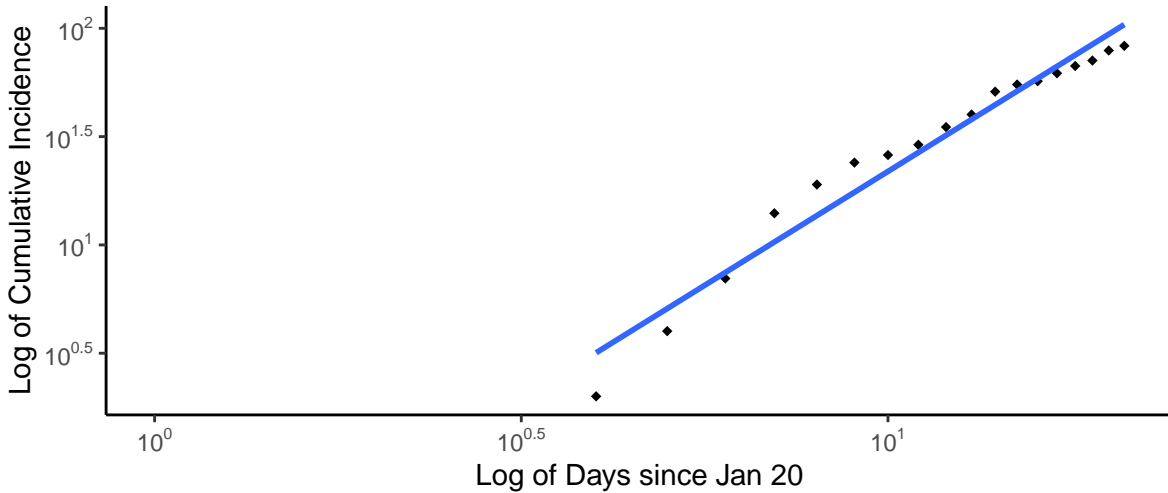

# Guangdong

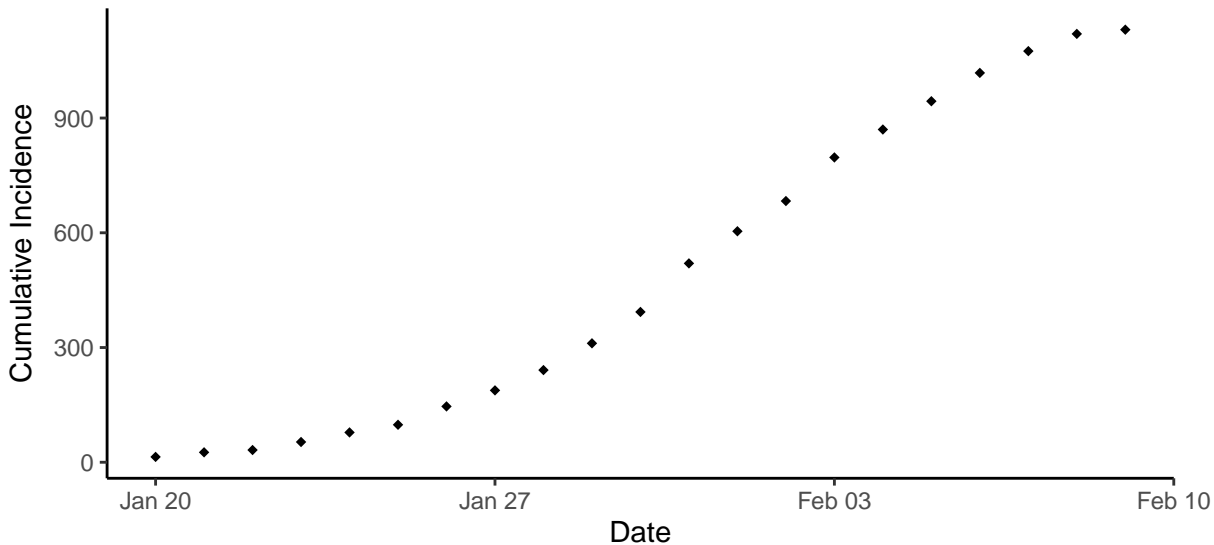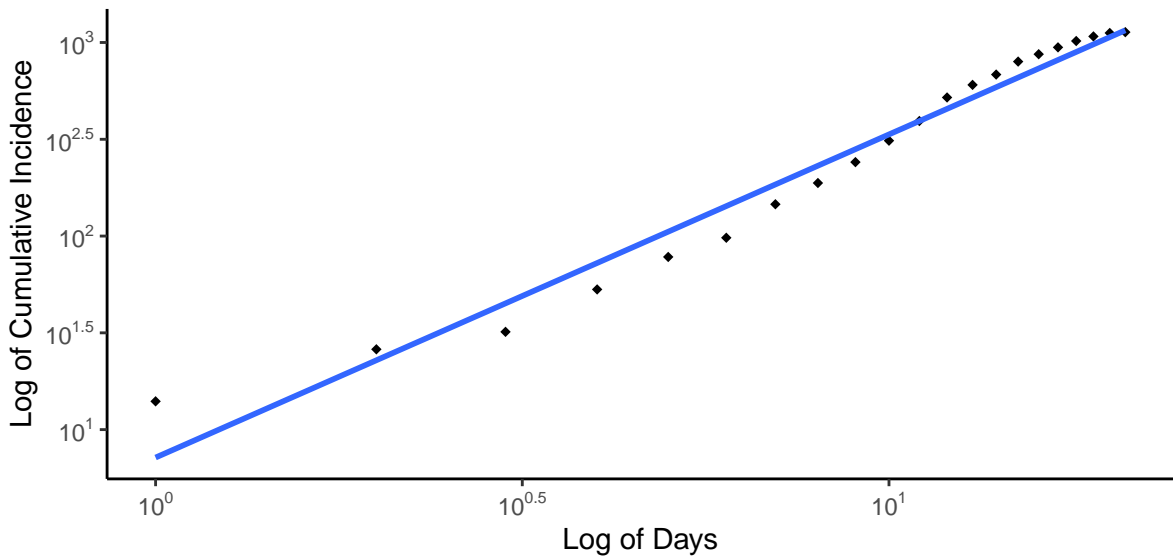

# Guangxi

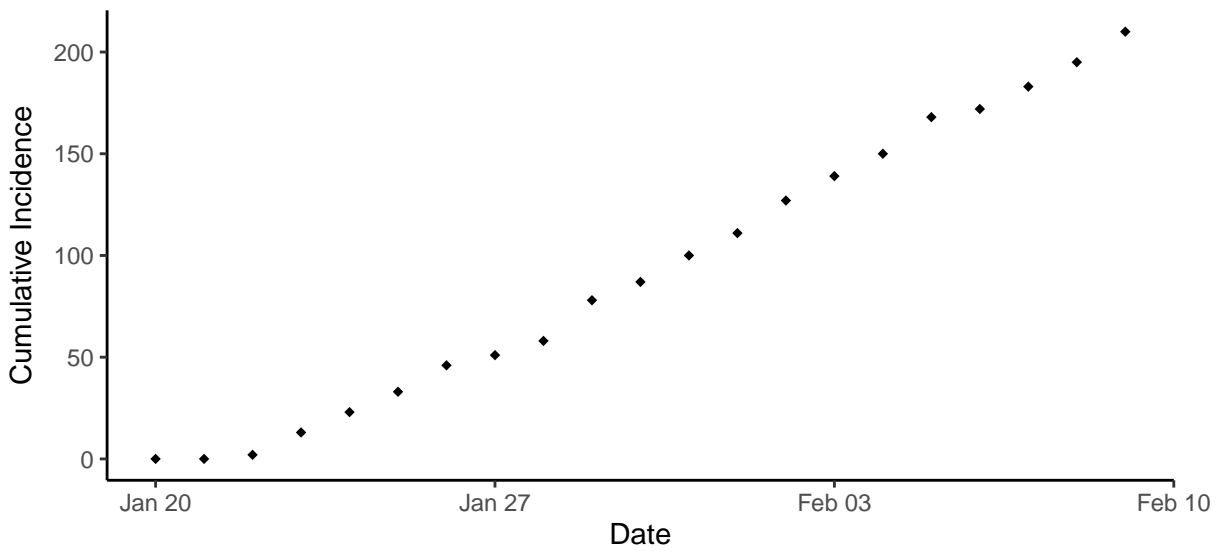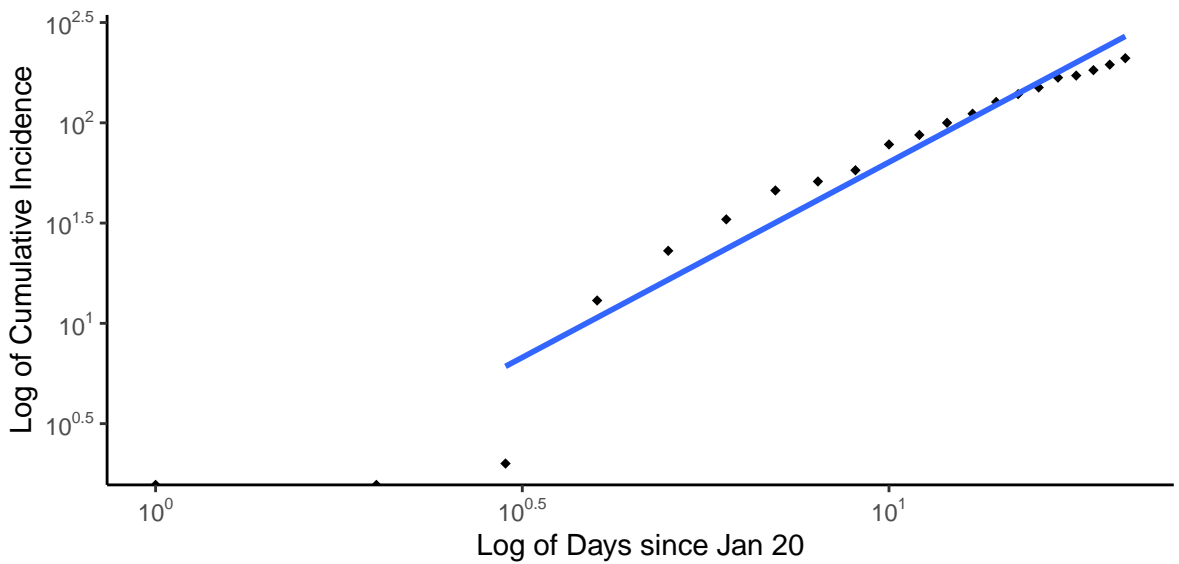

# Guizhou

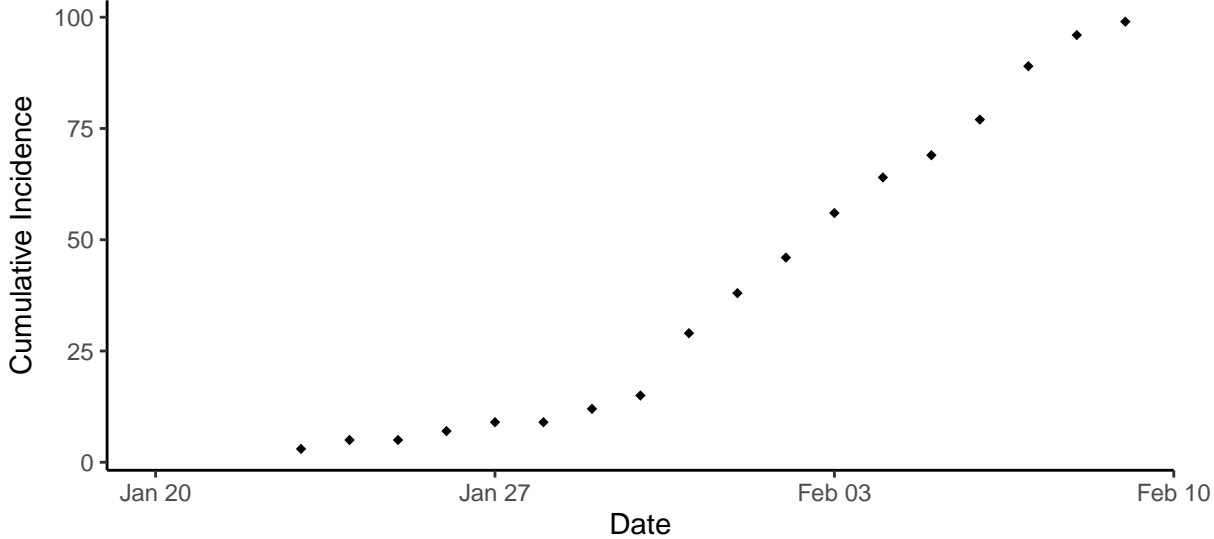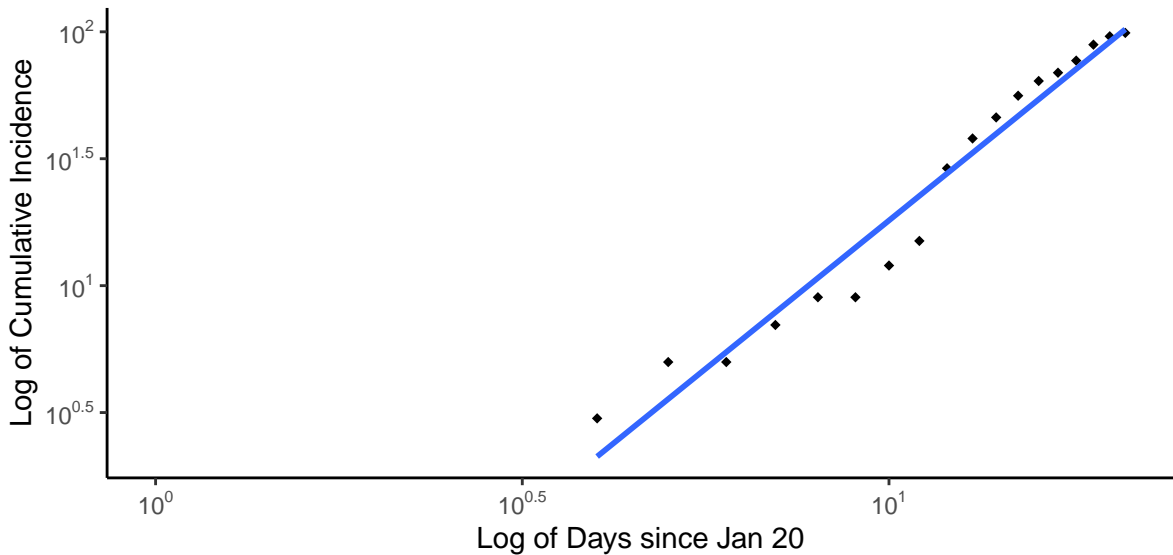

# Hainan

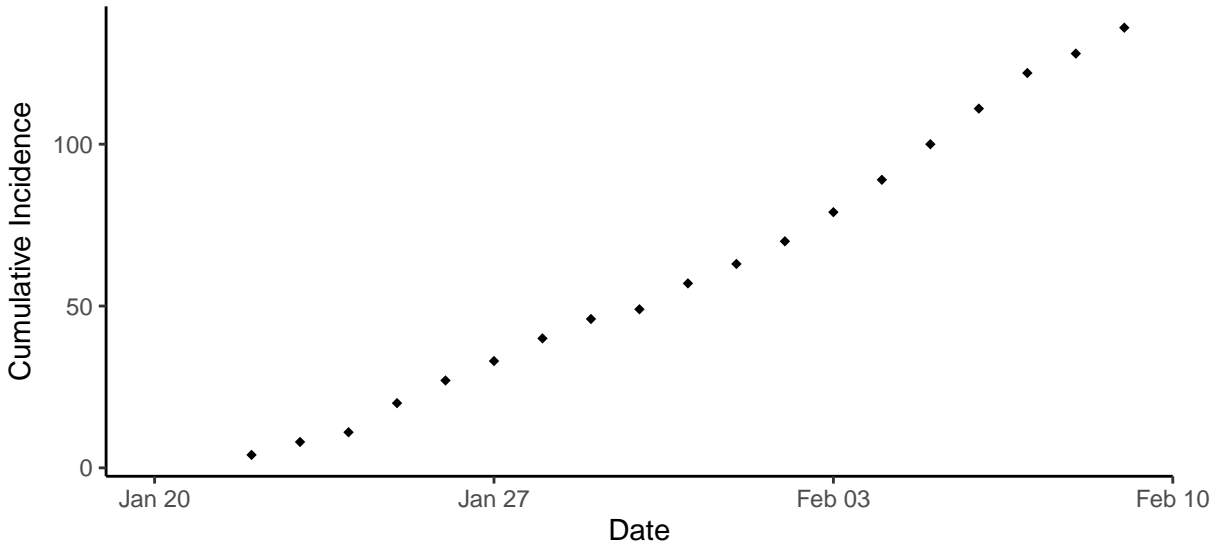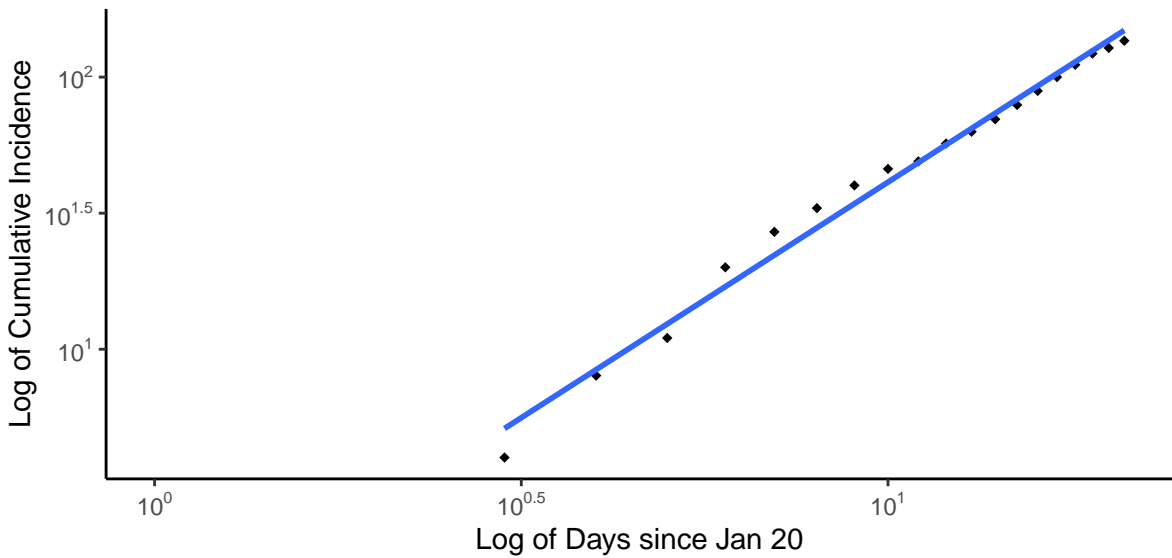

# Hebei

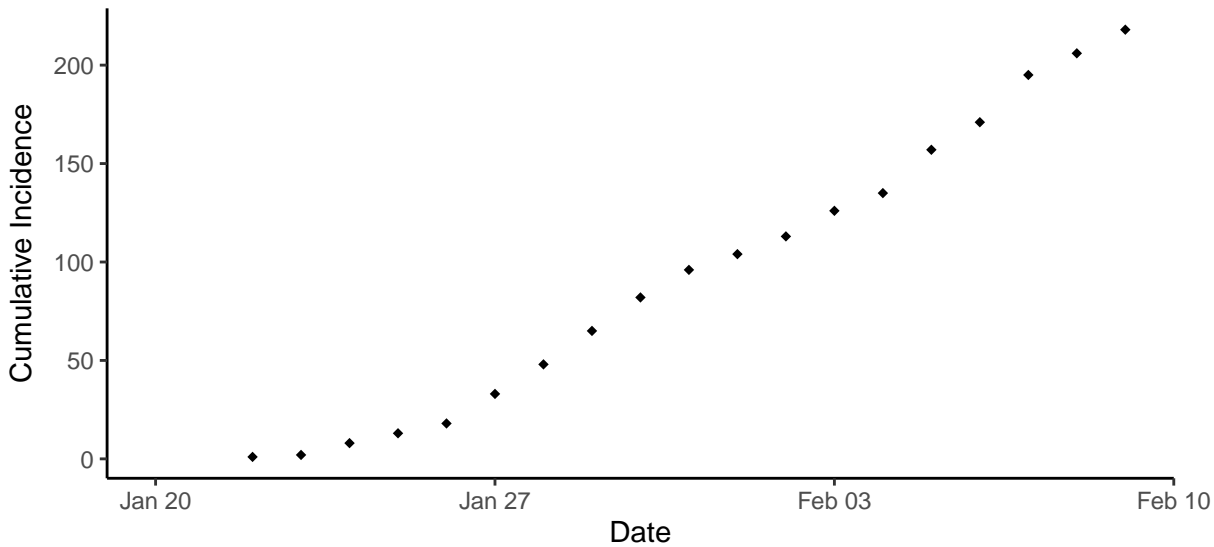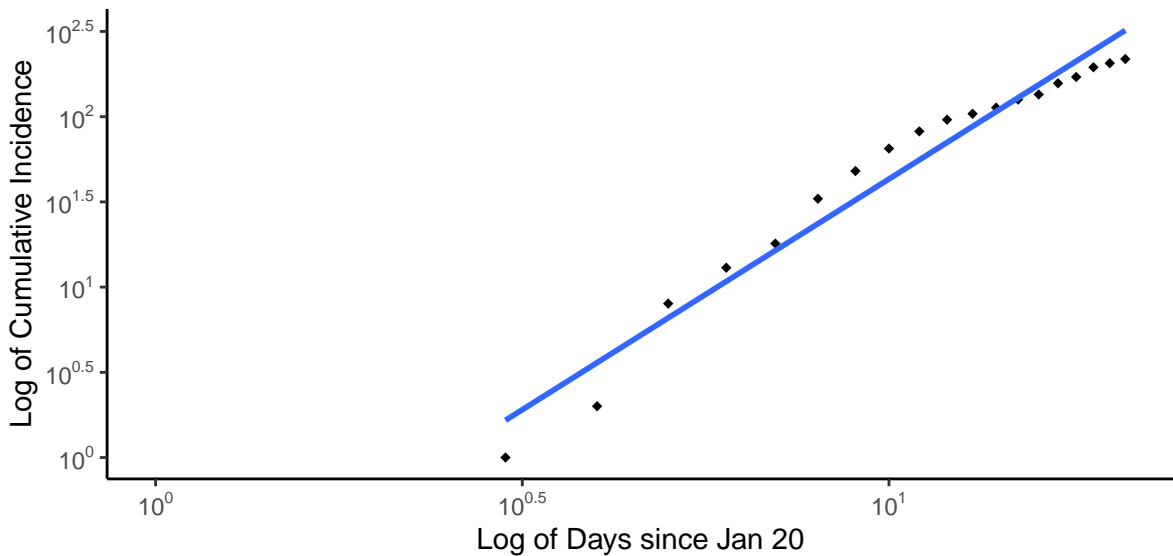

# Heilongjiang

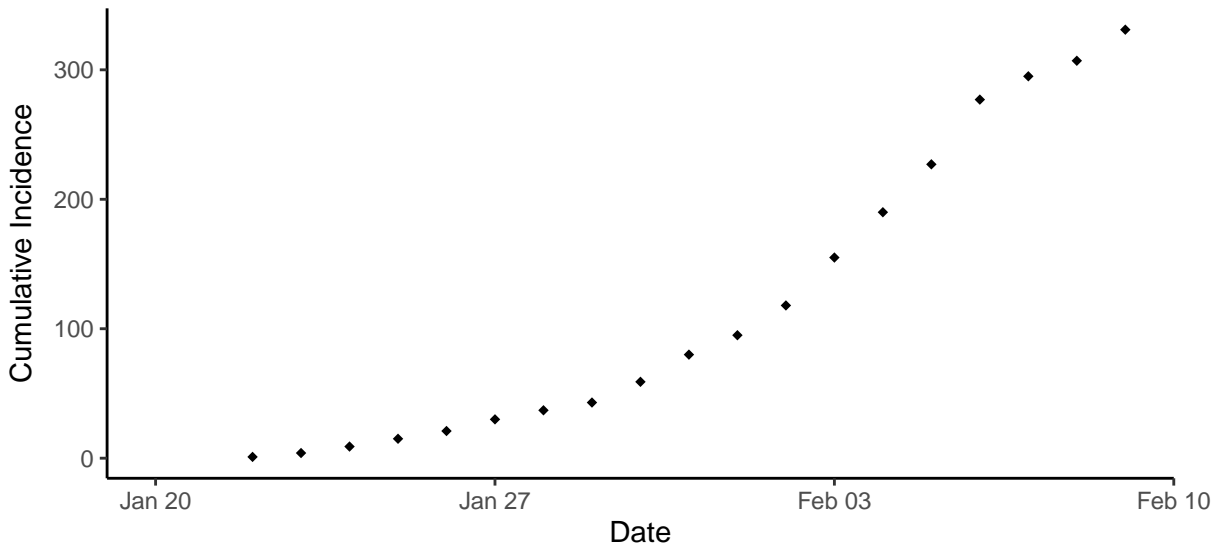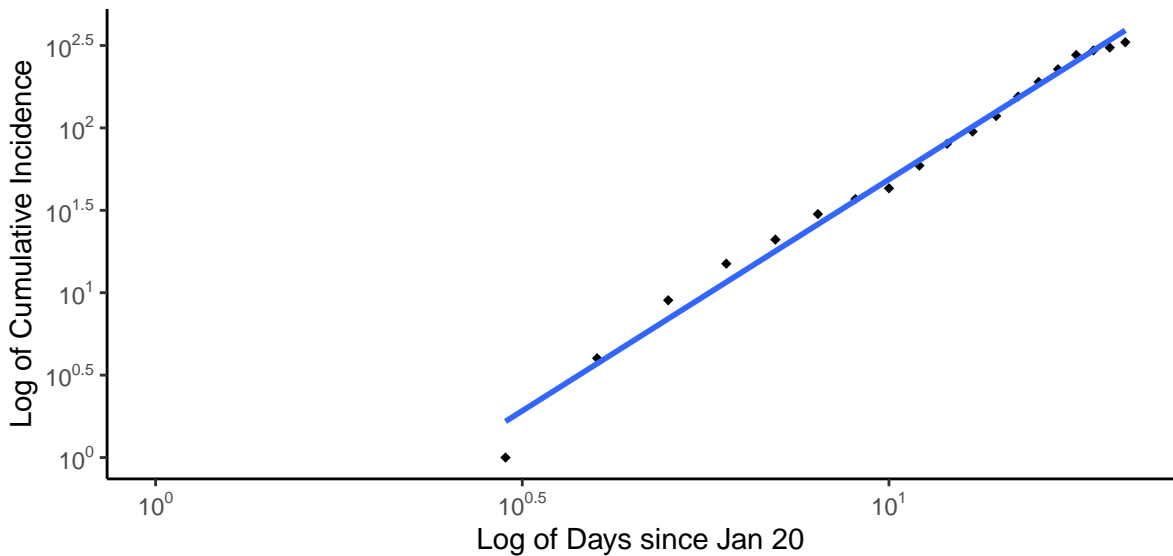



# Henan

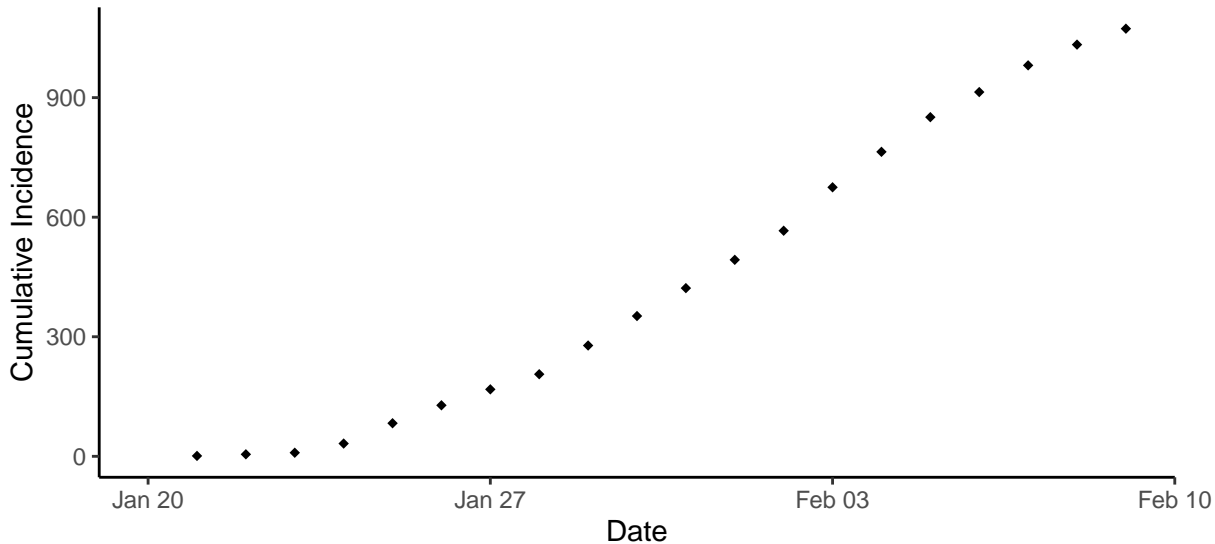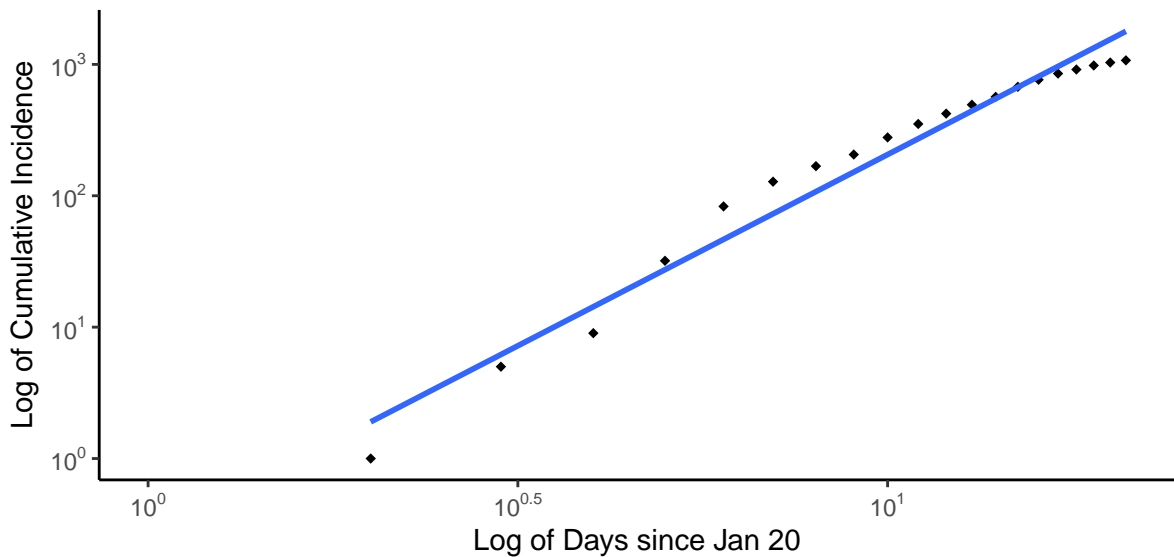

# Hunan

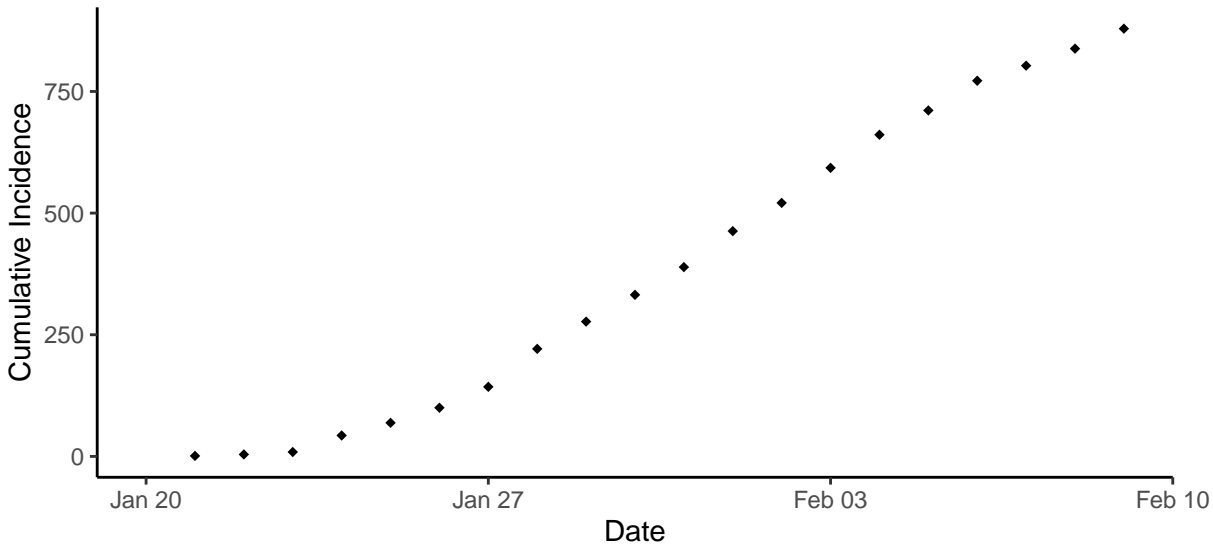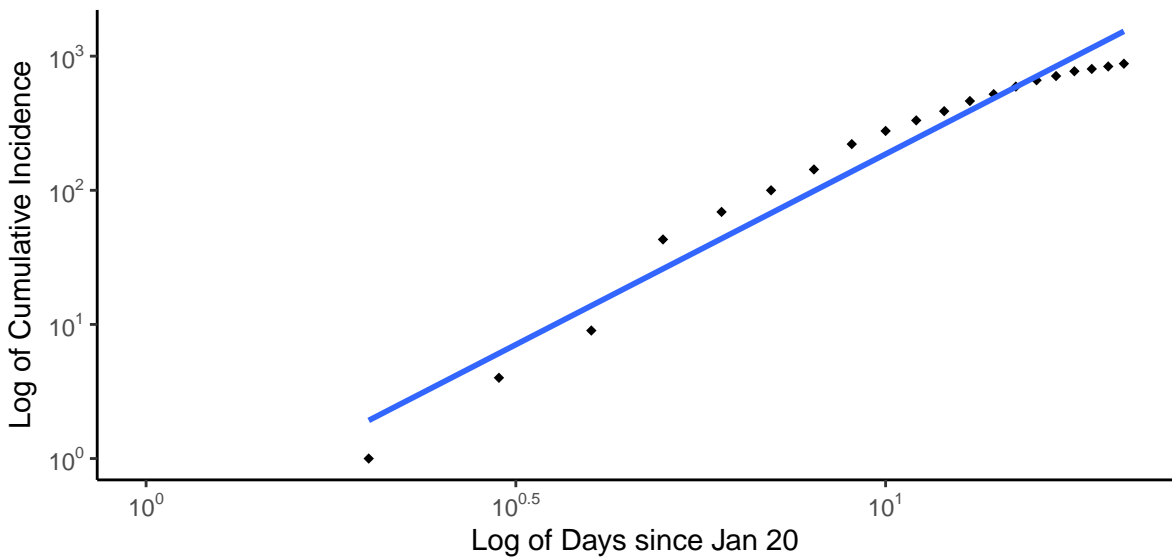

# Inner Mongolia

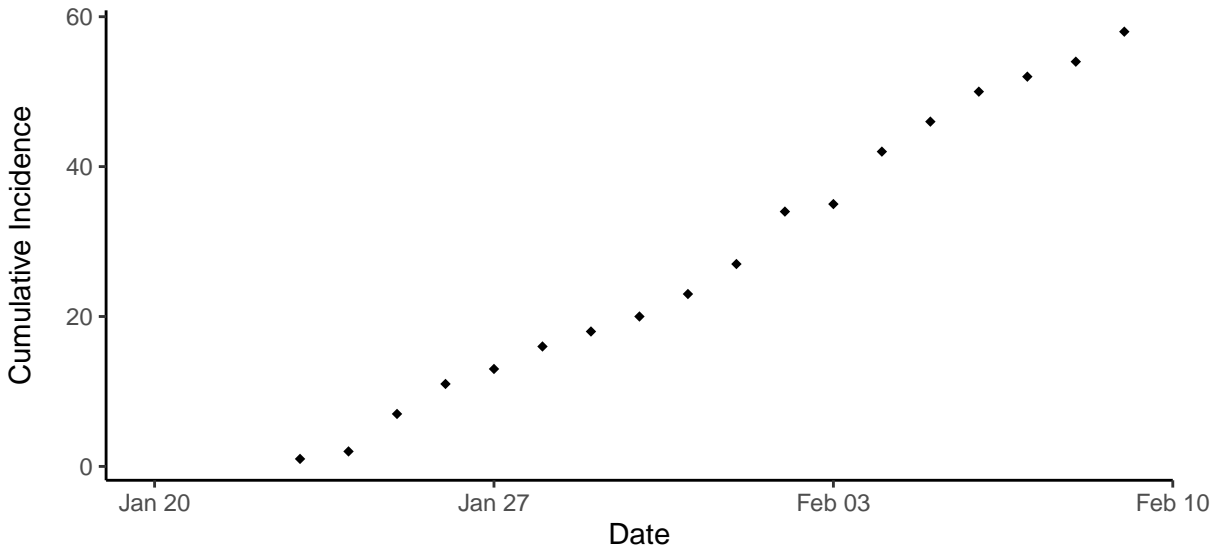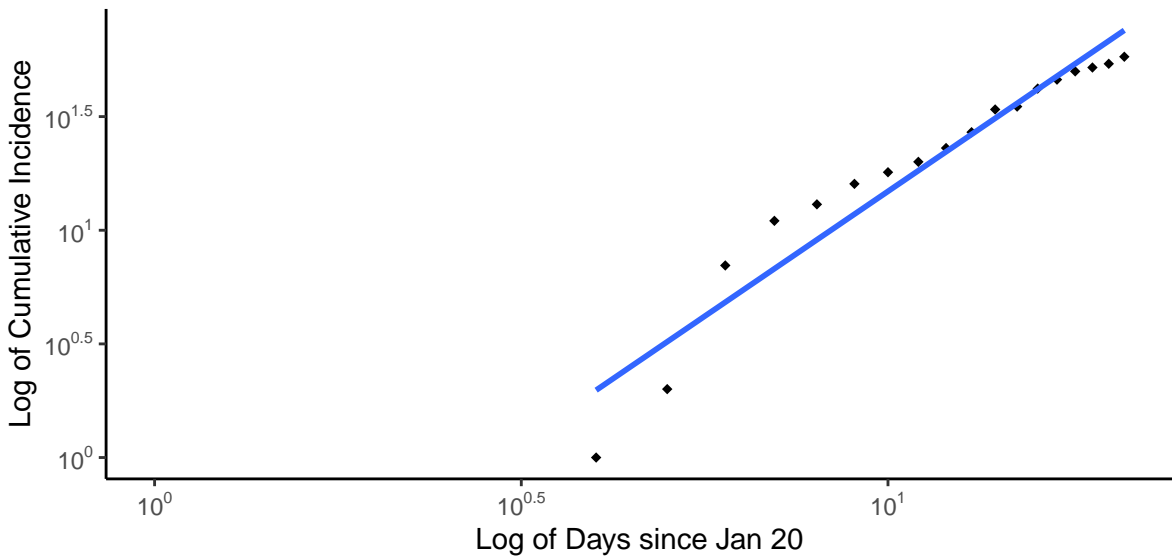

# Jiangsu

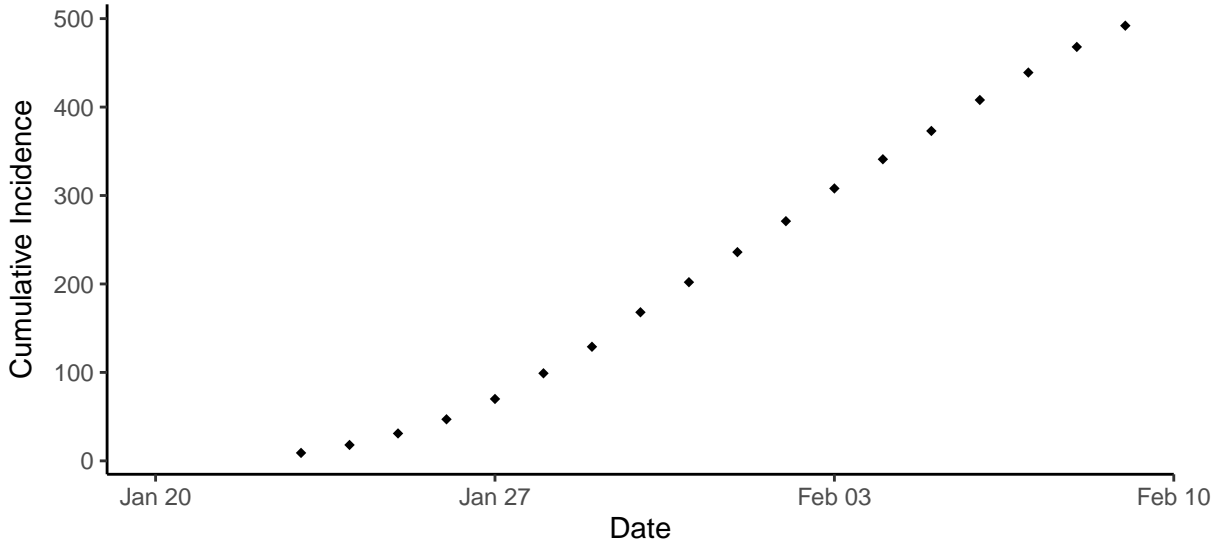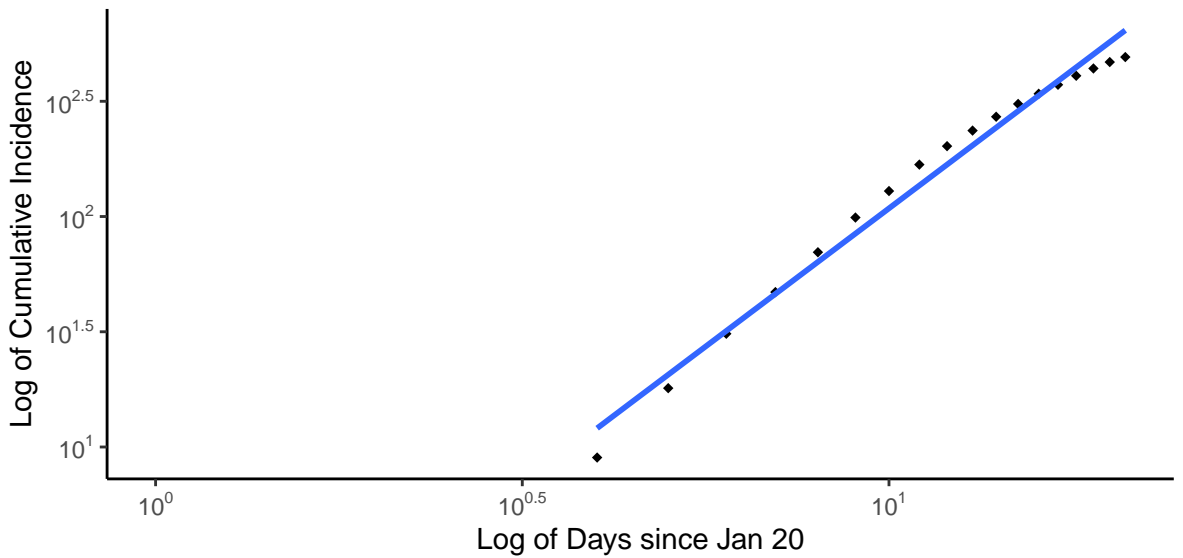

# Jiangxi

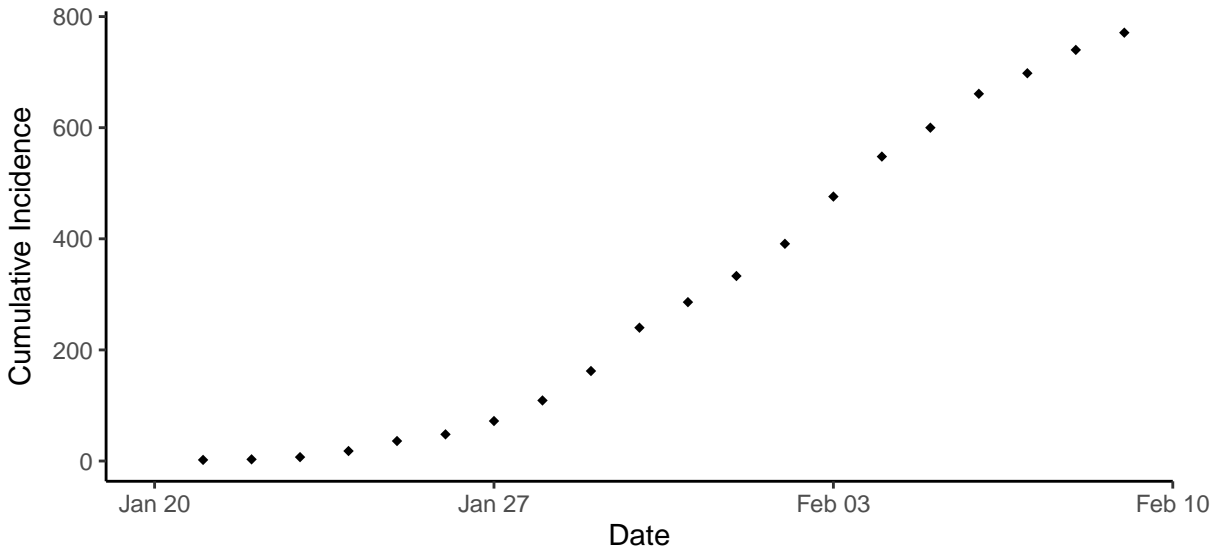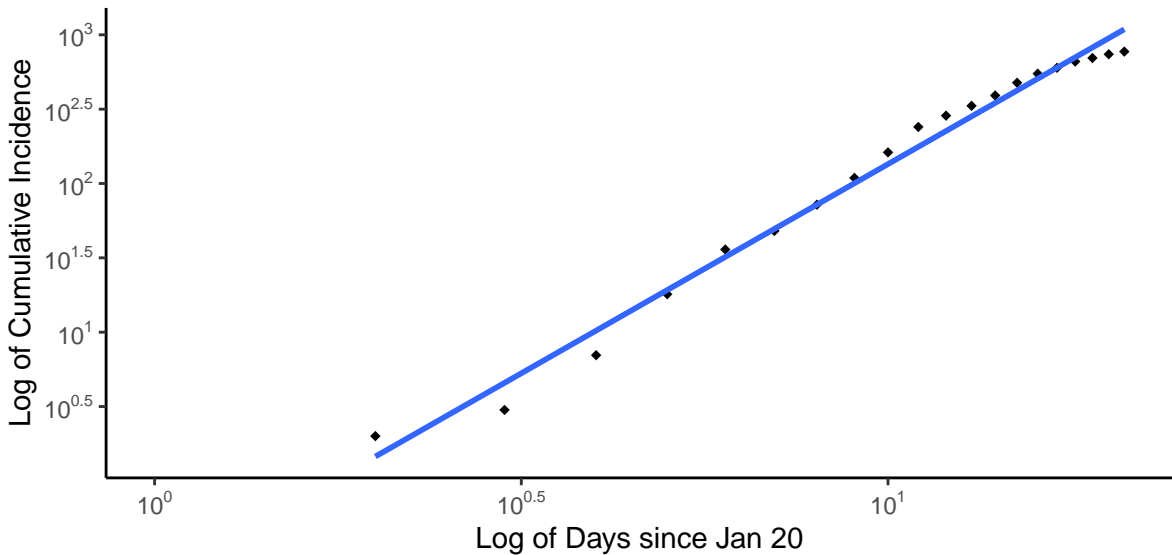

# Jilin

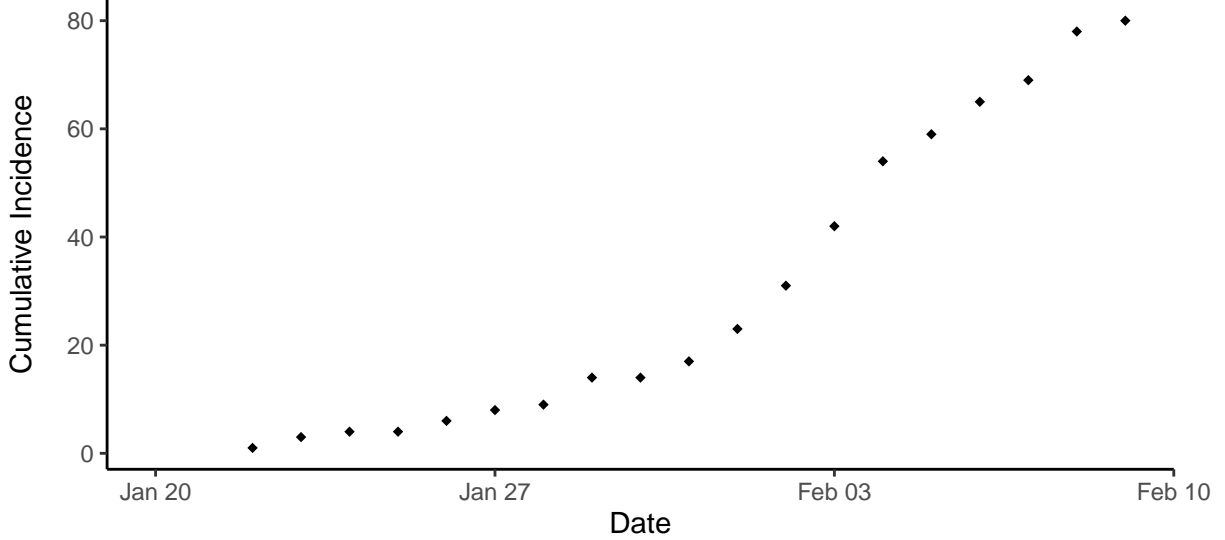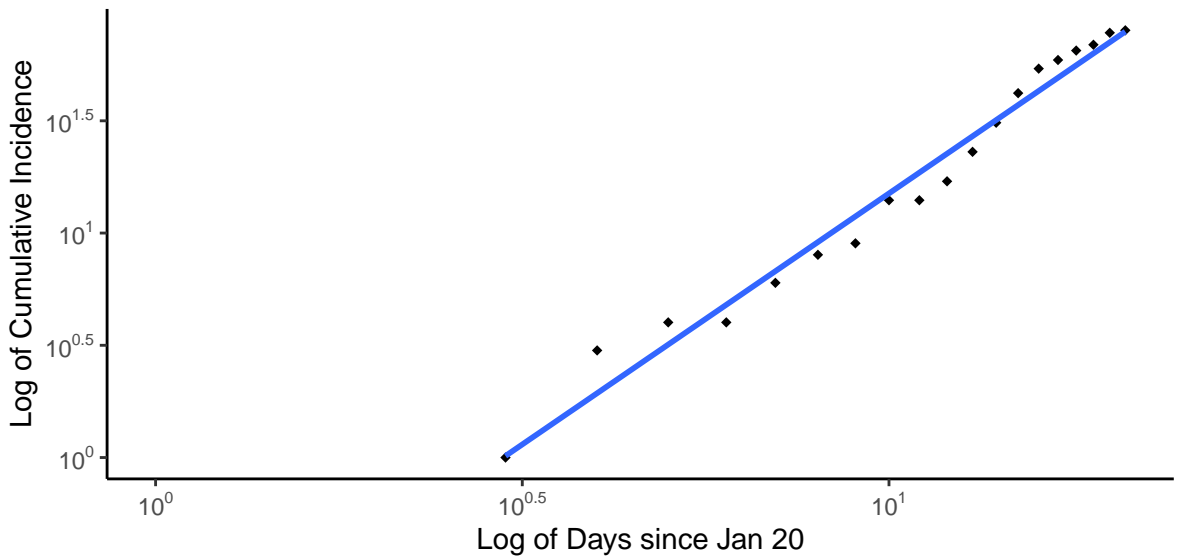

# Liaoning

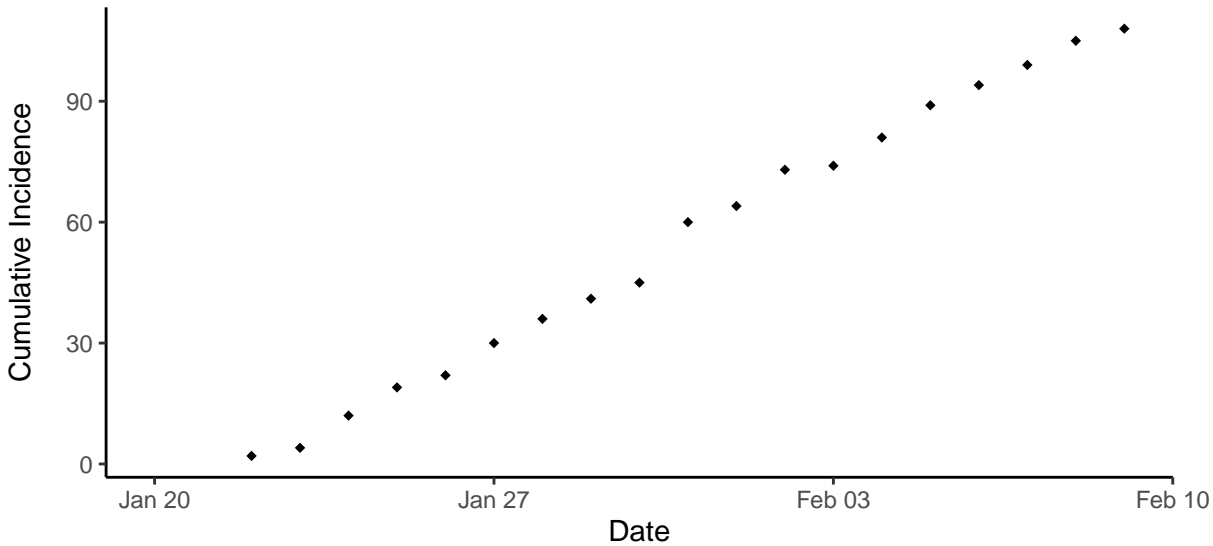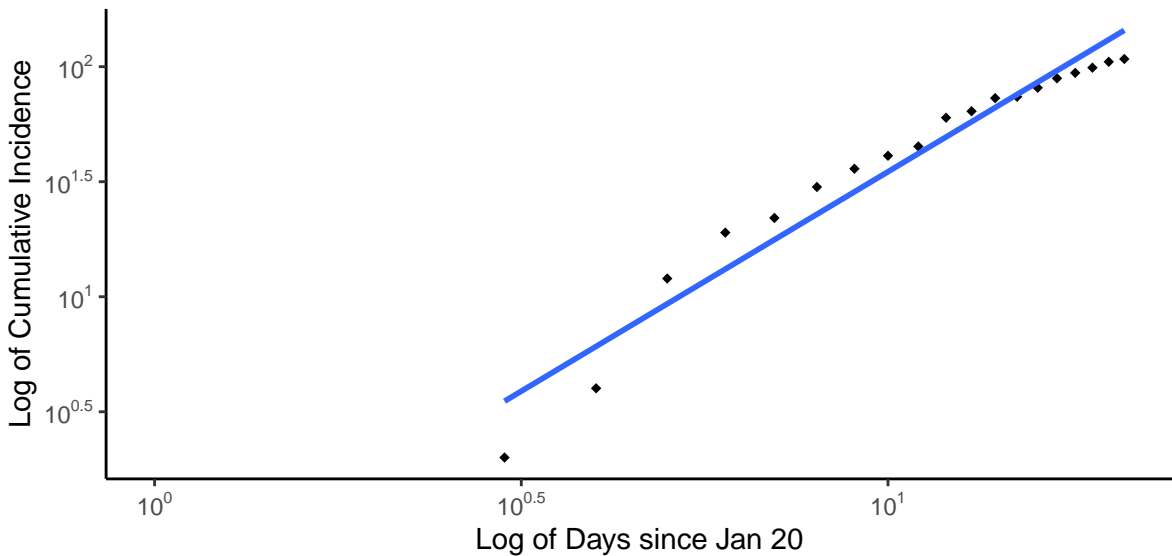

# Ningxia

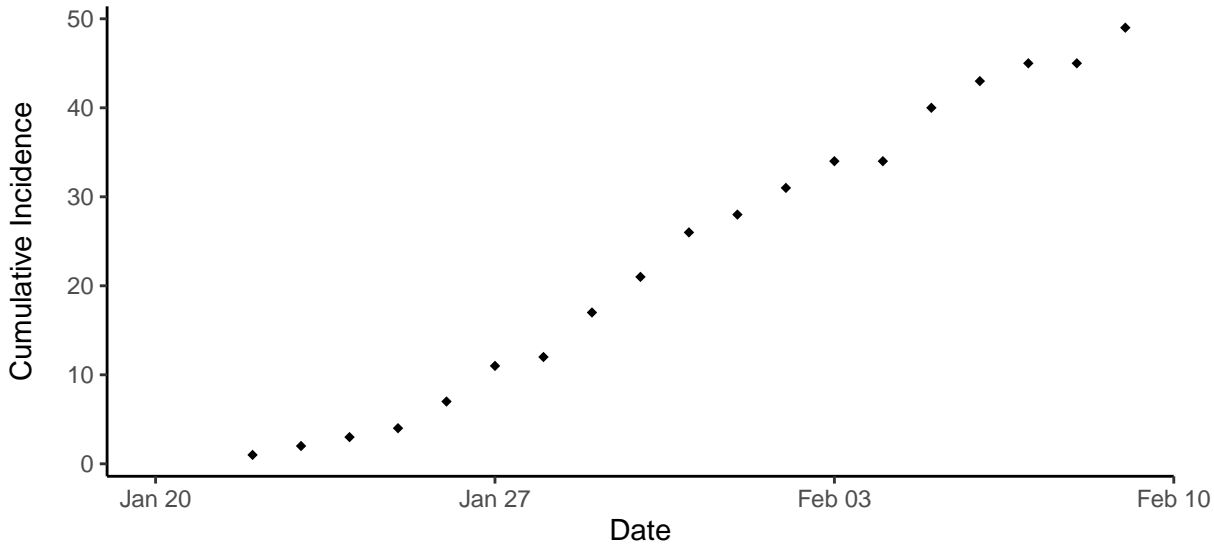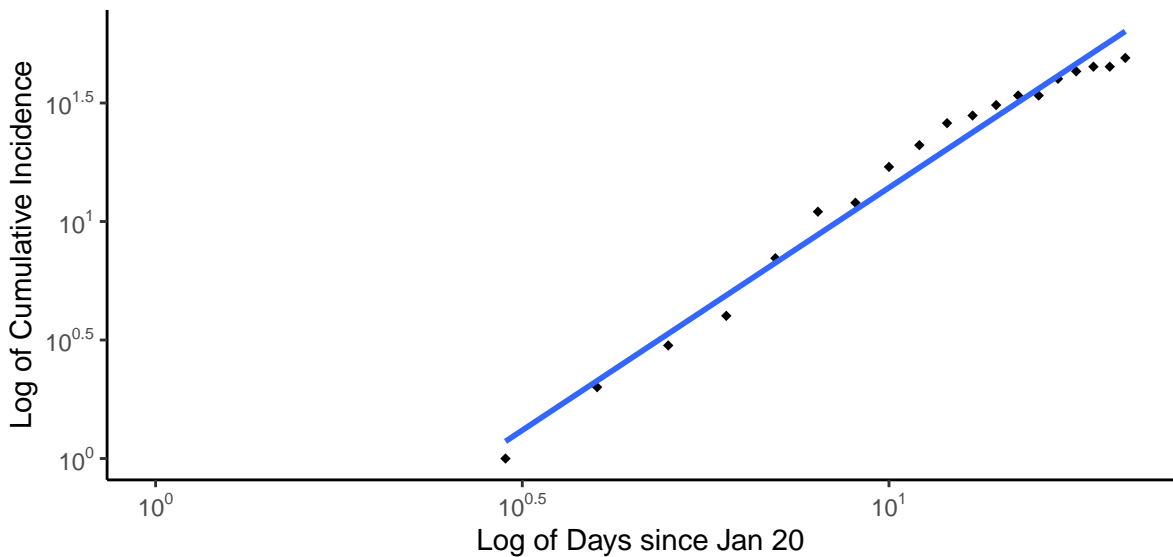



# Qinghai

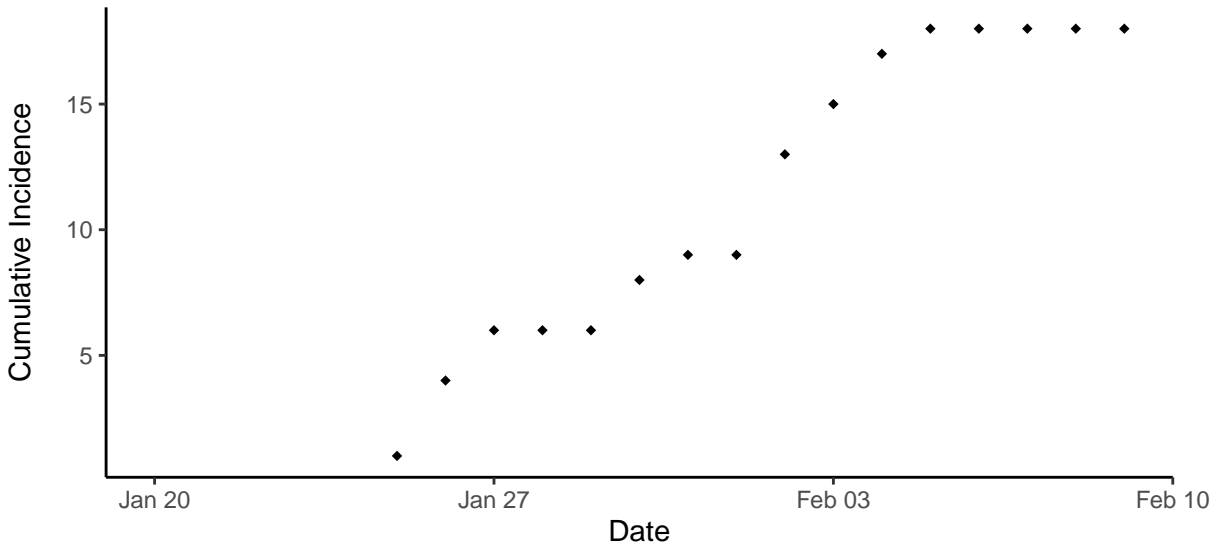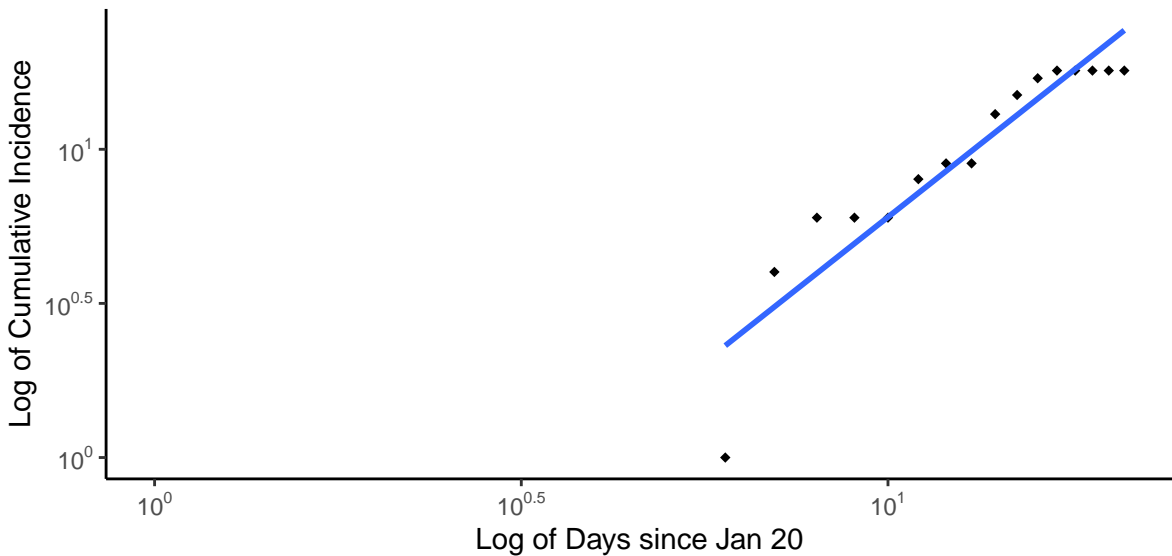

# Shaanxi

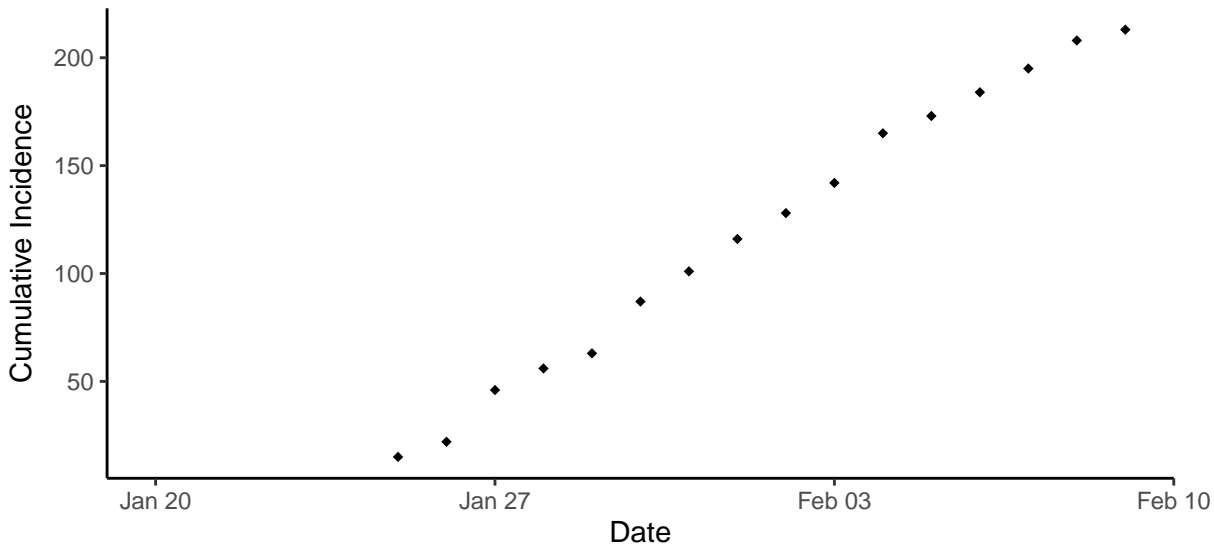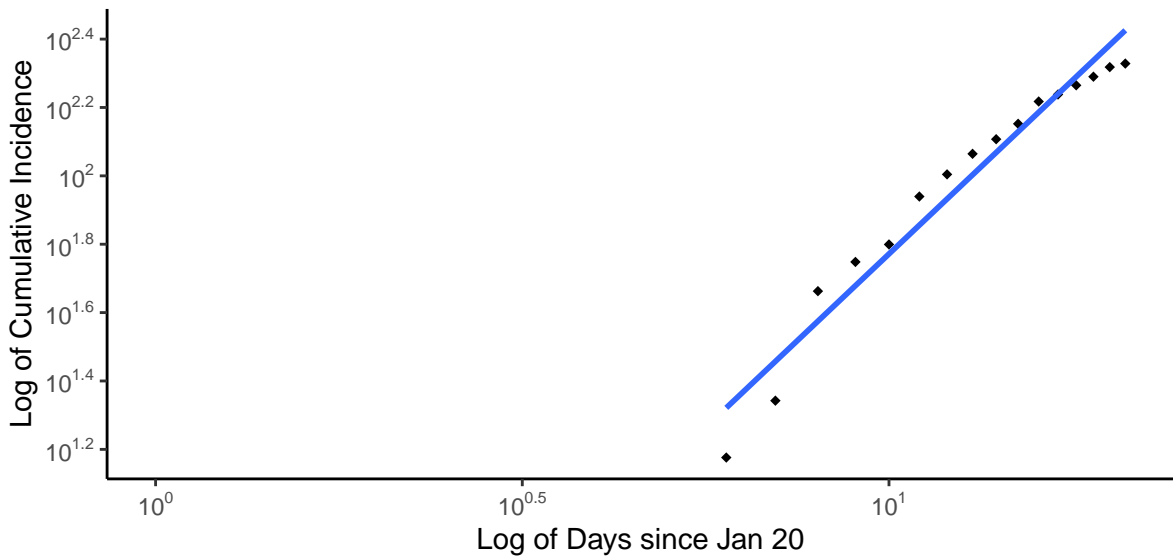

# Shandong

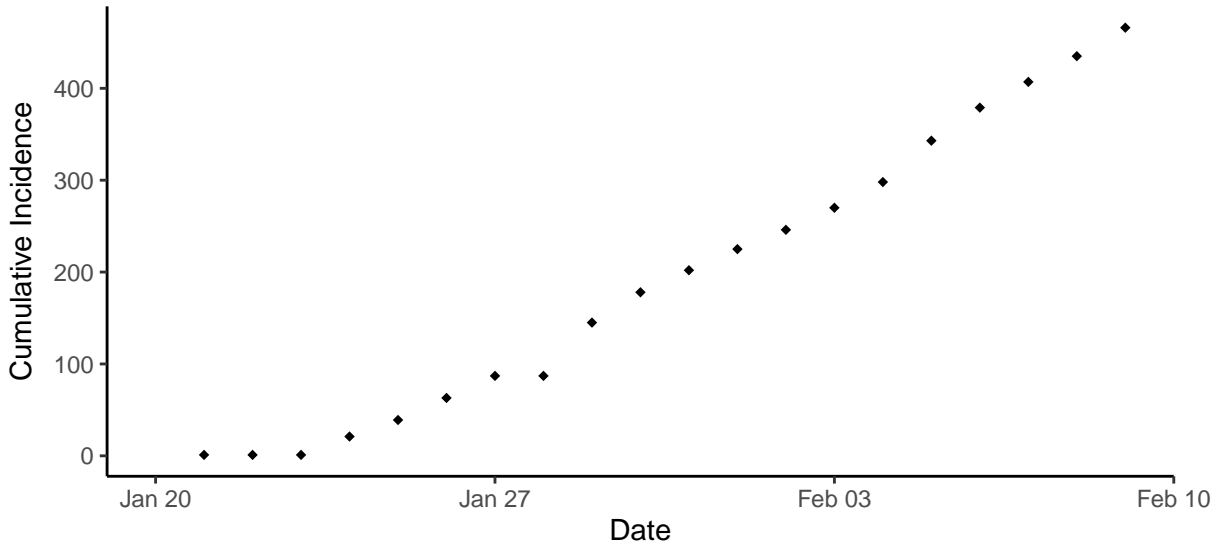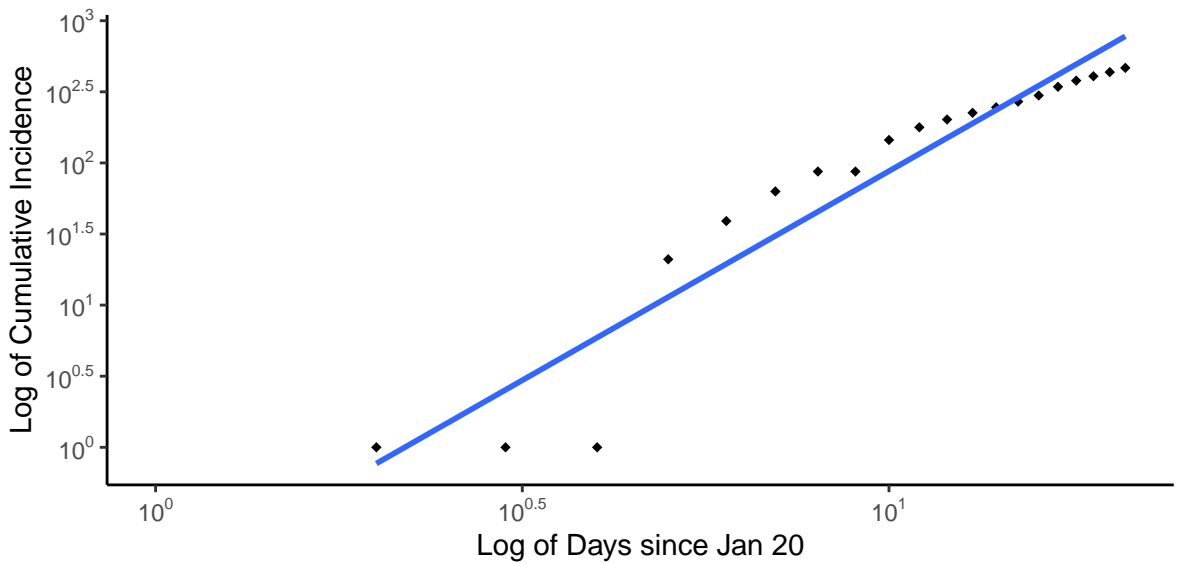

# Shanghai

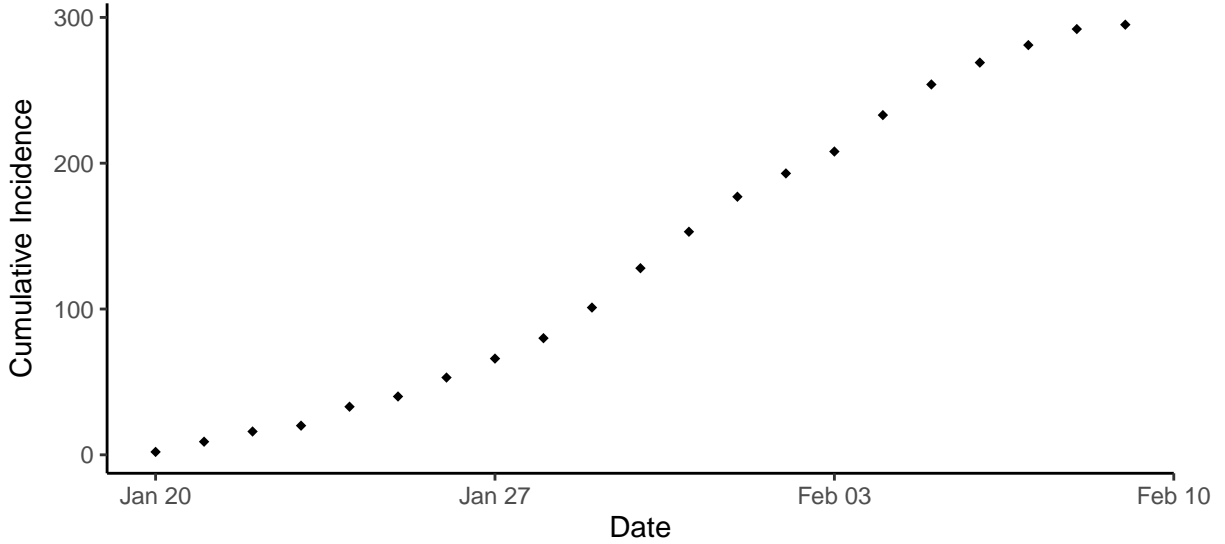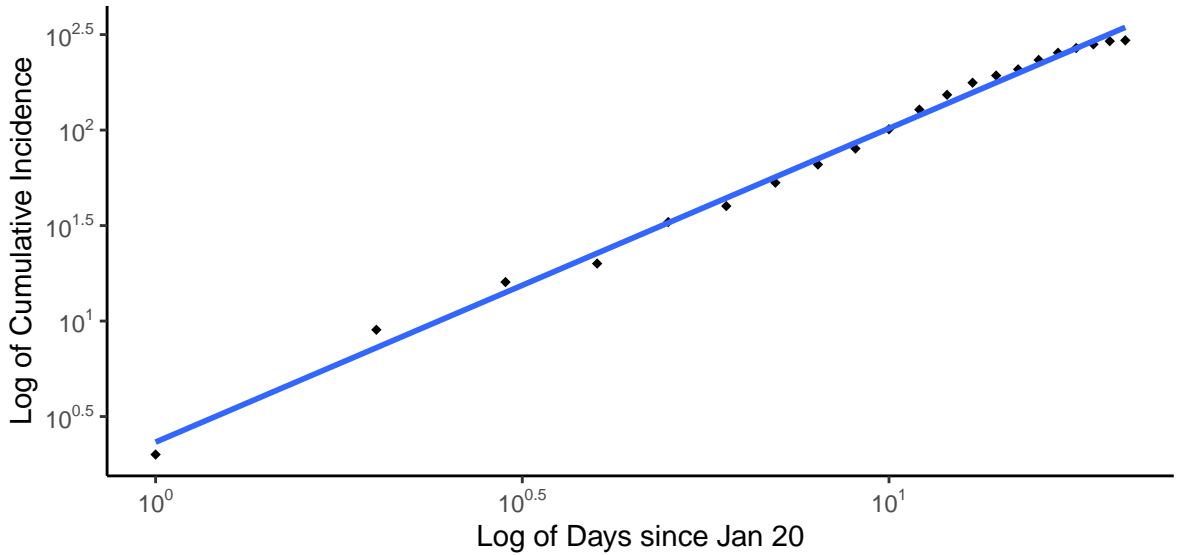

# Shanxi

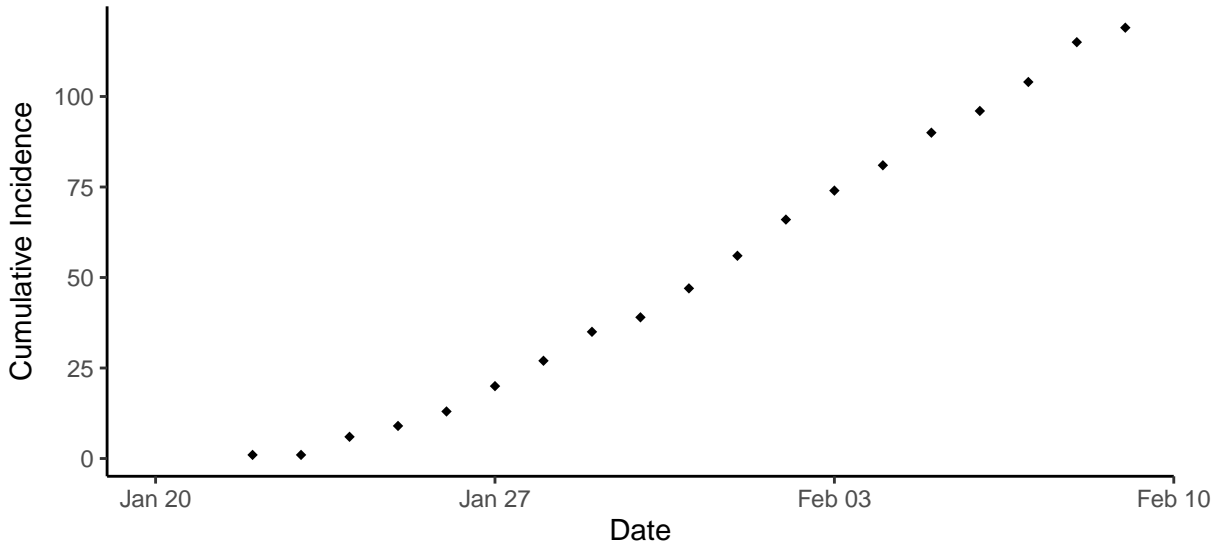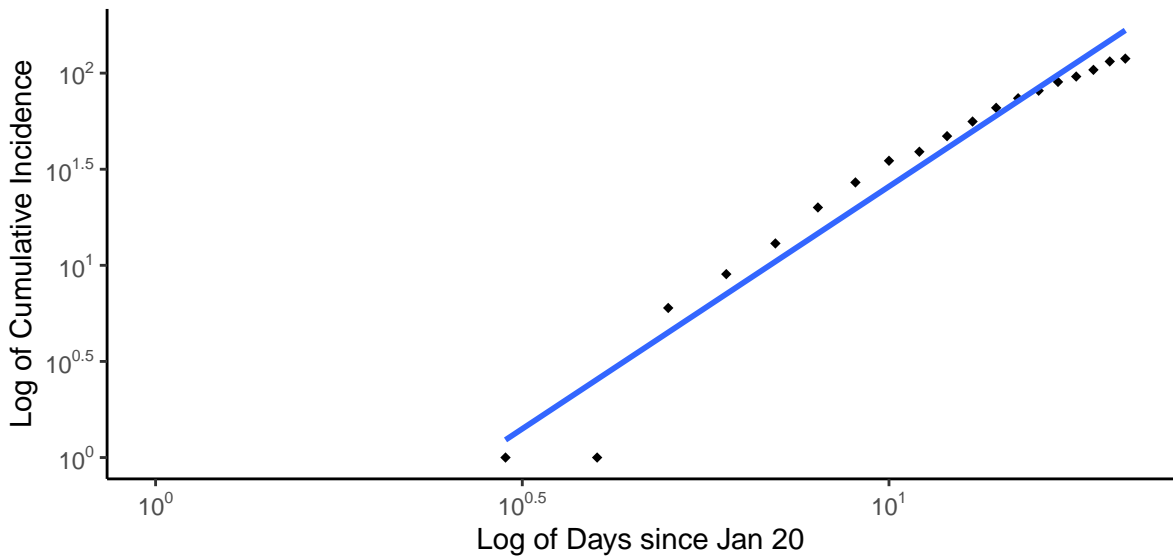

# Sichuan

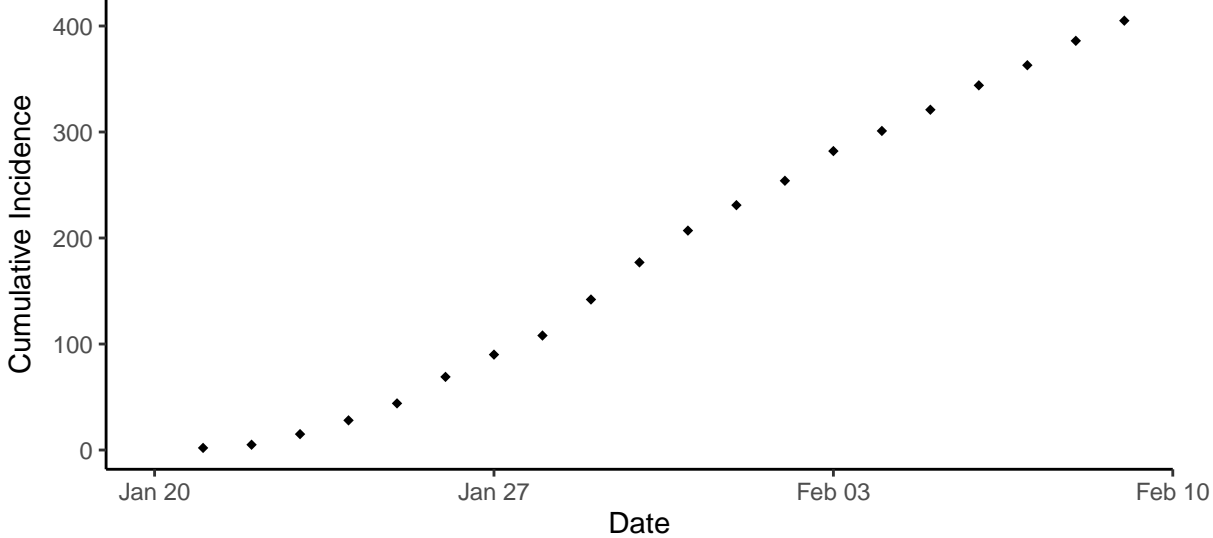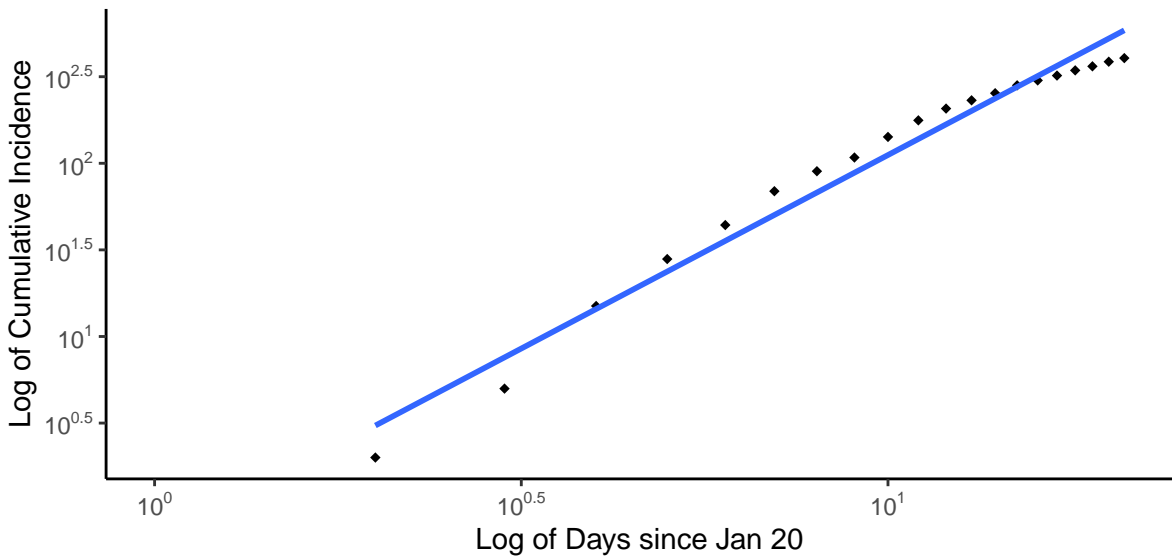

# Tianjin

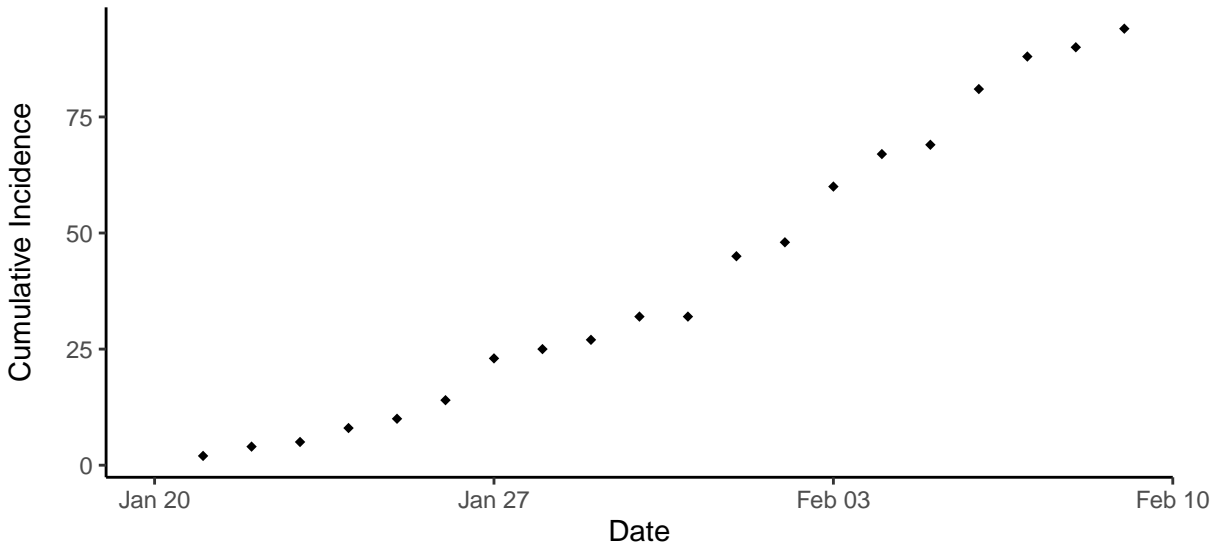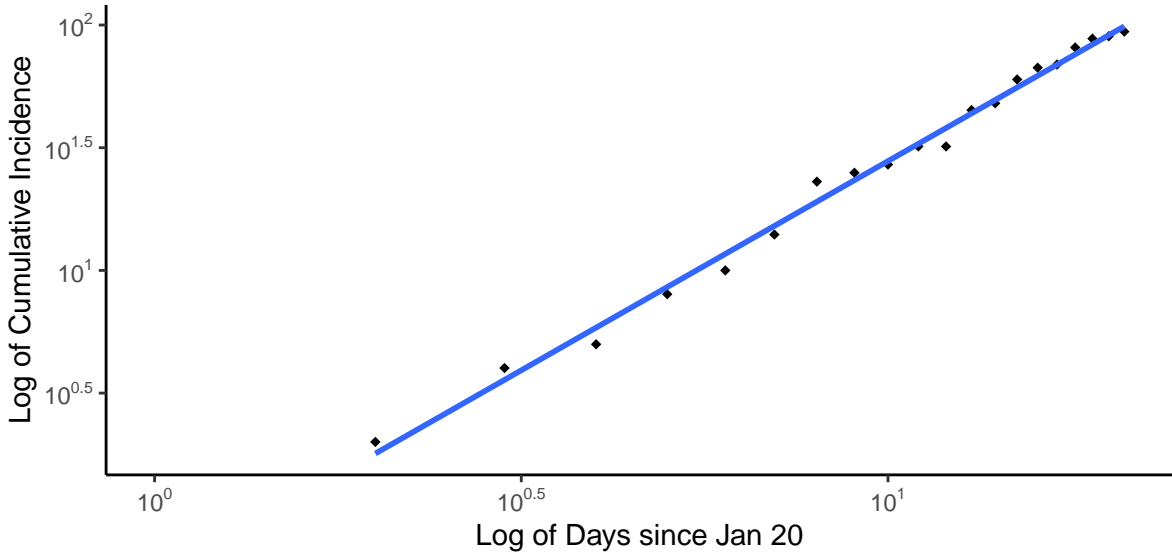

# Xinjiang

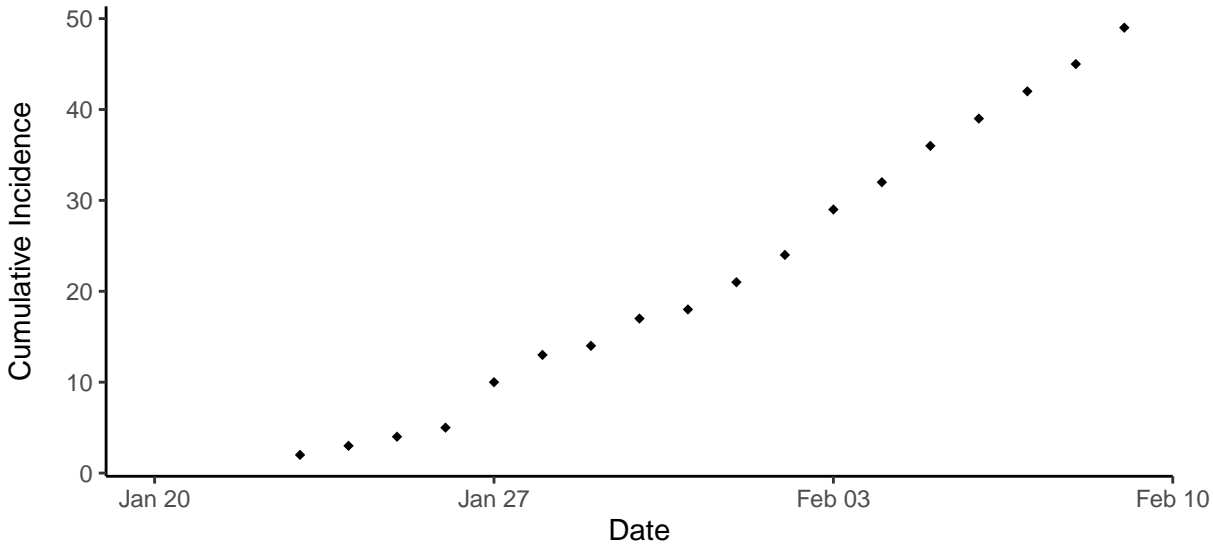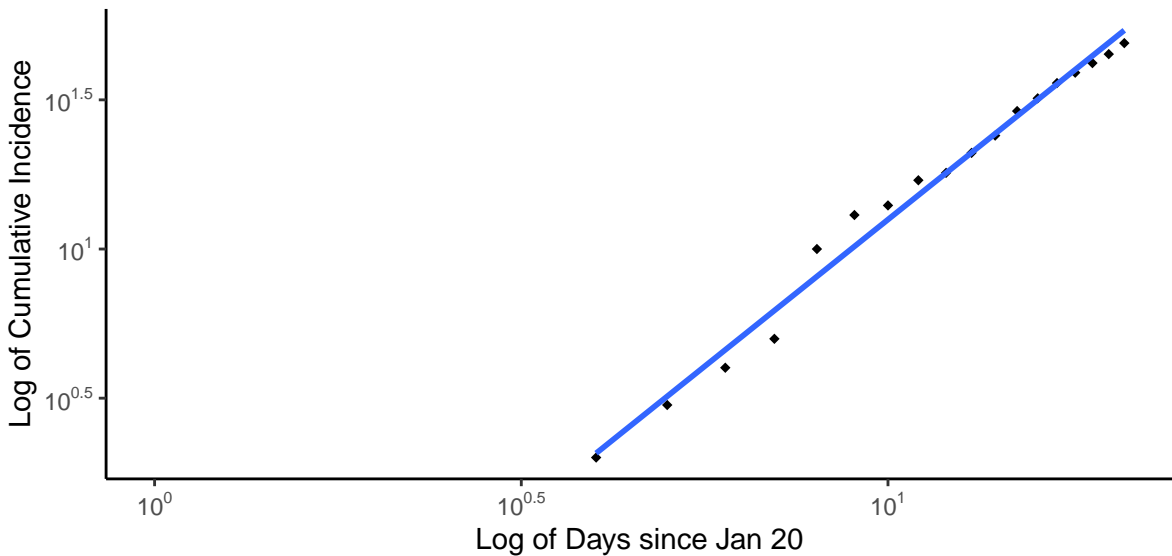



# Yunnan

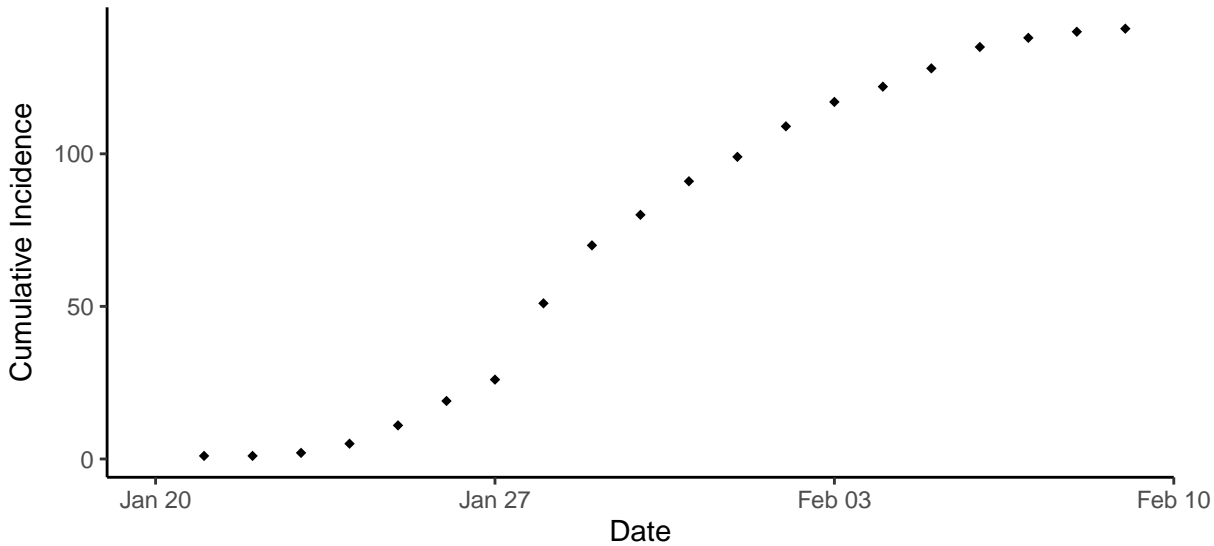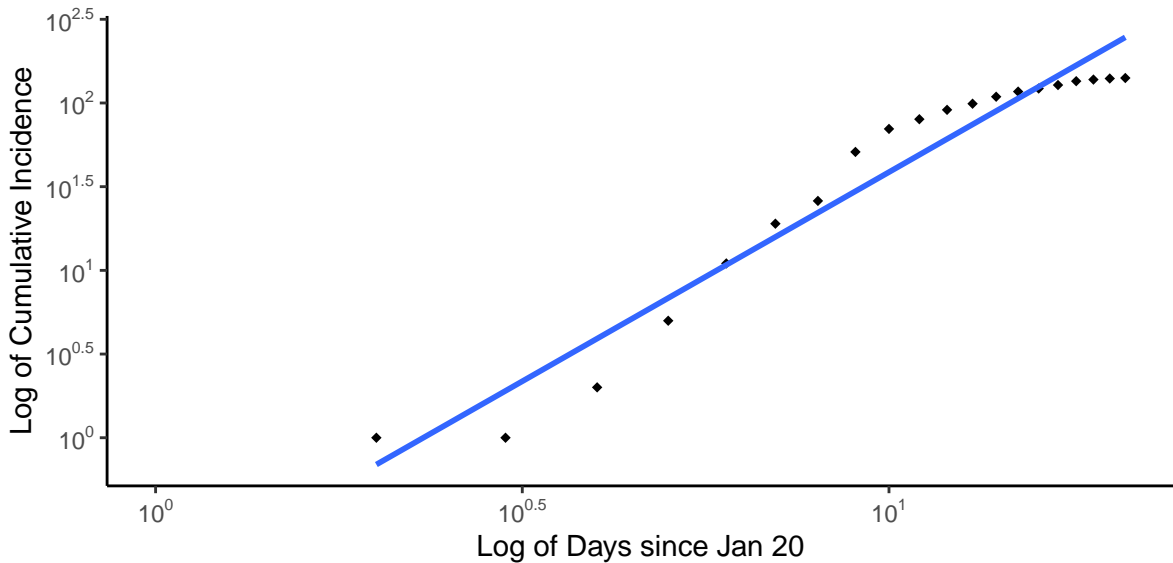

# Zhejiang

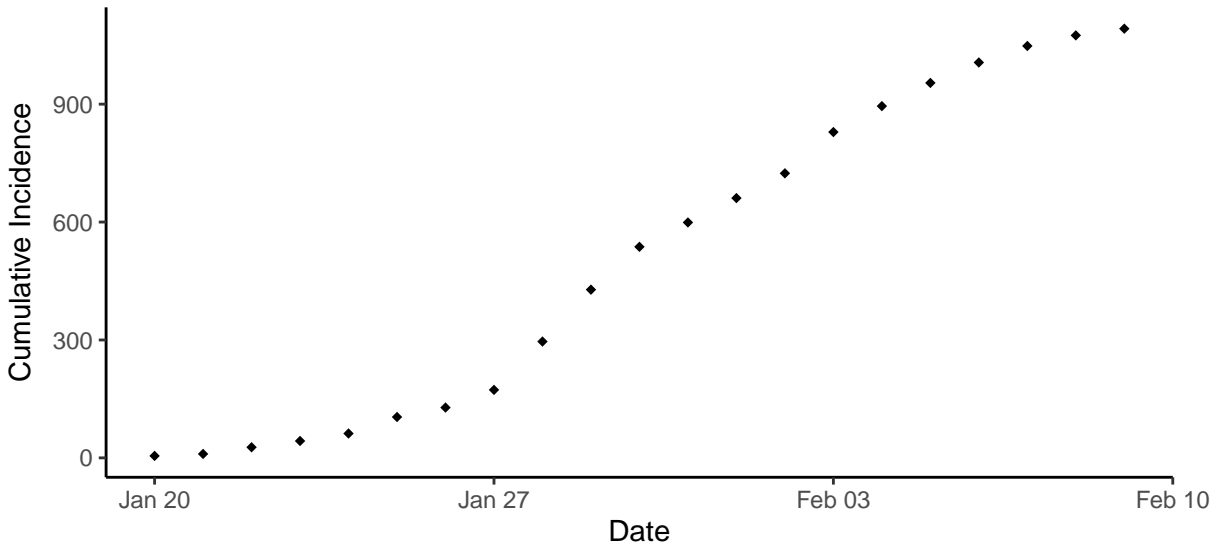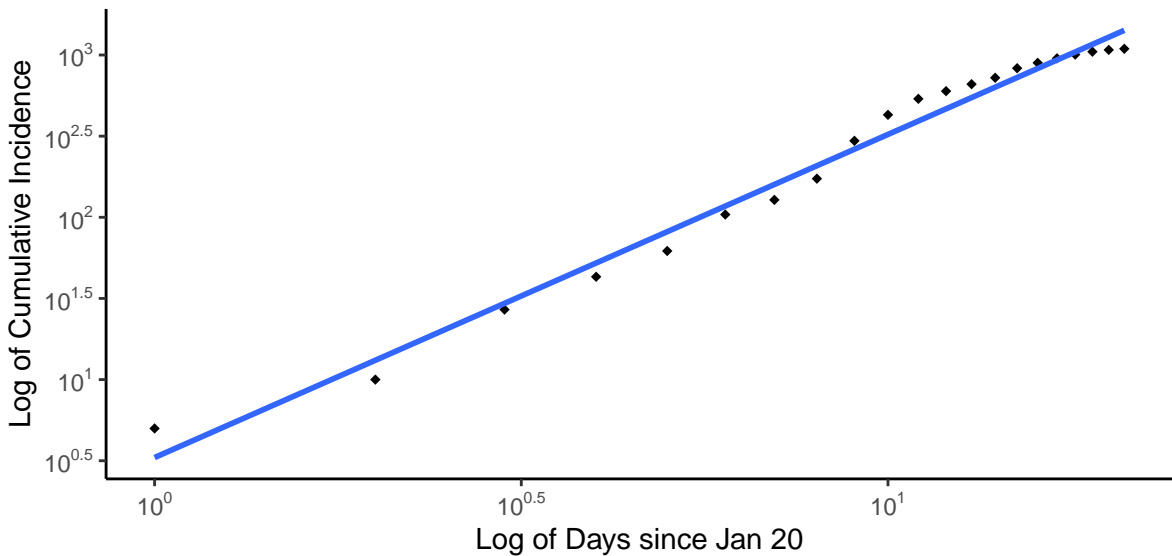

Source: https://medrxiv.org/content/medrxiv/early/2020/02/28/2020.02.05.20020750.full.pdf
